# Supplementary material for: Better Agreement of Human Transcriptomic and Proteomic Cancer Expression Data at the Molecular Pathway Activation Level
Source: Int J Mol Sci. 2022 Feb 26;23(5):2611. doi: 10.3390/ijms23052611 (PMC8910457; doi:10.3390/ijms23052611)
Supplement: Supplementary file 1 [file ijms-23-02611-s001.zip › ijms-1577422-supplementary.pdf]

# Supplementary Materials for

## **Better agreement of human transcriptomic and proteomic cancer expression data at the molecular pathway activation level**

Mikhail Raevskiy<sup>1,2,3</sup>, Maxim Sorokin<sup>2,3</sup>, Galina Zakharova<sup>2</sup>, Victor Tkachev<sup>4</sup>, Nicolas Borisov<sup>5</sup>, Denis Kuzmin<sup>5</sup>, Kristina Kremenchutckaya<sup>5</sup>, Alexander Gudkov<sup>2</sup>, Dmitry Kamashev<sup>2,3</sup>, Anton Buzdin<sup>2,3,5\*</sup>

Correspondence to: [buzdin@oncobox.com](mailto:buzdin@oncobox.com)

**This PDF file includes:**

Figures. S1 to S7

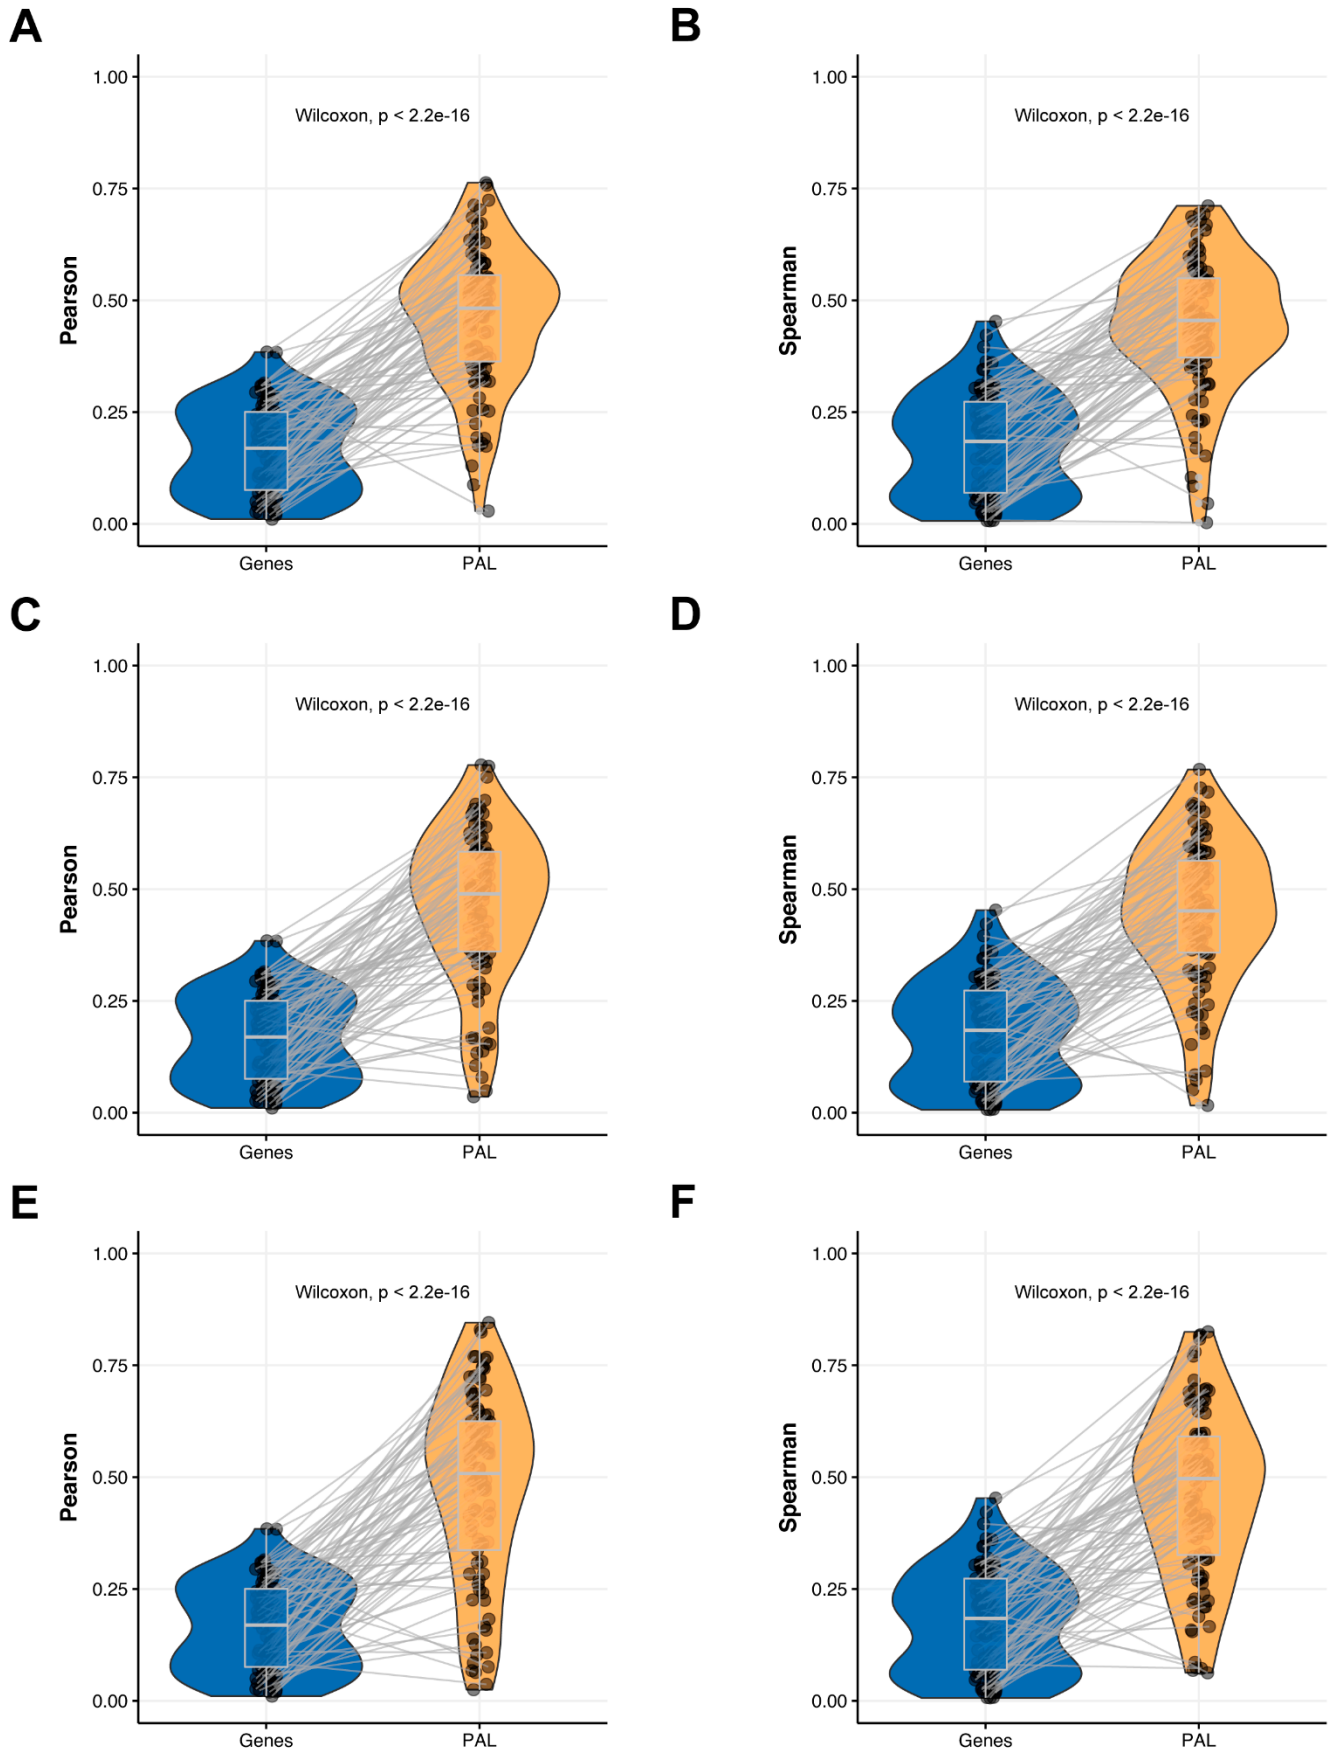

**Figure S1.** Paired gene-to-gene and PAL-to-PAL correlation between RNA and protein expression levels estimated within Breast Invasive Carcinoma biosamples using Pearson and Spearman correlation coefficients for a pool of molecular pathways having (A-B) 10, (C-D) 20, (E-F) 40 and more genes.

**A**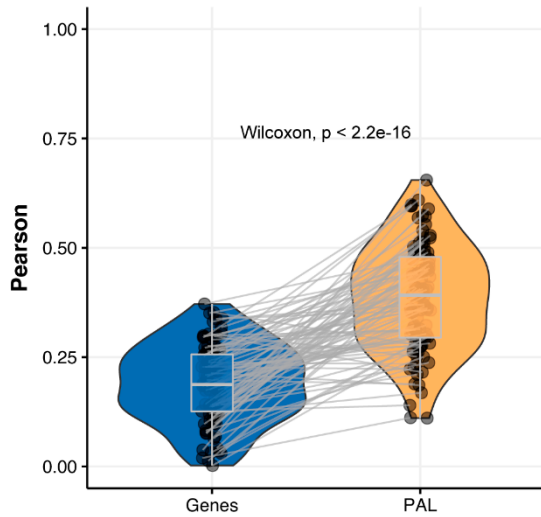**B**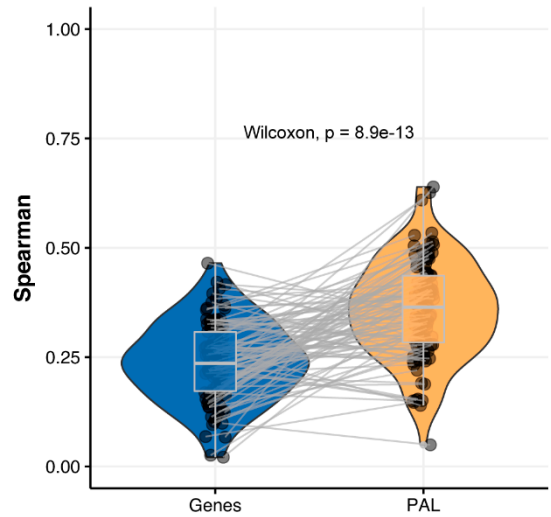**C**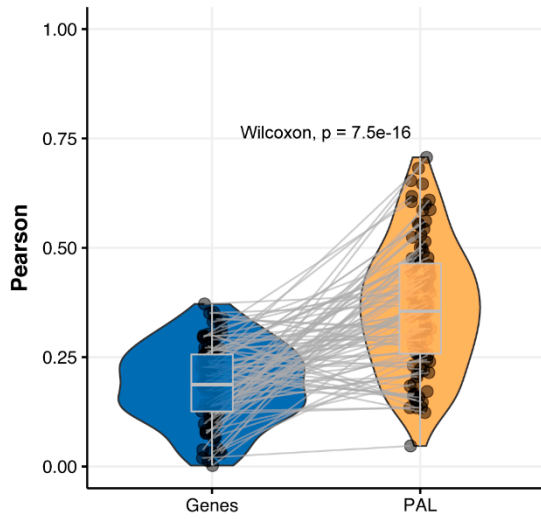**D**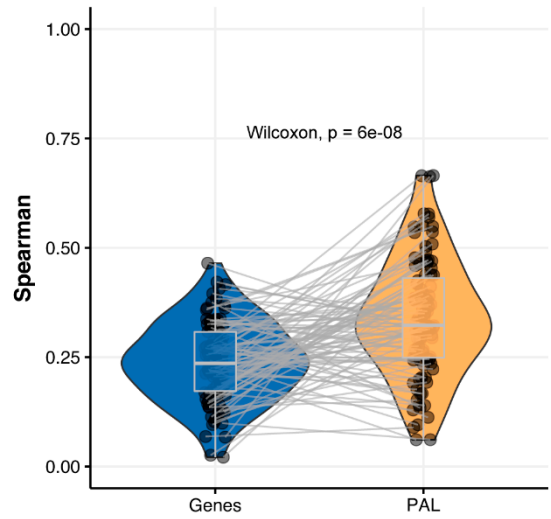**E**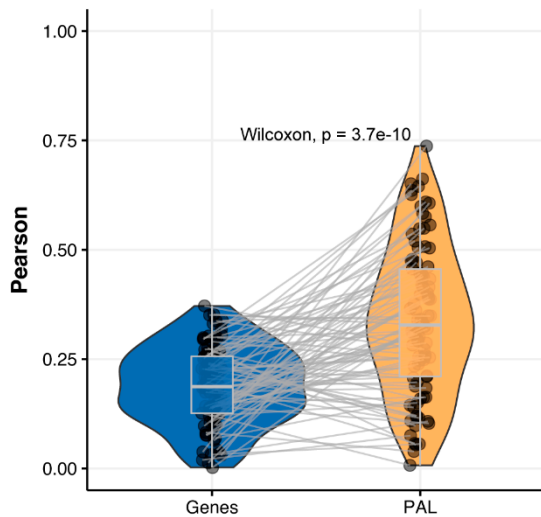**F**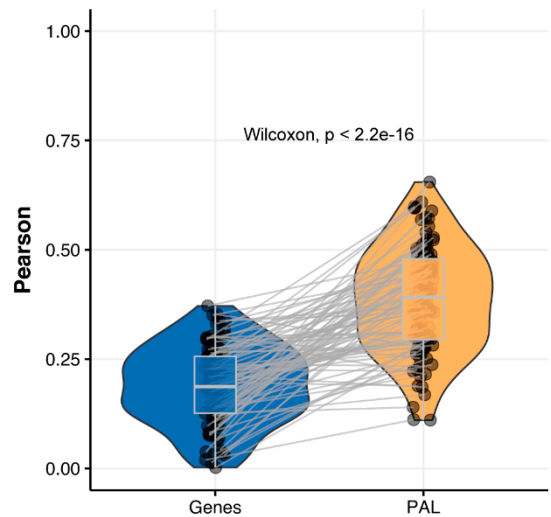

**Figure S2.** Paired gene-to-gene and PAL-to-PAL correlation between RNA and protein expression levels estimated within Glioblastoma Multiforme biosamples using Pearson and Spearman correlation coefficients for a pool of molecular pathways having (A-B) 10, (C-D) 20, (E-F) 40 and more genes.

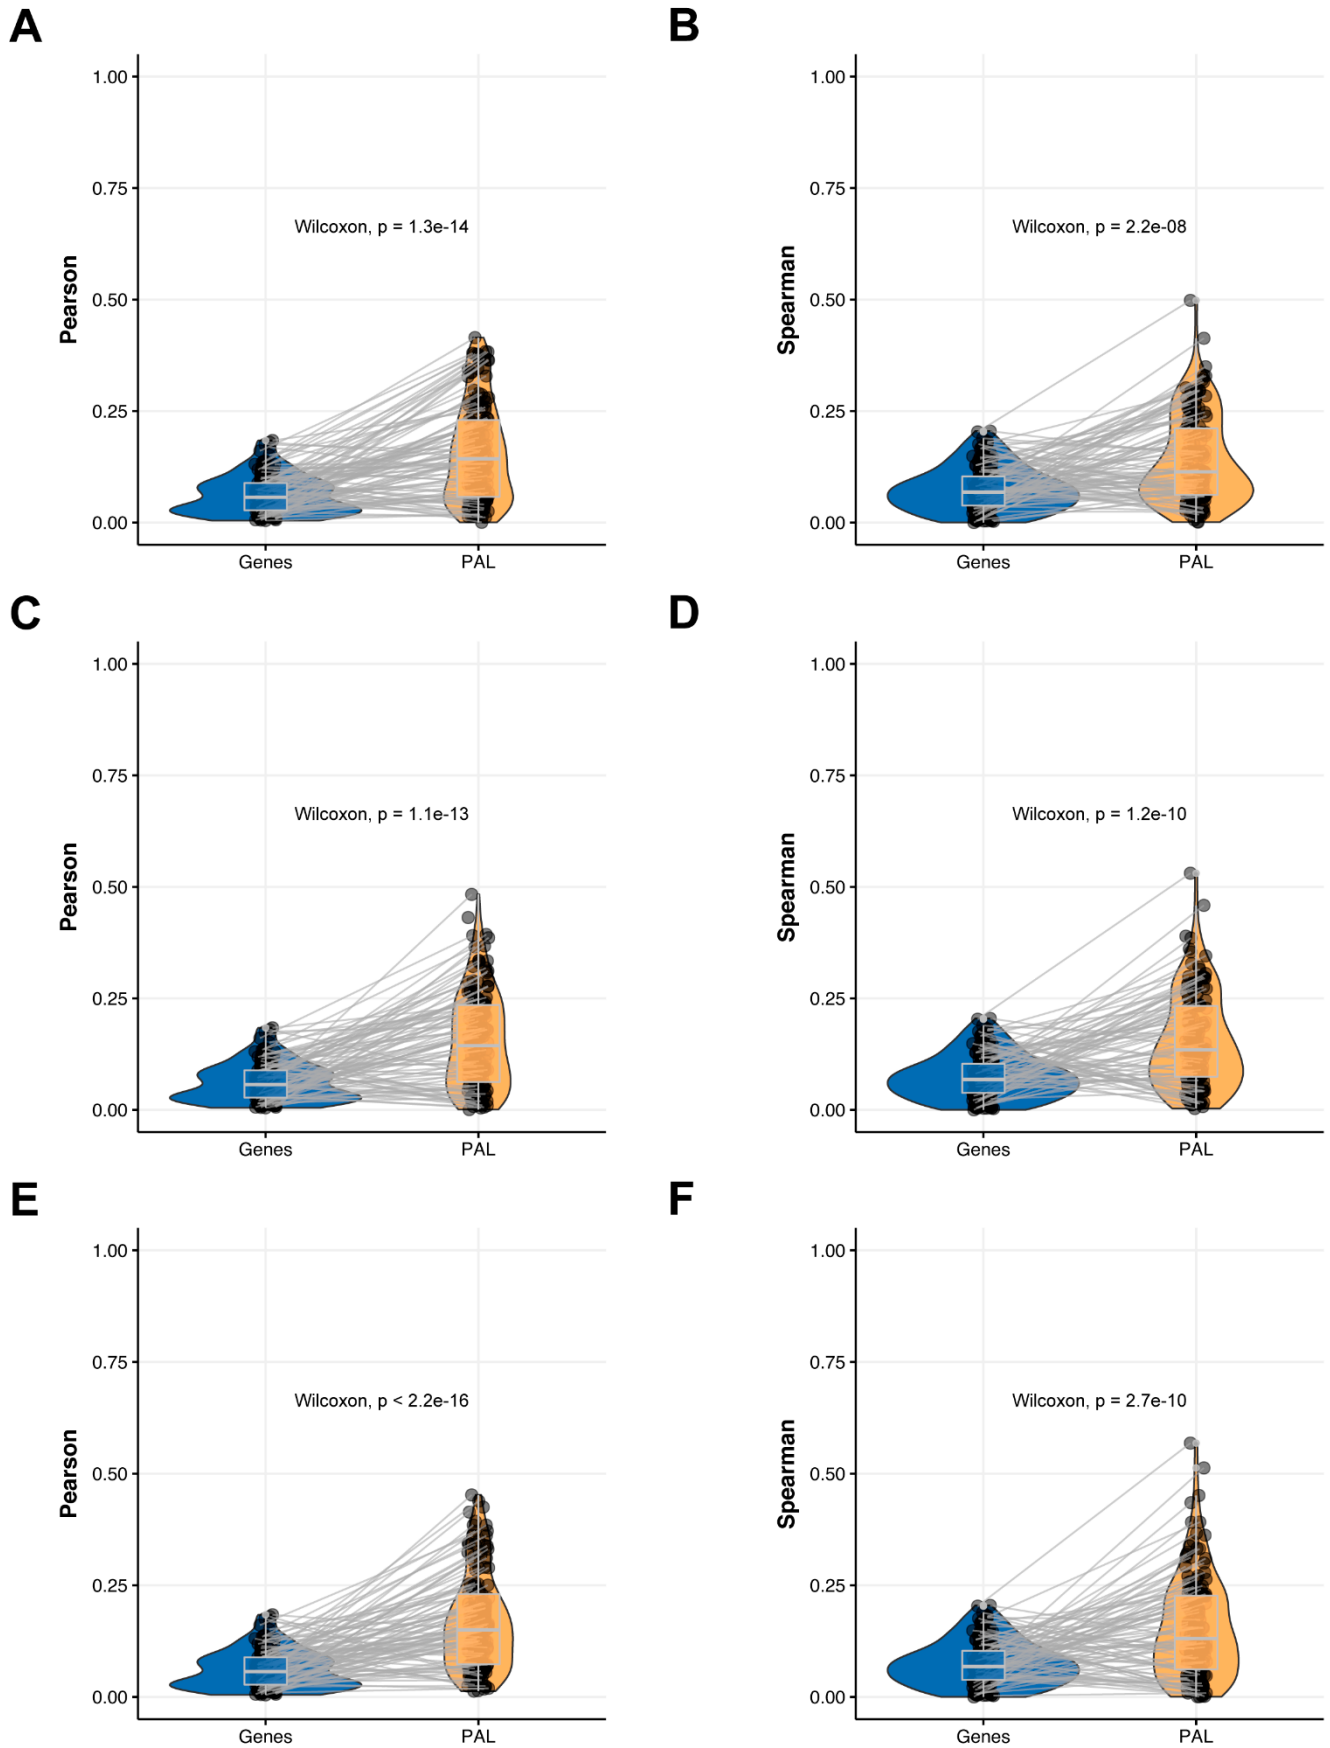

**Figure S3.** Paired gene-to-gene and PAL-to-PAL correlation between RNA and protein expression levels estimated within Hepatocellular Carcinoma biosamples using Pearson and Spearman correlation coefficients for a pool of molecular pathways having (A-B) 10, (C-D) 20, (E-F) 40 and more genes.

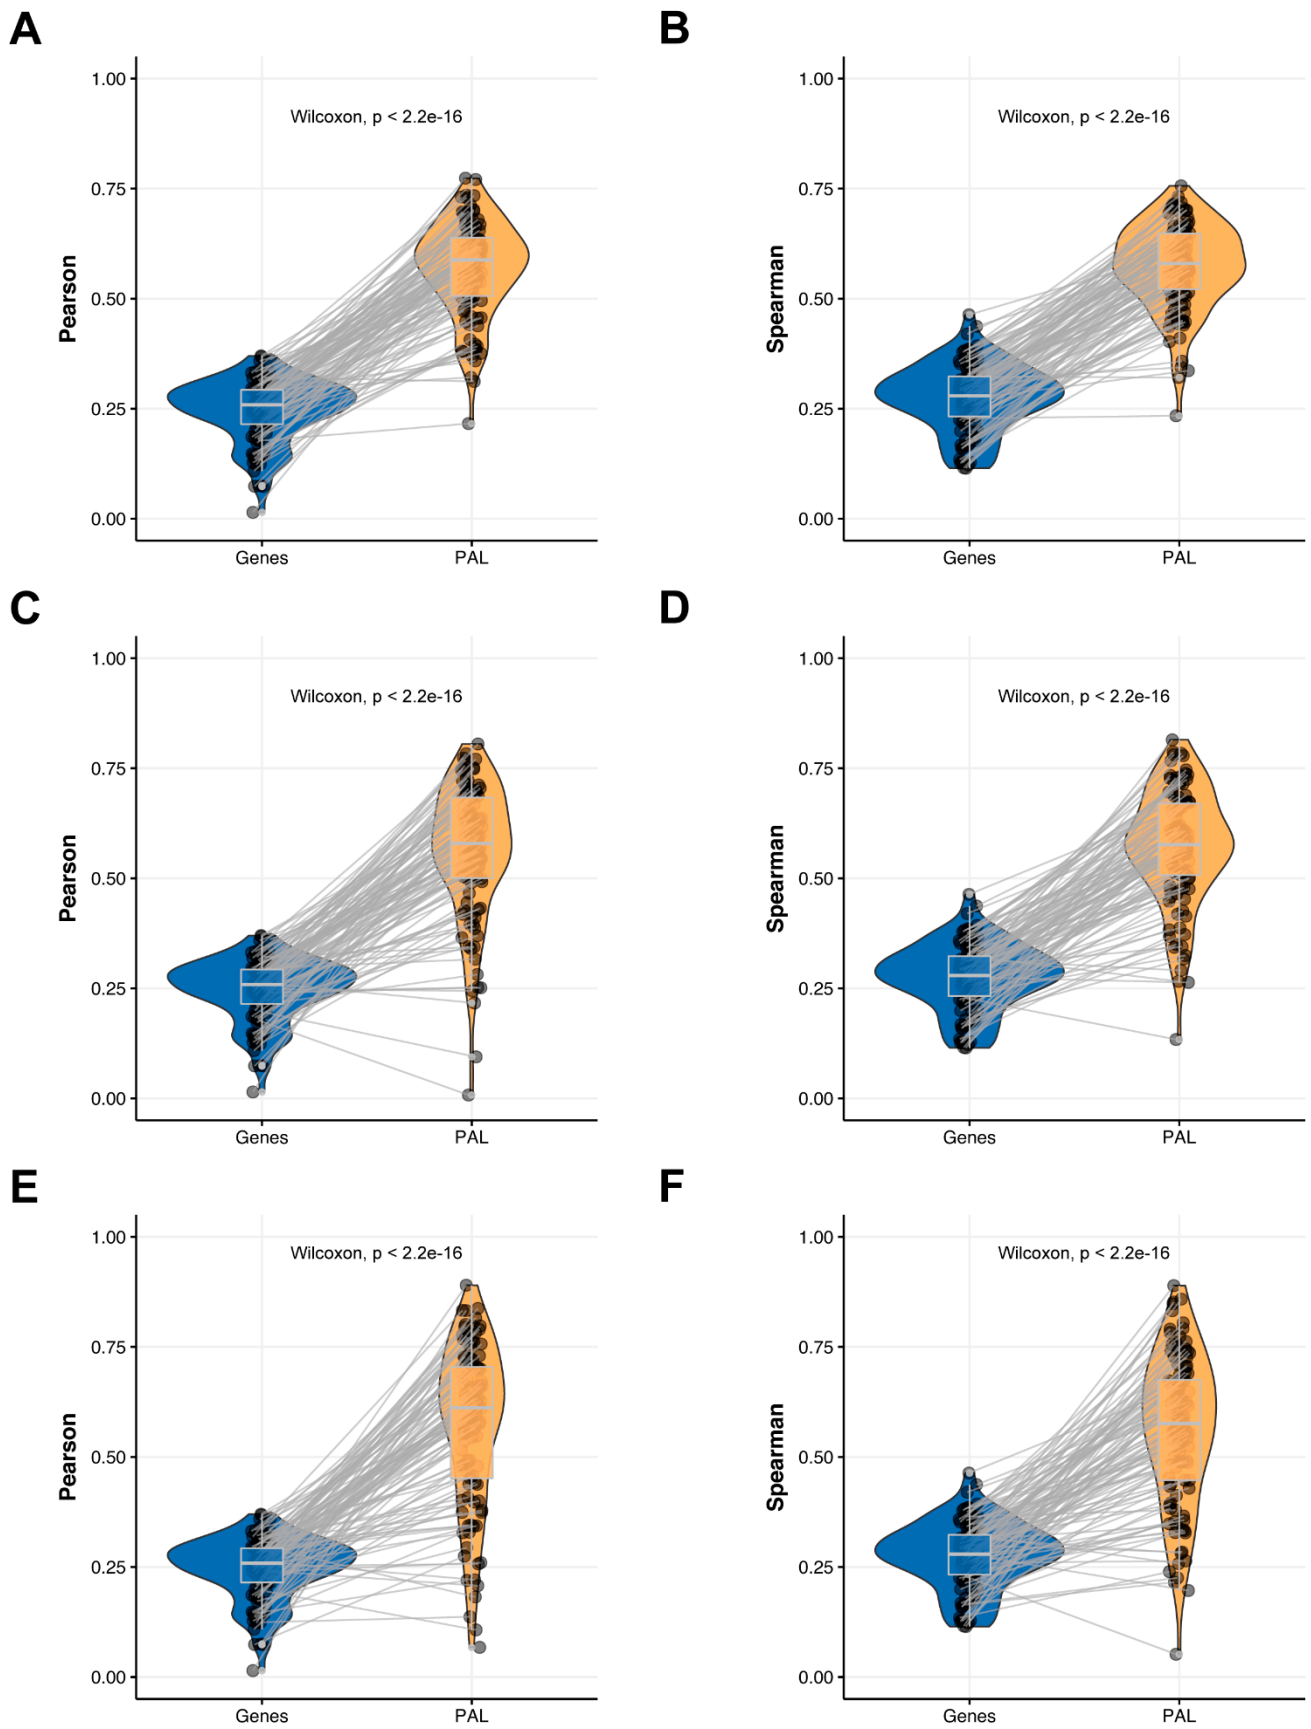

**Figure S4.** Paired gene-to-gene and PAL-to-PAL correlation between RNA and protein expression levels estimated within Lung Adenocarcinoma biosamples using Pearson and Spearman correlation coefficients for a pool of molecular pathways having (A-B) 10, (C-D) 20, (E-F) 40 and more genes.

**A**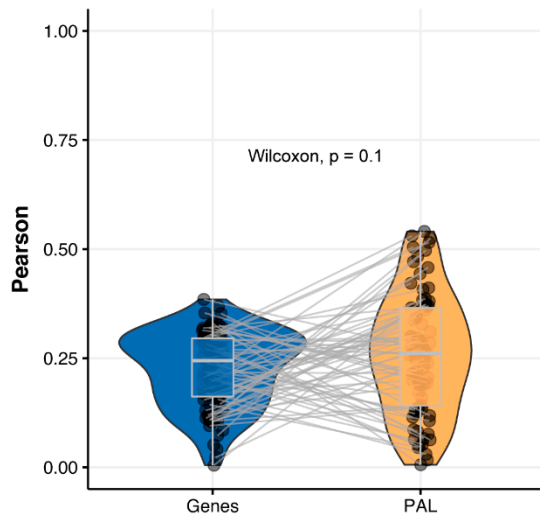**B**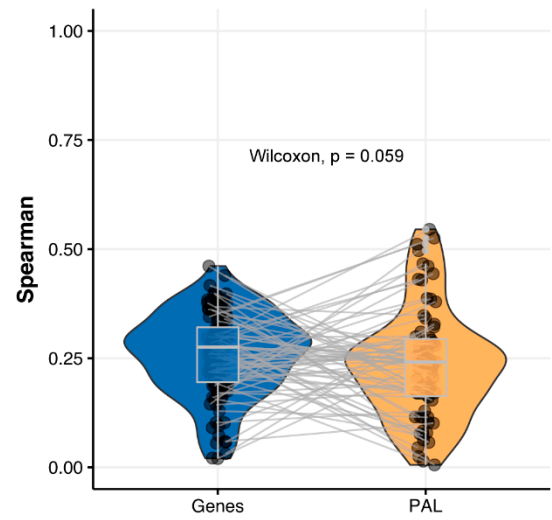**C**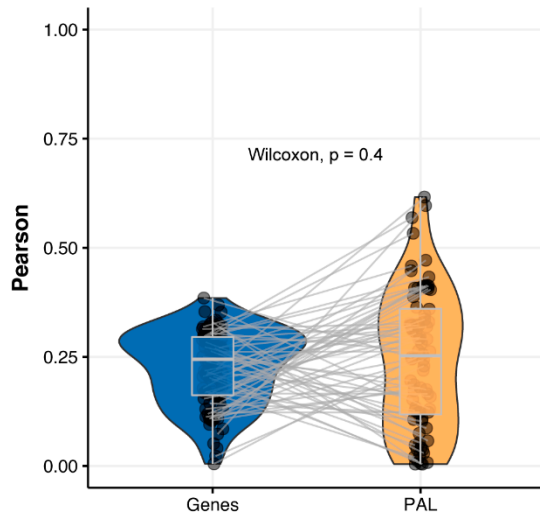**D**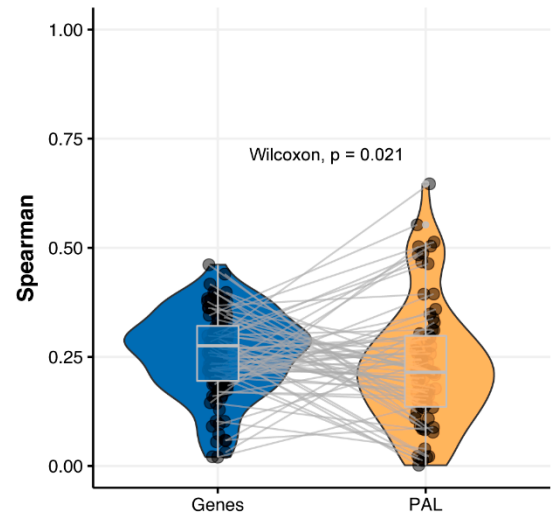**E**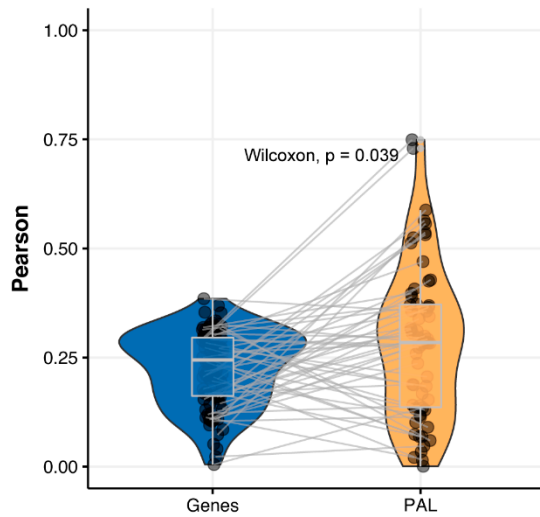**F**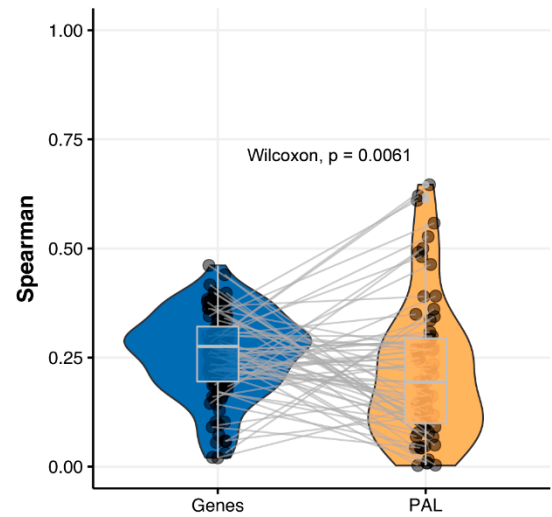

**Figure S5.** Paired gene-to-gene and PAL-to-PAL correlation between RNA and protein expression levels estimated within Ovarian Serous Cystadenocarcinoma biosamples using Pearson and Spearman correlation coefficients for a pool of molecular pathways having (A-B) 10, (C-D) 20, (E-F) 40 and more genes.

**A**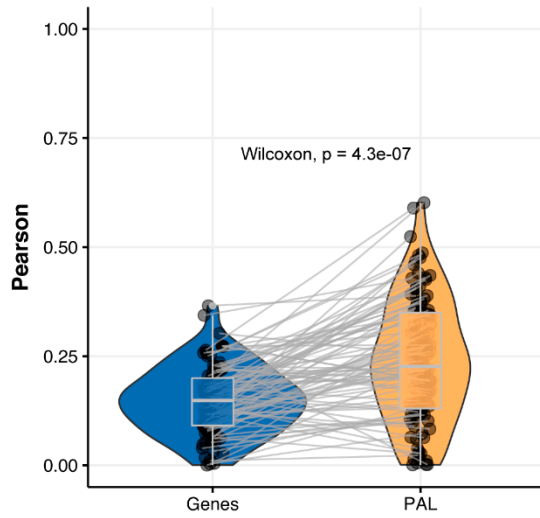**B**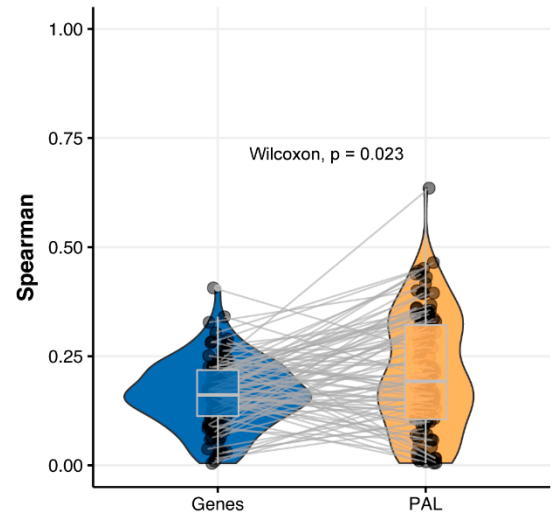**C**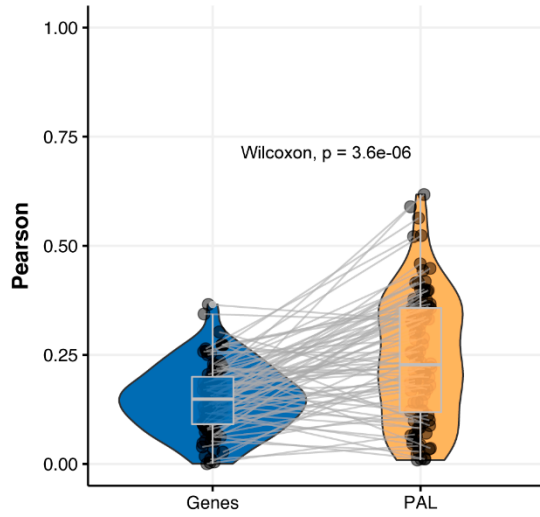**D**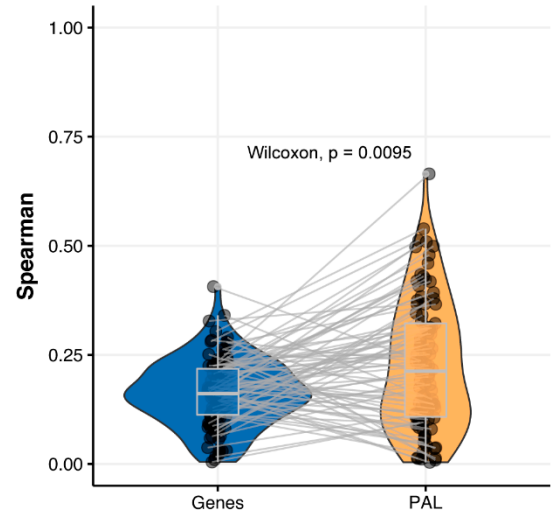**E**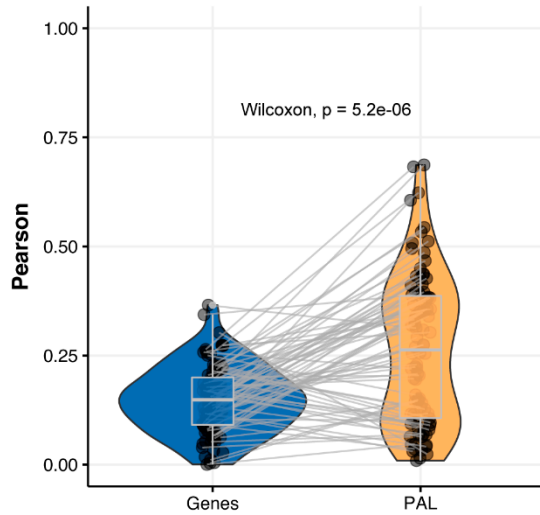**F**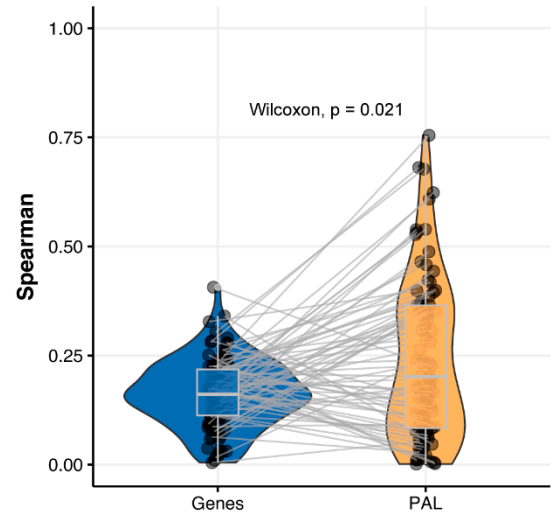

**Figure S6.** Paired gene-to-gene and PAL-to-PAL correlation between RNA and protein expression levels estimated within Pancreatic Ductal Adenocarcinoma biosamples using Pearson and Spearman correlation coefficients for a pool of molecular pathways having (A-B) 10, (C-D) 20, (E-F) 40 and more genes.

**A**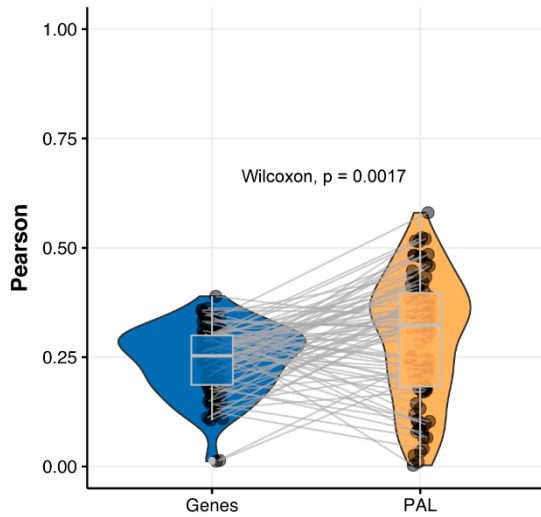**B**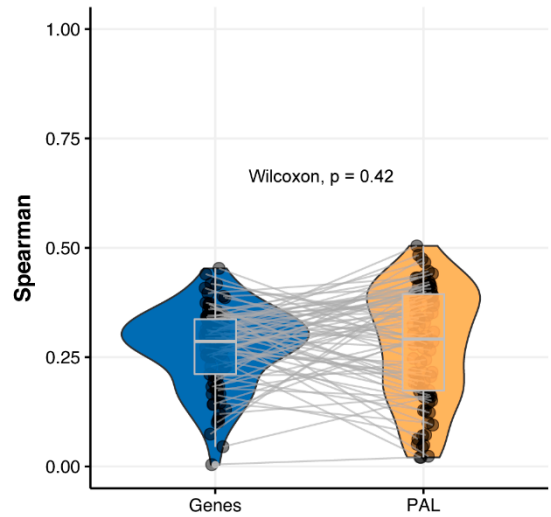**C**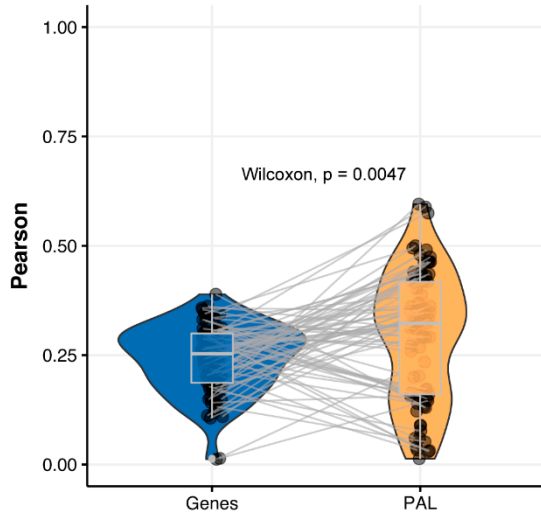**D**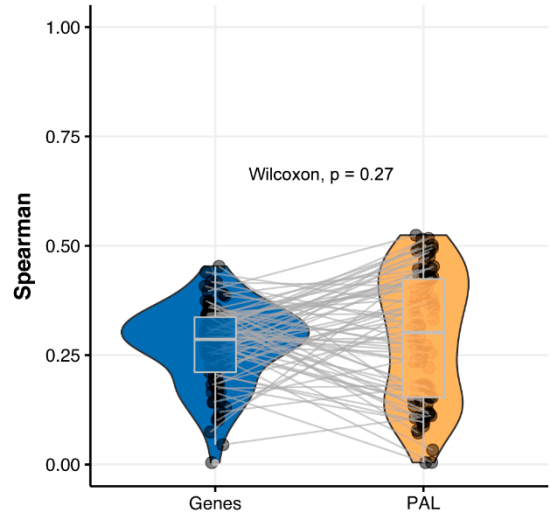**E**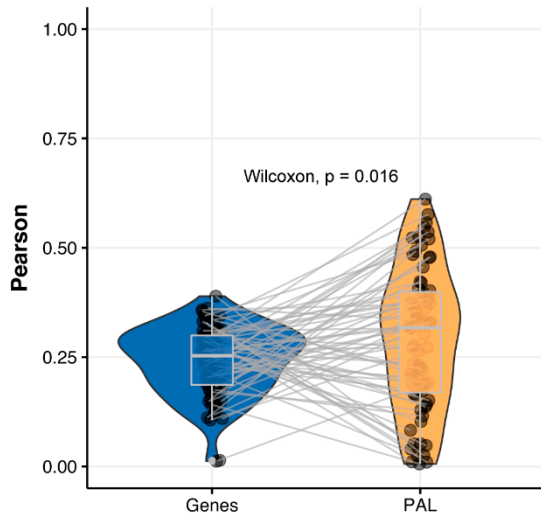**F**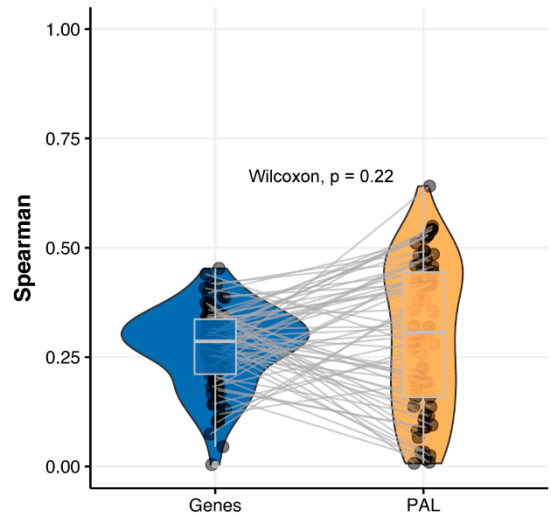

**Figure S7.** Paired gene-to-gene and PAL-to-PAL correlation between RNA and protein expression levels estimated within Uterine Corpus Endometrial Carcinoma biosamples using Pearson and Spearman correlation coefficients for a pool of molecular pathways having (A-B) 10, (C-D) 20, (E-F) 40 and more genes.
