# Supplementary material for: Better Agreement of Human Transcriptomic and Proteomic Cancer Expression Data at the Molecular Pathway Activation Level
Source: Int J Mol Sci. 2022 Feb 26;23(5):2611. doi: 10.3390/ijms23052611 (PMC8910457; doi:10.3390/ijms23052611)
Supplement: Supplementary file 1 [file ijms-23-02611-s001.zip › Supplementary_Table_S1.xlsx]

## Sheet: Breast_Invasive_Carcinoma
Pathway	Pearson	Spearman
Ephrin-mediated_Signaling_Events_During_Cell_Adhesion - Cytoskeleton 1.2	0.729969	0.77008
guanosine_nucleotides_ide_novoi_biosynthesis - Metabolism 1.4	0.743509	0.759196
reactome_Polymerase_switching_Main_Pathway - Reactome 1.3	0.74685	0.736698
reactome_Polymerase_switching_on_the_C_strand_of_the_telomere_Main_Pathway - Reactome 1.3	0.74685	0.736698
NCI_Aurora_B_signaling_Main_Pathway - NCI 1.2	0.712038	0.730946
KEGG_Bacterial_invasion_of_epithelial_cells_Main_Pathway - KEGG Adjusted 1.5	0.711066	0.718615
NAD_ide_novoi_biosynthesis - Metabolism 1.4	0.740302	0.71859
Development_of_Immune_Synapse - Cytoskeleton 1.2	0.701804	0.71415
KEGG_Osteoclast_differentiation_Main_Pathway - KEGG Adjusted 1.5	0.722952	0.712678
Tumour_Infiltration_Pathway - Primary 1.4	0.717255	0.711194
Cytoskeleton_Reorganization - Cytoskeleton 1.2	0.662693	0.707706
D-imyoi-inositol_145-trisphosphate_biosynthesis - Metabolism 1.4	0.672653	0.703389
NCI_ErbB1_downstream_signaling_Main_Pathway - NCI 1.2	0.694764	0.699617
biocarta_inhibition_of_cellular_proliferation_by_gleevec_Main_Pathway - Biocarta 1.2	0.701663	0.6918
biocarta_il_3_signaling_Main_Pathway - Biocarta 1.2	0.629824	0.685071
KEGG_alpha_Linolenic_acid_metabolism_Main_Pathway - KEGG Adjusted 1.5	0.654555	0.684589
reactome_Activation_of_ATR_in_response_to_replication_stress_Main_Pathway - Reactome 1.3	0.678363	0.683401
reactome_Synthesis_of_Leukotrienes_LT_and_Eoxins_EX__Main_Pathway - Reactome 1.3	0.670177	0.679852
IL-10_Pathway - Primary 1.4	0.711209	0.678565
reactome_Activation_of_the_pre_replicative_complex_Main_Pathway - Reactome 1.3	0.662721	0.677638
IL-2_Pathway - Primary 1.4	0.637335	0.676413
reactome_Interleukin_7_signaling_Main_Pathway - Reactome 1.3	0.628491	0.67624
KEGG_Ras_signaling_Main_Pathway - KEGG Adjusted 1.5	0.615167	0.673222
Chemotaxis_Driven_by_IL-8_and_LTB4 - Cytoskeleton 1.2	0.675698	0.672554
L-kynurenine_degradation - Metabolism 1.4	0.664674	0.666914
NCI_Signaling_events_mediated_by_VEGFR1_and_VEGFR2_Pathway_(cell_proliferation) - NCI 1.2	0.752076	0.666209
KEGG_VEGF_signaling_Main_Pathway - KEGG Adjusted 1.5	0.685949	0.664032
adenosine_deoxyribonucleotides_ide_novoi_biosynthesis - Metabolism 1.4	0.656269	0.661534
HMGB1_signaling_through_RAGE - Cytoskeleton 1.2	0.689099	0.658182
reactome_Interleukin_2_signaling_Main_Pathway - Reactome 1.3	0.628443	0.656388
CCR3_Pathway_in_Eosinophils - Cytoskeleton 1.2	0.693981	0.651923
IL-2_Pathway_Gene_Expression_via_FYN_LYN_RPS6KB1_PTK2B - Primary 1.4	0.6266	0.650056
NCI_Ephrin_B_reverse_signaling_Pathway_(angiogenesis) - NCI 1.2	0.628902	0.648237
NCI_Ephrin_B_reverse_signaling_Pathway_(endothelial_cell_migration) - NCI 1.2	0.628902	0.648237
NCI_EPO_signaling_Main_Pathway - NCI 1.2	0.650895	0.647359
D-imyoi-inositol-5-phosphate_metabolism - Metabolism 1.4	0.678294	0.645677
reactome_Signaling_by_SCF_KIT_Main_Pathway - Reactome 1.3	0.659946	0.644465
FN1_Influence_on_Cell_Motility_via_Integrins - Cytoskeleton 1.2	0.678128	0.642066
HGF_Pathway_Gene_Expression_via_JUN_STAT3_FOS_ELK1_ETS2 - Primary 1.4	0.649493	0.641583
KEGG_Taste_transduction_Main_Pathway - KEGG Adjusted 1.5	0.687893	0.640421
adenosine_ribonucleotides_ide_novoi_biosynthesis - Metabolism 1.4	0.614113	0.638219
KEGG_Salivary_secretion_Main_Pathway - KEGG Adjusted 1.5	0.627333	0.637576
KEGG_Melanoma_Main_Pathway - KEGG Adjusted 1.5	0.611777	0.635819
reactome_Activation_of_gene_expression_by_SREBF_SREBP__Main_Pathway - Reactome 1.3	0.623521	0.633086
reactome_Pyrimidine_catabolism_Main_Pathway - Reactome 1.3	0.584021	0.632777
AHR_Pathway_Cath_D_expression_via_SP1 - Primary 1.4	0.667902	0.630204
KEGG_Fc_epsilon_RI_signaling_Main_Pathway - KEGG Adjusted 1.5	0.698784	0.628027
NCI_BCR_signaling_Main_Pathway - NCI 1.2	0.598518	0.627904
NCI_ErbB1_downstream_signaling_Pathway_(ruffle_organization) - NCI 1.2	0.611673	0.62658
KEGG_Progesterone_mediated_oocyte_maturation_Main_Pathway - KEGG Adjusted 1.5	0.651669	0.625863
reactome_Downstream_TCR_signaling_Main_Pathway - Reactome 1.3	0.588842	0.625442
reactome_Inhibition_of_replication_initiation_of_damaged_DNA_by_RB1_E2F1_Main_Pathway - Reactome 1.3	0.642875	0.624886
reactome_EPHB_mediated_forward_signaling_Main_Pathway - Reactome 1.3	0.651493	0.624638
NCI_JNK_signaling_in_the_CD4_TCR_Main_Pathway - NCI 1.2	0.646645	0.624168
NCI_Ephrin_B_reverse_signaling_Pathway_(cell_adhesion) - NCI 1.2	0.63838	0.623476
reactome_Downstream_signal_transduction_Main_Pathway - Reactome 1.3	0.640094	0.622498
Akt_Signaling_Pathway_Cell_Cycle_Progression - Primary 1.4	0.533717	0.620087
biocarta_il_7_signal_transduction_Main_Pathway - Biocarta 1.2	0.62145	0.618009
KEGG_Gap_junction_Main_Pathway - KEGG Adjusted 1.5	0.724294	0.615968
KEGG_TNF_signaling_Main_Pathway - KEGG Adjusted 1.5	0.609026	0.610365
KEGG_Base_excision_repair_Main_Pathway - KEGG Adjusted 1.5	0.613513	0.609017
reactome_Depolymerisation_of_the_Nuclear_Lamina_Main_Pathway - Reactome 1.3	0.629032	0.606073
KEGG_Chronic_myeloid_leukemia_Main_Pathway - KEGG Adjusted 1.5	0.63873	0.602511
NCI_Alpha6_beta4_integrin_ligand_interactions_Main_Pathway - NCI 1.2	0.527451	0.601991
Chemotaxis_Driven_by_CCR4 - Cytoskeleton 1.2	0.61205	0.600383
Chemotaxis_of_Immune_Cells_During_Allergic_Asthma_and_Eczema_Driven_by_CCR4 - Cytoskeleton 1.2	0.61205	0.600383
KEGG_Hepatitis_C_Main_Pathway - KEGG Adjusted 1.5	0.612474	0.60021
NCI_Alpha_synuclein_signaling_Pathway_(Pathway_negative_regulation_of_transcription_via_TOR1A_SNCA_STUB1_FKBP1A) - NCI 1.2	0.664441	0.597427
NCI_Alpha_synuclein_signaling_Pathway_(Pathway_positive_regulation_of_gene_specific_transcription_via_TOR1A_SNCA_FKBP1A_STUB1) - NCI 1.2	0.664441	0.597427
reactome_Processing_of_Intronless_Pre_mRNAs_Main_Pathway - Reactome 1.3	0.54495	0.59666
NCI_Ephrin_B_reverse_signaling_Main_Pathway - NCI 1.2	0.585893	0.596648
biocarta_stathmin_and_breast_cancer_resistance_to_antimicrotubule_agents_Main_Pathway - Biocarta 1.2	0.608294	0.596537
biocarta_map_kinase_inactivation_of_smrt_corepressor_Main_Pathway - Biocarta 1.2	0.626576	0.595189
KEGG_Neurotrophin_signaling_Main_Pathway - KEGG Adjusted 1.5	0.63574	0.594706
biocarta_lck_and_fyn_tyrosine_kinases_in_initiation_of_tcr_activation_Main_Pathway - Biocarta 1.2	0.578713	0.592851
NCI_Signaling_events_mediated_by_focal_adhesion_kinase_Pathway_(negative_regulation_of_cell_adhesion_involved_in_substrate_bound_cell_migration) - NCI 1.2	0.599726	0.592542
biocarta_role_of_mef2d_in_t_cell_apoptosis_Main_Pathway - Biocarta 1.2	0.586048	0.590377
reactome_temp_Nuclear_Receptor_transcription_pathway - Reactome 1.3	0.58128	0.589375
NCI_Signaling_events_mediated_by_focal_adhesion_kinase_Pathway_(cell_migration) - NCI 1.2	0.593125	0.589116
TRAF_Pathway_Apoptosis - Primary 1.4	0.597086	0.588732
NCI_Aurora_A_signaling_Pathway_(centrosome_duplication) - NCI 1.2	0.565242	0.588163
STAT3_Pathway - Primary 1.4	0.609631	0.586209
RANK_Signaling_in_Osteoclasts_Pathway_Inhibition_of_Death - Primary 1.4	0.632813	0.586036
NCI_EPHA_forward_signaling_Pathway_(proteasomal_ubiquitin_dependent_protein_catabolic_process) - NCI 1.2	0.645859	0.584131
reactome_Synthesis_of_Prostaglandins_PG_and_Thromboxanes_TX__Main_Pathway - Reactome 1.3	0.571424	0.58355
NCI_Netrin_mediated_signaling_events_Main_Pathway - NCI 1.2	0.601243	0.578899
NCI_Alpha_synuclein_signaling_Pathway_(neuron_apoptosis) - NCI 1.2	0.63306	0.578701
NCI_Atypical_NF_kappaB_Main_Pathway - NCI 1.2	0.606588	0.576673
reactome_Smooth_Muscle_Contraction_Main_Pathway - Reactome 1.3	0.433624	0.575894
NCI_Signaling_events_regulated_by_Ret_tyrosine_kinase_Pathway_(lamellipodium_assembly) - NCI 1.2	0.595286	0.575869
NCI_Signaling_mediated_by_p38_gamma_and_p38_delta_Main_Pathway - NCI 1.2	0.572709	0.575473
biocarta_hiv_1_nef_negative_effector_of_fas_and_tnf_Pathway_(Pathway_protein_ubiquitination_of_CHUK) - Biocarta 1.2	0.614279	0.574521
KEGG_Insulin_secretion_Main_Pathway - KEGG Adjusted 1.5	0.584257	0.573568
biocarta_skeletal_muscle_hypertrophy_is_regulated_via_akt_mtor_Main_Pathway - Biocarta 1.2	0.545615	0.572752
reactome_Acetylcholine_regulates_insulin_secretion_Main_Pathway - Reactome 1.3	0.555245	0.571763
reactome_Synthesis_of_PIPs_at_the_plasma_membrane_Main_Pathway - Reactome 1.3	0.612932	0.571552
biocarta_regulation_of_bad_phosphorylation_Main_Pathway - Biocarta 1.2	0.571933	0.571391
KEGG_p53_signaling_Main_Pathway - KEGG Adjusted 1.5	0.589006	0.569981
NCI_Nongenotropic_Androgen_signaling_Pathway_(apoptosis) - NCI 1.2	0.603962	0.569709
reactome_p75NTR_recruits_signalling_complexes_Main_Pathway - Reactome 1.3	0.489629	0.568225
KEGG_RNA_transport_Main_Pathway - KEGG Adjusted 1.5	0.526673	0.564848
KEGG_Acute_myeloid_leukemia_Main_Pathway - KEGG Adjusted 1.5	0.595448	0.56475
NCI_Signaling_events_mediated_by_focal_adhesion_kinase_Main_Pathway - NCI 1.2	0.619876	0.563896
CMP_phosphorylation - Metabolism 1.4	0.625023	0.563624
HGF_Pathway_Cell_Cycle_Progression - Primary 1.4	0.542024	0.563513
reactome_Prolactin_receptor_signaling_Main_Pathway - Reactome 1.3	0.563754	0.561336
KEGG_Leukocyte_transendothelial_migration_Main_Pathway - KEGG Adjusted 1.5	0.565356	0.560557
biocarta_role_of_pi3k_subunit_p85_in_regulation_of_actin_organization_and_cell_migration_Main_Pathway - Biocarta 1.2	0.542689	0.559988
NCI_EPHA_forward_signaling_Main_Pathway - NCI 1.2	0.650722	0.559419
reactome_Synthesis_of_bile_acids_and_bile_salts_via_27_hydroxycholesterol_Main_Pathway - Reactome 1.3	0.562617	0.559406
IL-10_Pathway_Translational_Modulation - Primary 1.4	0.608017	0.558936
KEGG_Glycerophospholipid_metabolism_Main_Pathway - KEGG Adjusted 1.5	0.613709	0.558404
Gamma-Aminobutyric_Acid_A_Receptor_Pathway - Cytoskeleton 1.2	0.583675	0.558132
NCI_Endothelins_Main_Pathway - NCI 1.2	0.582742	0.556821
TGF-Beta_Pathway_Post_Transciptional_G1_Arrest - Primary 1.4	0.527981	0.556562
HIF1Alpha_Pathway_NOS_Pathway - Primary 1.4	0.505765	0.556302
HIF1Alpha_Pathway_VEGF_Pathway - Primary 1.4	0.505765	0.556302
reactome_APC_C_Cdc20_mediated_degradation_of_Cyclin_B_Main_Pathway - Reactome 1.3	0.53075	0.556079
VEGF_Pathway - Primary 1.4	0.600292	0.555943
AHR_Pathway_PS2_Gene_expression_via_ESR1 - Primary 1.4	0.591597	0.555918
FCGR3A-mediated_phagocytosis - Cytoskeleton 1.2	0.591273	0.555906
biocarta_t_cell_receptor_signaling_Main_Pathway - Biocarta 1.2	0.594352	0.555572
biocarta_melanocyte_development_and_pigmentation_Main_Pathway - Biocarta 1.2	0.568173	0.553692
CDK5_Pathway_in_Central_Nervous_System - Cytoskeleton 1.2	0.541093	0.551837
reactome_Acetylcholine_Neurotransmitter_Release_Cycle_Main_Pathway - Reactome 1.3	0.6073	0.550686
reactome_Dopamine_Neurotransmitter_Release_Cycle_Main_Pathway - Reactome 1.3	0.6073	0.550686
Akt_Signaling_Pathway_JNK_mediated_apoptosis - Primary 1.4	0.519334	0.549079
AHR_Pathway_C-myc_expression_via_RELA - Primary 1.4	0.607892	0.548361
KEGG_Morphine_addiction_Main_Pathway - KEGG Adjusted 1.5	0.521118	0.548312
gamma-linolenate_biosynthesis - Metabolism 1.4	0.571657	0.547953
NCI_Nephrin_Neph1_signaling_in_the_kidney_podocyte_Main_Pathway - NCI 1.2	0.540447	0.546691
IL-10_Pathway_IL-10_Responsive_Genes_Transcription_of_BCLXL_Cyclin-D1_D2_D3_Pim1_c-Myc_and_P19(INK4D)_via_STAT3 - Primary 1.4	0.569761	0.546209
IL-10_Pathway_Inflammatory_Cytokine_Genes_Expression_via_STAT3 - Primary 1.4	0.569761	0.546209
reactome_APC_Cdc20_mediated_degradation_of_Nek2A_Main_Pathway - Reactome 1.3	0.507721	0.545788
IGF1R_Signaling_Pathway - Primary 1.4	0.551487	0.545244
Akt_Signaling_Pathway_NFAT_degradation - Primary 1.4	0.537623	0.544898
Ras_Pathway - Primary 1.4	0.562258	0.543352
reactome_APC_C_Cdc20_mediated_degradation_of_mitotic_proteins_Main_Pathway - Reactome 1.3	0.519187	0.541039
reactome_Inactivation_of_APC_C_via_direct_inhibition_of_the_APC_C_complex_Main_Pathway - Reactome 1.3	0.519187	0.541039
NCI_Neurotrophic_factor_mediated_Trk_receptor_signaling_Pathway_(Schwann_cell_development) - NCI 1.2	0.538571	0.54047
reactome_Signaling_by_FGFR1_fusion_mutants_Main_Pathway - Reactome 1.3	0.58897	0.540334
glutathione-mediated_detoxification - Metabolism 1.4	0.559664	0.540309
biocarta_nfkb_activation_by_nontypeable_hemophilus_influenzae_Main_Pathway - Biocarta 1.2	0.57029	0.540037
NCI_Internalization_of_ErbB1_Main_Pathway - NCI 1.2	0.525616	0.538949
NCI_Signaling_mediated_by_p38_alpha_and_p38_beta_Main_Pathway - NCI 1.2	0.507511	0.537848
CXC_Chemokine_Receptor_Pathway - Cytoskeleton 1.2	0.527779	0.536772
NCI_Signaling_events_mediated_by_PTP1B_Main_Pathway - NCI 1.2	0.572339	0.536463
reactome_Interaction_With_The_Zona_Pellucida_Main_Pathway - Reactome 1.3	0.448196	0.536233
Akt_Signaling_Pathway_Induction_of_Chromatin_Condensation - Primary 1.4	0.46507	0.535683
NCI_Signaling_events_mediated_by_Stem_cell_factor_receptor_c_Kit__Main_Pathway - NCI 1.2	0.594639	0.534001
TRAF_Pathway - Primary 1.4	0.576069	0.533086
biocarta_how_does_salmonella_hijack_a_cell_Pathway_(lamellipodium_assembly) - Biocarta 1.2	0.508552	0.532752
UTP_and_CTP_ide_novoi_biosynthesis - Metabolism 1.4	0.591704	0.531268
biocarta_keratinocyte_differentiation_Main_Pathway - Biocarta 1.2	0.560095	0.531107
biocarta_rho_selective_guanine_exchange_factor_akap13_mediates_stress_fiber_formation_Main_Pathway - Biocarta 1.2	0.565605	0.531107
STAT3_Pathway_Growth_Arrest_and_Differentiation - Primary 1.4	0.495499	0.53107
reactome_Interleukin_receptor_SHC_signaling_Main_Pathway - Reactome 1.3	0.701669	0.530971
reactome_Signaling_by_Hippo_Main_Pathway - Reactome 1.3	0.529896	0.529845
CDK5_Signaling_in_Neurons - Cytoskeleton 1.2	0.565894	0.529573
reactome_Dual_incision_reaction_in_GG_NER_Main_Pathway - Reactome 1.3	0.590029	0.528868
reactome_Synthesis_of_very_long_chain_fatty_acyl_CoAs_Main_Pathway - Reactome 1.3	0.578803	0.528683
reactome_Interferon_gamma_signaling_Main_Pathway - Reactome 1.3	0.474255	0.526617
reactome_ISG15_antiviral_mechanism_Main_Pathway - Reactome 1.3	0.561607	0.525046
reactome_ERKs_are_inactivated_Main_Pathway - Reactome 1.3	0.543724	0.524329
Ephrin-B_Pathway - Cytoskeleton 1.2	0.526265	0.522202
KEGG_Pertussis_Main_Pathway - KEGG Adjusted 1.5	0.556865	0.521818
D-imyoi-inositol_134-trisphosphate_biosynthesis - Metabolism 1.4	0.517356	0.520829
NCI_Beta5_beta6_beta7_and_beta8_integrin_cell_surface_interactions_Main_Pathway - NCI 1.2	0.482264	0.519975
TRAF_Pathway_Gene_Expression_via_FOS_JUN - Primary 1.4	0.501672	0.519926
biocarta_repression_of_pain_sensation_by_the_transcriptional_regulator_dream_Main_Pathway - Biocarta 1.2	0.542829	0.519542
biocarta_integrin_signaling_Main_Pathway - Biocarta 1.2	0.530787	0.519344
KEGG_Type_I_diabetes_mellitus_Main_Pathway - KEGG Adjusted 1.5	0.525768	0.518454
reactome_Keratan_sulfate_biosynthesis_Main_Pathway - Reactome 1.3	0.536145	0.51833
Akt_Pathway_Regulation_by_GH - Cytoskeleton 1.2	0.544612	0.518219
reactome_Dermatan_sulfate_biosynthesis_Main_Pathway - Reactome 1.3	0.421876	0.517427
Akt_Signaling_Pathway_AR_mediated_apoptosis - Primary 1.4	0.412958	0.517267
KEGG_Aldosterone_regulated_sodium_reabsorption_Main_Pathway - KEGG Adjusted 1.5	0.535166	0.51697
ICOS_signaling_in_T-helper_cells - Cytoskeleton 1.2	0.51197	0.516945
FGFR_Signaling - Cytoskeleton 1.2	0.507075	0.516871
reactome_Activation_of_Rac_Main_Pathway - Reactome 1.3	0.545537	0.516772
reactome_snRNP_Assembly_Main_Pathway - Reactome 1.3	0.499553	0.5141
Chemokine_Ligand_2_Signaling - Cytoskeleton 1.2	0.507975	0.513741
biocarta_mcalpain_and_friends_in_cell_motility_Main_Pathway - Biocarta 1.2	0.568717	0.513506
reactome_Degradation_of_the_extracellular_matrix_Main_Pathway - Reactome 1.3	0.499171	0.511354
NCI_BARD1_signaling_events_Pathway_(DNA_repair) - NCI 1.2	0.461372	0.510872
Akt_Signaling_Pathway_Blood_cell_differentiation - Primary 1.4	0.456276	0.510241
Akt_Signaling_Pathway_Elevation_of_Glucose_Import - Primary 1.4	0.456276	0.510241
Akt_Signaling_Pathway_Genetic_Stability - Primary 1.4	0.456276	0.510241
Akt_Signaling_Pathway_NF-kB_dependent_transciption - Primary 1.4	0.456276	0.510241
SMAD_Signaling_Network_Pathway - Primary 1.4	0.48156	0.509289
KEGG_Bladder_cancer_Main_Pathway - KEGG Adjusted 1.5	0.476862	0.508386
Akt_Signaling_Pathway_Blocks_Apoptosis - Primary 1.4	0.448724	0.50825
reactome_DSCAM_interactions_Main_Pathway - Reactome 1.3	0.482496	0.506246
reactome_Activated_point_mutants_of_FGFR2_Main_Pathway - Reactome 1.3	0.515736	0.505677
1D-imyoi-inositol_hexakisphosphate_biosynthesis_II_mammalian - Metabolism 1.4	0.5536	0.505566
NCI_Integrins_in_angiogenesis_Main_Pathway - NCI 1.2	0.474934	0.50543
KEGG_Arachidonic_acid_metabolism_Main_Pathway - KEGG Adjusted 1.5	0.511401	0.505318
NCI_LKB1_signaling_events_Main_Pathway - NCI 1.2	0.47999	0.503488
NCI_Signaling_events_mediated_by_HDAC_Class_I_Pathway_(histone_deacetylation) - NCI 1.2	0.544821	0.503488
KEGG_Adipocytokine_signaling_Main_Pathway - KEGG Adjusted 1.5	0.553865	0.503476
reactome_Signaling_by_ERBB2_Main_Pathway - Reactome 1.3	0.572841	0.503438
NCI_ATM_Main_Pathway - NCI 1.2	0.464358	0.502783
Akt_Signaling_Pathway_Increased_GLUT4_translocation - Primary 1.4	0.415026	0.502721
Akt_Signaling_Pathway_Aggregation_and_Neurodegeneration - Primary 1.4	0.468267	0.501843
Akt_Signaling_Pathway_Glycogen_Synthesis_and_Apoptosis - Primary 1.4	0.424688	0.501163
reactome_E2F_enabled_inhibition_of_pre_replication_complex_formation_Main_Pathway - Reactome 1.3	0.503715	0.501076
reactome_IRAK1_recruits_IKK_complex_Main_Pathway - Reactome 1.3	0.534306	0.499876
reactome_IRAK1_recruits_IKK_complex_upon_TLR7_8_or_9_stimulation_Main_Pathway - Reactome 1.3	0.534306	0.499876
HIF1Alpha_Pathway_Gene_Expression_via_JUN_CREB3 - Primary 1.4	0.452062	0.499493
Extracellular_Matrix_Remodeling_during_Adhesion - Cytoskeleton 1.2	0.44316	0.498936
Akt_Signaling_Pathway_Cell_Survival - Primary 1.4	0.447092	0.498207
NCI_ErbB1_downstream_signaling_Pathway_(cell_proliferation) - NCI 1.2	0.534232	0.496463
KEGG_Endocytosis_Main_Pathway - KEGG Adjusted 1.5	0.496457	0.49431
reactome_Activation_of_PPARGC1A_PGC_1alpha_by_phosphorylation_Main_Pathway - Reactome 1.3	0.488833	0.492876
IGF1R_Signaling_Pathway_Cell_Proliferation_Diferentiation_and_Apoptosis - Primary 1.4	0.491889	0.492195
Akt_Signaling_Pathway - Primary 1.4	0.468273	0.492171
IL-2_Pathway_Apoptosis_Inhibition - Primary 1.4	0.530326	0.490538
reactome_ERK_MAPK_targets_Main_Pathway - Reactome 1.3	0.551205	0.490068
reactome_temp_Immunoregulatory_interactions_between_a_Lymphoid_and_a_non-Lymphoid_cell - Reactome 1.3	0.555889	0.488176
KEGG_Thyroid_hormone_signaling_Main_Pathway - KEGG Adjusted 1.5	0.512352	0.488089
biocarta_keratinocyte_differentiation_Pathway_(keratinocyte_differentiation) - Biocarta 1.2	0.556779	0.487421
IGF1R_Signaling_Pathway_Apoptosis - Primary 1.4	0.521084	0.487001
KEGG_Arginine_and_proline_metabolism_Main_Pathway - KEGG Adjusted 1.5	0.516069	0.486716
Akt_Signaling_Pathway_Apoptosis - Primary 1.4	0.44439	0.486592
ATM_Pathway_Cell_Survival - Primary 1.4	0.523777	0.486407
reactome_Post_chaperonin_tubulin_folding_Main_Pathway - Reactome 1.3	0.489065	0.485801
biocarta_the_co_stimulatory_signal_during_t_cell_activation_Pathway_(T_cell_activation) - Biocarta 1.2	0.488076	0.485529
Chemotaxis_Driven_by_CCL2 - Cytoskeleton 1.2	0.539524	0.48475
reactome_EPH_ephrin_mediated_repulsion_of_cells_Main_Pathway - Reactome 1.3	0.453503	0.483884
reactome_KSRP_destabilizes_mRNA_Main_Pathway - Reactome 1.3	0.452361	0.483525
reactome_A_tetrasaccharide_linker_sequence_is_required_for_GAG_synthesis_Main_Pathway - Reactome 1.3	0.440387	0.483191
NCI_Notch_signaling_Pathway_(Bergmann_glial_cell_differentiation) - NCI 1.2	0.48003	0.48303
NCI_Signaling_events_mediated_by_Hepatocyte_Growth_Factor_Receptor_c_Met__Main_Pathway - NCI 1.2	0.498374	0.482993
reactome_RNA_Polymerase_III_Transcription_Termination_Main_Pathway - Reactome 1.3	0.452466	0.482845
reactome_EPHA_mediated_growth_cone_collapse_Main_Pathway - Reactome 1.3	0.50457	0.482239
reactome_EGFR_downregulation_Main_Pathway - Reactome 1.3	0.520824	0.482189
reactome_IRAK2_mediated_activation_of_TAK1_complex_Main_Pathway - Reactome 1.3	0.470604	0.482041
reactome_IRAK2_mediated_activation_of_TAK1_complex_upon_TLR7_8_or_9_stimulation_Main_Pathway - Reactome 1.3	0.470604	0.482041
NCI_Signaling_events_mediated_by_HDAC_Class_I_Main_Pathway - NCI 1.2	0.459375	0.481793
KEGG_Glyoxylate_and_dicarboxylate_metabolism_Main_Pathway - KEGG Adjusted 1.5	0.501683	0.481373
cholesterol_biosynthesis_I - Metabolism 1.4	0.433773	0.480334
cholesterol_biosynthesis_II_via_2425-dihydrolanosterol - Metabolism 1.4	0.433773	0.480334
cholesterol_biosynthesis_III_via_desmosterol - Metabolism 1.4	0.433773	0.480334
Ras_Pathway_Gene_Expression_Cell_Proliferation_Cell_Survival_Differentiation_Development_Cell_Cycle_Control_Cell_Motility_Tumorigenesis_via_ELK4_ATF2_MEF2D_STAT2_CREB3_CCNA1_MYC_ELK1_JUN_CDK4 - Primary 1.4	0.468353	0.480284
KEGG_Synthesis_and_degradation_of_ketone_bodies_Main_Pathway - KEGG Adjusted 1.5	0.52656	0.480223
ATM_Pathway_G2-Mitosis_progression - Primary 1.4	0.534327	0.47932
ATM_Pathway_G2_M_Checkpoint_Arrest - Primary 1.4	0.534327	0.47932
KEGG_Pantothenate_and_CoA_biosynthesis_Main_Pathway - KEGG Adjusted 1.5	0.541263	0.479097
TRAF_Pathway_Cell_Survival - Primary 1.4	0.479164	0.479085
KEGG_Collecting_duct_acid_secretion_Main_Pathway - KEGG Adjusted 1.5	0.607106	0.47765
KEGG_Glycosphingolipid_biosynthesis_ganglio_series_Main_Pathway - KEGG Adjusted 1.5	0.49766	0.476747
reactome_Synthesis_of_bile_acids_and_bile_salts_via_7alpha_hydroxycholesterol_Main_Pathway - Reactome 1.3	0.517386	0.475622
HGF_Pathway_Anoikis - Primary 1.4	0.484225	0.474533
biocarta_keratinocyte_differentiation_Pathway_(apoptosis) - Biocarta 1.2	0.572396	0.474409
biocarta_il_4_signaling_Main_Pathway - Biocarta 1.2	0.514043	0.473989
reactome_RNA_Polymerase_III_Abortive_And_Retractive_Initiation_Main_Pathway - Reactome 1.3	0.431194	0.473853
KEGG_Linoleic_acid_metabolism_Main_Pathway - KEGG Adjusted 1.5	0.730798	0.473727
NCI_BARD1_signaling_events_Main_Pathway - NCI 1.2	0.529521	0.47201
NCI_Notch_signaling_Pathway_(oligodendrocyte_development) - NCI 1.2	0.452248	0.471651
reactome_Platelet_sensitization_by_LDL_Main_Pathway - Reactome 1.3	0.500875	0.470785
biocarta_mechanism_of_protein_import_into_the_nucleus_Main_Pathway - Biocarta 1.2	0.447954	0.4694
KEGG_Endometrial_cancer_Main_Pathway - KEGG Adjusted 1.5	0.519168	0.469351
KEGG_Regulation_of_lipolysis_in_adipocytes_Main_Pathway - KEGG Adjusted 1.5	0.473346	0.469239
Akt_Signaling_Pathway_Enhancement_of_Breast_Epithelial - Primary 1.4	0.417736	0.469153
TNF_Signaling_Pathway - Primary 1.4	0.448778	0.469054
NCI_EPHA2_forward_signaling_Main_Pathway - NCI 1.2	0.466703	0.468522
KEGG_Retinol_metabolism_Main_Pathway - KEGG Adjusted 1.5	0.462837	0.467644
reactome_DCC_mediated_attractive_signaling_Main_Pathway - Reactome 1.3	0.492941	0.467409
AHR_Pathway - Primary 1.4	0.543255	0.467038
biocarta_mechanisms_of_transcriptional_repression_by_dna_methylation_Main_Pathway - Biocarta 1.2	0.477832	0.464515
biocarta_mechanisms_of_transcriptional_repression_by_dna_methylation_Pathway_(histone_deacetylation) - Biocarta 1.2	0.477832	0.464515
reactome_Insulin_processing_Main_Pathway - Reactome 1.3	0.564484	0.463933
NCI_Aurora_A_signaling_Pathway_(spindle_assembly) - NCI 1.2	0.546739	0.463896
reactome_Activation_of_Matrix_Metalloproteinases_Main_Pathway - Reactome 1.3	0.441524	0.463797
KEGG_Sphingolipid_metabolism_Main_Pathway - KEGG Adjusted 1.5	0.44514	0.463772
NCI_Signaling_events_regulated_by_Ret_tyrosine_kinase_Main_Pathway - NCI 1.2	0.471396	0.463426
reactome_E2F_mediated_regulation_of_DNA_replication_Main_Pathway - Reactome 1.3	0.531536	0.462879
NCI_ALK1_signaling_events_Main_Pathway - NCI 1.2	0.454728	0.462832
reactome_Polo_like_kinase_mediated_events_Main_Pathway - Reactome 1.3	0.452184	0.462622
KEGG_Colorectal_cancer_Main_Pathway - KEGG Adjusted 1.5	0.569864	0.462412
KEGG_Alcoholism_Main_Pathway - KEGG Adjusted 1.5	0.473677	0.462152
KEGG_Propanoate_metabolism_Main_Pathway - KEGG Adjusted 1.5	0.484282	0.462016
NCI_LPA_receptor_mediated_events_Pathway_(cAMP_biosynthetic_process) - NCI 1.2	0.475597	0.461868
IGF1R_Signaling_Pathway_Protein_Synthesis - Primary 1.4	0.495004	0.46162
biocarta_regulators_of_bone_mineralization_Main_Pathway - Biocarta 1.2	0.407633	0.461608
reactome_Synthesis_of_bile_acids_and_bile_salts_via_24_hydroxycholesterol_Main_Pathway - Reactome 1.3	0.486971	0.46115
biocarta_lissencephaly_gene_lis1_in_neuronal_migration_and_development_Main_Pathway - Biocarta 1.2	0.464344	0.461076
reactome_AKT_phosphorylates_targets_in_the_cytosol_Main_Pathway - Reactome 1.3	0.458568	0.460346
KEGG_Gastric_acid_secretion_Main_Pathway - KEGG Adjusted 1.5	0.444067	0.460235
reactome_RIP_mediated_NFkB_activation_via_ZBP1_Main_Pathway - Reactome 1.3	0.489422	0.460223
biocarta_regulation_of_ck1_cdk5_by_type_1_glutamate_receptors_Main_Pathway - Biocarta 1.2	0.46058	0.460161
NCI_Arf6_trafficking_events_Pathway_(cell_adhesion_mediated_by_integrin) - NCI 1.2	0.418448	0.459134
reactome_Presynaptic_function_of_Kainate_receptors_Main_Pathway - Reactome 1.3	0.473789	0.458516
NCI_Beta1_integrin_cell_surface_interactions_Main_Pathway - NCI 1.2	0.386546	0.45791
Ras_Pathway_Golgi_Trafficking_and_Vesicle_Formation - Primary 1.4	0.387544	0.454236
NCI_Aurora_A_signaling_Pathway_(protein_catabolic_process) - NCI 1.2	0.494708	0.453296
KEGG_Histidine_metabolism_Main_Pathway - KEGG Adjusted 1.5	0.509078	0.449524
reactome_Purine_catabolism_Main_Pathway - Reactome 1.3	0.47394	0.447347
Ubiquitin-Proteasome_Dependent_Proteolysis_Pathway - Primary 1.4	0.468655	0.446815
Akt_Signaling_Pathway_Acetylation_of_proteins - Primary 1.4	0.408142	0.446407
reactome_Prefoldin_mediated_transfer_of_substrate_to_CCT_TriC_Main_Pathway - Reactome 1.3	0.48661	0.445776
NCI_Nongenotropic_Androgen_signaling_Pathway_(cell_proliferation) - NCI 1.2	0.41953	0.445145
KEGG_Protein_processing_in_endoplasmic_reticulum_Main_Pathway - KEGG Adjusted 1.5	0.457219	0.444317
Akt_Signaling_Pathway_ERK_mediated_apoptosis - Primary 1.4	0.433825	0.443612
biocarta_il_6_signaling_Main_Pathway - Biocarta 1.2	0.460829	0.443216
reactome_DARPP_32_events_Main_Pathway - Reactome 1.3	0.415054	0.443117
ATM_Pathway - Primary 1.4	0.415028	0.442919
biocarta_insulin_signaling_Main_Pathway - Biocarta 1.2	0.463283	0.442486
KEGG_Circadian_rhythm_Main_Pathway - KEGG Adjusted 1.5	0.453931	0.442473
reactome_Insulin_receptor_recycling_Main_Pathway - Reactome 1.3	0.494179	0.442226
NCI_Signaling_events_mediated_by_TCPTP_Main_Pathway - NCI 1.2	0.448499	0.440062
KEGG_Axon_guidance_Main_Pathway - KEGG Adjusted 1.5	0.490232	0.4388
NCI_Nongenotropic_Androgen_signaling_Main_Pathway - NCI 1.2	0.45482	0.438009
IGF1R_Signaling_Pathway_Gene_Expression_Proliferation_Growth_Survival_via_NFAT5_CREB3 - Primary 1.4	0.383559	0.436524
NCI_Arf6_signaling_events_Main_Pathway - NCI 1.2	0.457395	0.436141
KEGG_Tyrosine_metabolism_Main_Pathway - KEGG Adjusted 1.5	0.526082	0.434768
NCI_LKB1_signaling_events_Pathway_(establishment_of_cell_polarity) - NCI 1.2	0.4291	0.433148
reactome_pre_mRNA_splicing_Main_Pathway - Reactome 1.3	0.398372	0.432938
NCI_Neurotrophic_factor_mediated_Trk_receptor_signaling_Main_Pathway - NCI 1.2	0.476528	0.431626
KEGG_Pentose_phosphate_Main_Pathway - KEGG Adjusted 1.5	0.446595	0.430884
reactome_RIG_I_MDA5_mediated_induction_of_IFN_alpha_beta_pathways_Main_Pathway - Reactome 1.3	0.464137	0.429079
NCI_ALK2_signaling_events_Main_Pathway - NCI 1.2	0.520144	0.427916
KEGG_Pathogenic_Escherichia_coli_infection_Main_Pathway - KEGG Adjusted 1.5	0.417329	0.427335
reactome_ABC_family_proteins_mediated_transport_Main_Pathway - Reactome 1.3	0.532834	0.426841
KEGG_Huntington_s_disease_Main_Pathway - KEGG Adjusted 1.5	0.480993	0.426246
CD16_Pathway_in_Natural_Killer_cells - Cytoskeleton 1.2	0.44694	0.425603
reactome_Synthesis_of_PIPs_at_the_early_endosome_membrane_Main_Pathway - Reactome 1.3	0.416408	0.425071
NCI_LPA_receptor_mediated_events_Main_Pathway - NCI 1.2	0.446831	0.423686
KEGG_Glycosphingolipid_biosynthesis_globo_series_Main_Pathway - KEGG Adjusted 1.5	0.427993	0.422907
NCI_Endogenous_TLR_signaling_Main_Pathway - NCI 1.2	0.511172	0.422263
biocarta_induction_of_apoptosis_through_dr3_and_dr4_5_death_receptors_Pathway_(Pathway_degradation_of_CASP3_CASP10_CASP10) - Biocarta 1.2	0.438046	0.421163
NCI_ErbB2_ErbB3_signaling_events_Main_Pathway - NCI 1.2	0.45219	0.418701
biocarta_role_of_erbb2_in_signal_transduction_and_oncology_Main_Pathway - Biocarta 1.2	0.488043	0.418689
KEGG_Steroid_biosynthesis_Main_Pathway - KEGG Adjusted 1.5	0.398834	0.418157
TNF_Signaling_Pathway_Gene_Expression_and_Cell_Survival_via_FOS_NFKB2_JUN_ELK1_ATF6 - Primary 1.4	0.431258	0.417365
reactome_Interferon_alpha_beta_signaling_Main_Pathway - Reactome 1.3	0.431152	0.417106
TNF_Signaling_Pathway_Apoptosis - Primary 1.4	0.400897	0.416945
TGF-Beta_Pathway - Primary 1.4	0.43924	0.416549
HGF_Pathway_Regulation_of_Cytoskeleton_Cell_Polarity_and_Cell_Motility - Primary 1.4	0.501179	0.416265
KEGG_GABAergic_synapse_Main_Pathway - KEGG Adjusted 1.5	0.430166	0.414657
NCI_Signaling_events_mediated_by_TCPTP_Pathway_(positive_regulation_of_S_phase_of_mitotic_cell_cycle) - NCI 1.2	0.412747	0.414212
HIF1Alpha_Pathway - Primary 1.4	0.436025	0.413605
TGF-Beta_Pathway_Transciption_Arrested_Growth_Apoptosis - Primary 1.4	0.44802	0.4129
TGF-Beta_Pathway_Transciption_Cell_Growth_and_Mobility_and_Angiogenesis - Primary 1.4	0.44802	0.4129
biocarta_internal_ribosome_entry_Main_Pathway - Biocarta 1.2	0.394085	0.411973
biocarta_internal_ribosome_entry_Pathway_(translational_initiation) - Biocarta 1.2	0.394085	0.411973
D-imyoi-inositol_145-trisphosphate_degradation - Metabolism 1.4	0.419232	0.410526
reactome_Signaling_by_NOTCH4_Main_Pathway - Reactome 1.3	0.406713	0.410489
HGF_Pathway_Cell_Adhesion_and_Cell_Migration - Primary 1.4	0.376401	0.409412
reactome_ADP_signalling_through_P2Y_purinoceptor_12_Main_Pathway - Reactome 1.3	0.395774	0.409363
reactome_Downregulation_of_SMAD2_3_SMAD4_transcriptional_activity_Main_Pathway - Reactome 1.3	0.443247	0.406432
reactome_Activation_of_the_AP_1_family_of_transcription_factors_Main_Pathway - Reactome 1.3	0.453104	0.403315
Ras_Pathway_Increased_T-cell_Adhesion - Primary 1.4	0.377469	0.402387
NCI_Integrins_in_angiogenesis_Pathway_(angiogenesis) - NCI 1.2	0.445004	0.401311
biocarta_mets_affect_on_macrophage_differentiation_Main_Pathway - Biocarta 1.2	0.45861	0.40094
KEGG_Glycosaminoglycan_biosynthesis_keratan_sulfate_Main_Pathway - KEGG Adjusted 1.5	0.366819	0.400804
NCI_Arf1_Main_Pathway - NCI 1.2	0.387204	0.400309
reactome_Interleukin_1_signaling_Main_Pathway - Reactome 1.3	0.488889	0.397823
biocarta_role_of_erk5_in_neuronal_survival_Pathway_(cell_survival) - Biocarta 1.2	0.380121	0.397786
Akt_Signaling_Pathway_NF-kB_pathway - Primary 1.4	0.401536	0.395993
HIF1Alpha_Pathway_p53_Hypoxia_Pathway - Primary 1.4	0.432449	0.395832
KEGG_Spliceosome_Main_Pathway - KEGG Adjusted 1.5	0.37865	0.395733
IGF1R_Signaling_Pathway_Cell_Migration - Primary 1.4	0.360661	0.395127
NCI_Neurotrophic_factor_mediated_Trk_receptor_signaling_Pathway_(MAPKKK_cascade) - NCI 1.2	0.387407	0.395102
reactome_Hormone_sensitive_lipase_HSL_mediated_triacylglycerol_hydrolysis_Main_Pathway - Reactome 1.3	0.438885	0.395015
NCI_E_cadherin_signaling_in_keratinocytes_Pathway_(keratinocyte_differentiation) - NCI 1.2	0.302886	0.392393
biocarta_mapkinase_signaling_Main_Pathway - Biocarta 1.2	0.462418	0.391602
biocarta_influence_of_ras_and_rho_proteins_on_g1_to_s_transition_Main_Pathway - Biocarta 1.2	0.422571	0.390773
NCI_BCR_signaling_Pathway_(cytokine_secretion) - NCI 1.2	0.411594	0.390093
3-phosphoinositide_degradation - Metabolism 1.4	0.484917	0.389722
reactome_RNA_Polymerase_II_Pre_transcription_Events_Main_Pathway - Reactome 1.3	0.365847	0.38637
KEGG_Nicotinate_and_nicotinamide_metabolism_Main_Pathway - KEGG Adjusted 1.5	0.403939	0.386011
NCI_Endogenous_TLR_signaling_Pathway_(regulation_of_apoptosis) - NCI 1.2	0.550133	0.385986
NCI_Endogenous_TLR_signaling_Pathway_(regulation_of_cell_proliferation) - NCI 1.2	0.550133	0.385986
NCI_Endogenous_TLR_signaling_Pathway_(regulation_of_interleukin_1_beta_production) - NCI 1.2	0.550133	0.385986
reactome_RNA_Polymerase_II_Transcription_Elongation_Main_Pathway - Reactome 1.3	0.336086	0.384972
NCI_E_cadherin_signaling_in_keratinocytes_Pathway_(adherens_junction_organization) - NCI 1.2	0.286012	0.384329
NCI_Lissencephaly_gene_LIS1_in_neuronal_migration_and_development_Main_Pathway - NCI 1.2	0.419682	0.384094
NCI_Neurotrophic_factor_mediated_Trk_receptor_signaling_Pathway_(neuron_projection_morphogenesis) - NCI 1.2	0.384239	0.381596
reactome_Signaling_by_FGFR_mutants_Main_Pathway - Reactome 1.3	0.420062	0.381385
NCI_Signaling_events_mediated_by_TCPTP_Pathway_(macrophage_differentiation) - NCI 1.2	0.340434	0.381311
KEGG_Dilated_cardiomyopathy_Main_Pathway - KEGG Adjusted 1.5	0.295357	0.378367
KEGG_Hypertrophic_cardiomyopathy_HCM__Main_Pathway - KEGG Adjusted 1.5	0.295357	0.378367
KEGG_Pancreatic_cancer_Main_Pathway - KEGG Adjusted 1.5	0.333276	0.378318
Calcium2+_Signaling - Cytoskeleton 1.2	0.368256	0.377217
NCI_Signaling_events_mediated_by_Hepatocyte_Growth_Factor_Receptor_c_Met__Pathway_(positive_regulation_of_tyrosine_phosphorylation_of_STAT_protein) - NCI 1.2	0.429138	0.375832
reactome_Pre_NOTCH_Processing_in_Golgi_Main_Pathway - Reactome 1.3	0.392558	0.375448
NCI_Endothelins_Pathway_(cAMP_biosynthetic_process) - NCI 1.2	0.345208	0.37462
HGF_Pathway_Cell_Scattering - Primary 1.4	0.414952	0.374409
HGF_Pathway_Cell_Survival - Primary 1.4	0.414952	0.374409
reactome_Signaling_by_BMP_Main_Pathway - Reactome 1.3	0.42919	0.374236
Ras_Pathway_Apoptosis - Primary 1.4	0.427084	0.371664
NCI_EPHA_forward_signaling_Pathway_(cell_cell_adhesion) - NCI 1.2	0.408399	0.370711
NCI_EPHA_forward_signaling_Pathway_(regulation_of_stress_fiber_assembly) - NCI 1.2	0.408399	0.370711
reactome_Activation_of_G_protein_gated_Potassium_channels_Main_Pathway - Reactome 1.3	0.379136	0.370204
reactome_Inhibition_of_voltage_gated_Ca2_channels_via_Gbeta_gamma_subunits_Main_Pathway - Reactome 1.3	0.379136	0.370204
IGF1R_Signaling_Pathway_Cell_Survival - Primary 1.4	0.383306	0.369833
NCI_Beta2_integrin_cell_surface_interactions_Main_Pathway - NCI 1.2	0.300981	0.369709
KEGG_Thyroid_hormone_synthesis_Main_Pathway - KEGG Adjusted 1.5	0.324352	0.368002
NCI_Beta3_integrin_cell_surface_interactions_Main_Pathway - NCI 1.2	0.315424	0.367767
NCI_EPHA_forward_signaling_Pathway_(axon_guidance) - NCI 1.2	0.401529	0.366753
reactome_Activation_of_NF_kappaB_in_B_cells_Main_Pathway - Reactome 1.3	0.38689	0.366357
biocarta_regulation_of_pgc_1a_Main_Pathway - Biocarta 1.2	0.395687	0.366184
KEGG_Folate_biosynthesis_Main_Pathway - KEGG Adjusted 1.5	0.417622	0.36376
reactome_Activated_NOTCH1_Transmits_Signal_to_the_Nucleus_Main_Pathway - Reactome 1.3	0.374032	0.363426
KEGG_Ubiquitin_mediated_proteolysis_Main_Pathway - KEGG Adjusted 1.5	0.393378	0.363067
FAK_Pathway - Cytoskeleton 1.2	0.379784	0.362103
reactome_RNA_Pol_II_CTD_phosphorylation_and_interaction_with_CE_Main_Pathway - Reactome 1.3	0.327146	0.362041
KEGG_Basal_transcription_factors_Main_Pathway - KEGG Adjusted 1.5	0.3852	0.361348
KEGG_Amino_sugar_and_nucleotide_sugar_metabolism_Main_Pathway - KEGG Adjusted 1.5	0.37039	0.360247
reactome_RMTs_methylate_histone_arginines_Main_Pathway - Reactome 1.3	0.355469	0.359023
reactome_Dual_incision_reaction_in_TC_NER_Main_Pathway - Reactome 1.3	0.325171	0.358071
reactome_ADP_signalling_through_P2Y_purinoceptor_1_Main_Pathway - Reactome 1.3	0.381984	0.356994
NCI_Arf6_trafficking_events_Pathway_(clathrin_coat_assembly) - NCI 1.2	0.255574	0.354261
TGF-Beta_Pathway_Epithelial_Mesenchymal_Transdifferentiation - Primary 1.4	0.351818	0.352616
KEGG_Protein_export_Main_Pathway - KEGG Adjusted 1.5	0.3471	0.351119
NCI_Arf6_trafficking_events_Pathway_(calcium_ion_dependent_exocytosis) - NCI 1.2	0.228738	0.350649
NCI_E_cadherin_signaling_in_keratinocytes_Main_Pathway - NCI 1.2	0.303828	0.350612
KEGG_Glutamatergic_synapse_Main_Pathway - KEGG Adjusted 1.5	0.447342	0.350266
RANK_Signaling_in_Osteoclasts_Pathway_Resorption - Primary 1.4	0.400946	0.350229
reactome_ECM_proteoglycans_Main_Pathway - Reactome 1.3	0.354796	0.349499
reactome_Signaling_by_NOTCH3_Main_Pathway - Reactome 1.3	0.422375	0.347038
3-phosphoinositide_biosynthesis - Metabolism 1.4	0.360132	0.34684
KEGG_Peroxisome_Main_Pathway - KEGG Adjusted 1.5	0.398838	0.346803
reactome_Activation_of_IRF3_IRF7_mediated_by_TBK1_IKK_epsilon_Main_Pathway - Reactome 1.3	0.392437	0.344762
NCI_E_cadherin_signaling_in_keratinocytes_Pathway_(apoptosis) - NCI 1.2	0.263191	0.342449
reactome_repression_of_WNT_target_genes_Main_Pathway - Reactome 1.3	0.441734	0.340829
TCA_cycle - Metabolism 1.4	0.350903	0.335634
KEGG_Renin_angiotensin_system_Main_Pathway - KEGG Adjusted 1.5	0.402845	0.334261
reactome_Prostacyclin_signalling_through_prostacyclin_receptor_Main_Pathway - Reactome 1.3	0.345102	0.333754
NCI_CD40_CD40L_signaling_Main_Pathway - NCI 1.2	0.353839	0.333222
Ras_Pathway_Cell-Cell_Junctions - Primary 1.4	0.400246	0.332653
NCI_Notch_mediated_HES_HEY_network_Main_Pathway - NCI 1.2	0.348054	0.332566
NCI_ErbB2_ErbB3_signaling_events_Pathway_(myelination) - NCI 1.2	0.349861	0.331874
CDC42_Pathway - Cytoskeleton 1.2	0.384142	0.331144
reactome_IRF3_mediated_induction_of_type_I_IFN_Main_Pathway - Reactome 1.3	0.334542	0.330204
reactome_Degradation_of_beta_catenin_by_the_destruction_complex_Main_Pathway - Reactome 1.3	0.336767	0.330105
NCI_LKB1_signaling_events_Pathway_(Pathway_positive_regulation_of_CREB_transcription_factor_activity_via_CRTC2) - NCI 1.2	0.361059	0.327619
NCI_Signaling_events_mediated_by_VEGFR1_and_VEGFR2_Main_Pathway - NCI 1.2	0.38771	0.327322
Hedgehog_Signaling_in_Mammals_Pathway - Primary 1.4	0.362886	0.323995
reactome_Dissolution_of_Fibrin_Clot_Main_Pathway - Reactome 1.3	0.355554	0.320853
reactome_Signaling_by_NODAL_Main_Pathway - Reactome 1.3	0.334221	0.320779
reactome_Striated_Muscle_Contraction_Main_Pathway - Reactome 1.3	0.273806	0.318689
chondroitin_sulfate_biosynthesis - Metabolism 1.4	0.284651	0.318171
dermatan_sulfate_biosynthesis - Metabolism 1.4	0.284651	0.318171
heparan_sulfate_biosynthesis - Metabolism 1.4	0.284651	0.318171
KEGG_RNA_polymerase_Main_Pathway - KEGG Adjusted 1.5	0.293284	0.317897
reactome_Signaling_by_constitutively_active_EGFR_Main_Pathway - Reactome 1.3	0.407703	0.317675
Hedgehog_Signaling_in_Mammals_no_Tubulin_Pathway - Primary 1.4	0.28496	0.316314
fatty_acid_beta-oxidation_peroxisome - Metabolism 1.4	0.394248	0.316104
reactome_Synthesis_secretion_and_inactivation_of_Glucagon_like_Peptide_1_GLP_1__Main_Pathway - Reactome 1.3	0.351342	0.31603
reactome_Synthesis_secretion_and_inactivation_of_Glucose_dependent_Insulinotropic_Polypeptide_GIP__Main_Pathway - Reactome 1.3	0.351342	0.31603
biocarta_inactivation_of_gsk3_by_akt_causes_accumulation_of_b_catenin_in_alveolar_macrophages_Main_Pathway - Biocarta 1.2	0.310964	0.313878
reactome_Deadenylation_of_mRNA_Main_Pathway - Reactome 1.3	0.296024	0.312146
KEGG_Phagosome_Main_Pathway - KEGG Adjusted 1.5	0.299619	0.311404
NCI_ALK1_signaling_events_Pathway_(endothelial_cell_proliferation) - NCI 1.2	0.328064	0.310056
TRAF_Pathway_Direct_Antimicrobial_Response_and_Cell-Mediated_Immunity_and_Apoptosis_of_Host_Cell - Primary 1.4	0.384359	0.309771
reactome_Iron_uptake_and_transport_Main_Pathway - Reactome 1.3	0.269637	0.308967
KEGG_Legionellosis_Main_Pathway - KEGG Adjusted 1.5	0.437429	0.303315
reactome_Hyaluronan_uptake_and_degradation_Main_Pathway - Reactome 1.3	0.33393	0.302907
NCI_N_cadherin_signaling_events_Pathway_(actin_filament_polymerization) - NCI 1.2	0.233283	0.301818
biocarta_lissencephaly_gene_lis1_in_neuronal_migration_and_development_Pathway_(retrograde_axon_cargo_transport) - Biocarta 1.2	0.340234	0.299394
reactome_RNA_Polymerase_II_HIV_Promoter_Escape_Main_Pathway - Reactome 1.3	0.293642	0.299171
reactome_RNA_Polymerase_II_Promoter_Escape_Main_Pathway - Reactome 1.3	0.293642	0.299171
NCI_Signaling_events_mediated_by_TCPTP_Pathway_(regulation_of_gluconeogenesis) - NCI 1.2	0.312039	0.296005
reactome_Activation_of_the_phototransduction_cascade_Main_Pathway - Reactome 1.3	0.321426	0.295399
bile_acid_biosynthesis_neutral_pathway - Metabolism 1.4	0.319833	0.293878
Cell_Adhesion_Regulated_by_CDHs - Cytoskeleton 1.2	0.366177	0.292059
KEGG_Hedgehog_signaling_Main_Pathway - KEGG Adjusted 1.5	0.422281	0.289029
reactome_APC_C_Cdc20_mediated_degradation_of_Securin_Main_Pathway - Reactome 1.3	0.288684	0.287965
reactome_APC_C_Cdh1_mediated_degradation_of_Cdc20_and_other_APC_C_Cdh1_targeted_proteins_in_late_mitosis_early_G1_Main_Pathway - Reactome 1.3	0.288684	0.287965
reactome_RNA_Polymerase_III_Transcription_Initiation_From_Type_1_Promoter_Main_Pathway - Reactome 1.3	0.25262	0.286852
reactome_RNA_Polymerase_III_Transcription_Initiation_From_Type_2_Promoter_Main_Pathway - Reactome 1.3	0.25262	0.286852
Angiotensin-PTK2B_Pathway - Cytoskeleton 1.2	0.318277	0.286061
KEGG_Tight_junction_Main_Pathway - KEGG Adjusted 1.5	0.197204	0.282783
reactome_Integrin_alphaIIb_beta3_signaling_Main_Pathway - Reactome 1.3	0.171278	0.280952
KEGG_Lysosome_Main_Pathway - KEGG Adjusted 1.5	0.278179	0.280062
reactome_Downregulation_of_TGF_beta_receptor_signaling_Main_Pathway - Reactome 1.3	0.290542	0.278627
reactome_Deposition_of_new_CENPA_containing_nucleosomes_at_the_centromere_Main_Pathway - Reactome 1.3	0.389372	0.277823
NCI_E_cadherin_signaling_in_the_nascent_adherens_junction_Main_Pathway - NCI 1.2	0.215148	0.270711
NCI_N_cadherin_signaling_events_Pathway_(regulation_of_cell_cell_adhesion) - NCI 1.2	0.243243	0.269697
reactome_Processing_of_Capped_Intron_Containing_Pre_mRNA_Main_Pathway - Reactome 1.3	0.258531	0.261818
NCI_Nectin_adhesion_Main_Pathway - NCI 1.2	0.189957	0.260631
NCI_Sphingosine_1_phosphate_S1P_Main_Pathway - NCI 1.2	0.186543	0.260532
reactome_DNA_Damage_Telomere_Stress_Induced_Senescence_Main_Pathway - Reactome 1.3	0.306544	0.254558
biocarta_oxidative_stress_induced_gene_expression_via_nrf2_Main_Pathway - Biocarta 1.2	0.236775	0.243866
NCI_Notch_signaling_Main_Pathway - NCI 1.2	0.258484	0.24141
Chemotaxis_Driven_by_C5a - Cytoskeleton 1.2	0.281842	0.241323
NCI_Signaling_events_mediated_by_TCPTP_Pathway_(G1_S_transition_of_mitotic_cell_cycle) - NCI 1.2	0.26117	0.239097
NCI_Signaling_events_mediated_by_TCPTP_Pathway_(MAPKKK_cascade) - NCI 1.2	0.26117	0.239097
NCI_N_cadherin_signaling_events_Main_Pathway - NCI 1.2	0.270657	0.235238
NCI_AP_1_transcription_factor_network_Main_Pathway - NCI 1.2	0.231761	0.23457
KEGG_Transcriptional_misregulation_in_cancer_Main_Pathway - KEGG Adjusted 1.5	0.198481	0.234236
reactome_RNA_Polymerase_III_Transcription_Initiation_From_Type_3_Promoter_Main_Pathway - Reactome 1.3	0.196342	0.232888
KEGG_Fanconi_anemia_Main_Pathway - KEGG Adjusted 1.5	0.304061	0.226234
KEGG_Wnt_signaling_Main_Pathway - KEGG Adjusted 1.5	0.318916	0.225467
reactome_Abortive_elongation_of_HIV_1_transcript_in_the_absence_of_Tat_Main_Pathway - Reactome 1.3	0.181019	0.220186
reactome_RNA_Polymerase_III_Chain_Elongation_Main_Pathway - Reactome 1.3	0.194593	0.218194
reactome_Integrin_cell_surface_interactions_Main_Pathway - Reactome 1.3	0.191226	0.217551
NCI_Signaling_events_mediated_by_PRL_Main_Pathway - NCI 1.2	0.211262	0.214212
NCI_Signaling_events_mediated_by_VEGFR1_and_VEGFR2_Pathway_(focal_adhesion_assembly) - NCI 1.2	0.200188	0.213346
biocarta_proteasome_complex_Pathway_(Pathway_degradation_of_PSMA1) - Biocarta 1.2	0.202039	0.19906
reactome_Synthesis_of_PA_Main_Pathway - Reactome 1.3	0.236606	0.193383
NCI_E_cadherin_signaling_in_the_nascent_adherens_junction_Pathway_(regulation_of_actin_nucleation) - NCI 1.2	0.0827787	0.191701
reactome_temp_Post-translational_modification_synthesis_of_GPI-anchored_proteins - Reactome 1.3	0.225617	0.191391
KEGG_Selenocompound_metabolism_Main_Pathway - KEGG Adjusted 1.5	0.211174	0.184119
reactome_Synthesis_of_PIPs_at_the_Golgi_membrane_Main_Pathway - Reactome 1.3	0.231143	0.182276
CDP-diacylglycerol_biosynthesis - Metabolism 1.4	0.140431	0.180544
reactome_Detoxification_of_Reactive_Oxygen_Species_Main_Pathway - Reactome 1.3	0.187424	0.179481
reactome_Synthesis_secretion_and_deacylation_of_Ghrelin_Main_Pathway - Reactome 1.3	0.164655	0.175349
reactome_Synthesis_of_PC_Main_Pathway - Reactome 1.3	0.286366	0.173346
NCI_Signaling_events_mediated_by_the_Hedgehog_family_Pathway_(receptor_mediated_endocytosis) - NCI 1.2	0.326384	0.171342
NCI_Signaling_events_mediated_by_VEGFR1_and_VEGFR2_Pathway_(regulation_of_vascular_permeability) - NCI 1.2	0.189299	0.168312
NCI_Signaling_events_mediated_by_the_Hedgehog_family_Main_Pathway - NCI 1.2	0.304618	0.165541
NCI_Signaling_events_mediated_by_VEGFR1_and_VEGFR2_Pathway_(angiogenesis) - NCI 1.2	0.159442	0.161459
biocarta_hypoxia_inducible_factor_in_the_cardivascular_system_Main_Pathway - Biocarta 1.2	0.2171	0.149994
reactome_Ion_transport_by_P_type_ATPases_Main_Pathway - Reactome 1.3	0.0779878	0.137081
reactome_Initial_triggering_of_complement_Main_Pathway - Reactome 1.3	0.139731	0.107718
reactome_Activation_of_DNA_fragmentation_factor_Main_Pathway - Reactome 1.3	0.0345945	0.0985529
KEGG_PPAR_signaling_Main_Pathway - KEGG Adjusted 1.5	0.129337	0.09765
KEGG_Complement_and_coagulation_cascades_Main_Pathway - KEGG Adjusted 1.5	0.13967	0.0706988
reactome_regulation_of_FZD_by_ubiquitination_Main_Pathway - Reactome 1.3	0.0182922	0.066778
biocarta_induction_of_apoptosis_through_dr3_and_dr4_5_death_receptors_Main_Pathway - Biocarta 1.2	0.130577	0.0531973
reactome_ABCA_transporters_in_lipid_homeostasis_Main_Pathway - Reactome 1.3	0.144141	0.0489425
biocarta_induction_of_apoptosis_through_dr3_and_dr4_5_death_receptors_Pathway_(apoptosis) - Biocarta 1.2	0.118847	0.0477427
reactome_Intrinsic_Pathway_Main_Pathway - Reactome 1.3	-0.0233939	0.0336673
reactome_Sphingolipid_de_novo_biosynthesis_Main_Pathway - Reactome 1.3	-0.0446554	0.00285714
NCI_N_cadherin_signaling_events_Pathway_(myoblast_differentiation) - NCI 1.2	-0.0231775	-0.00410637
biocarta_multi_step_regulation_of_transcription_by_pitx2_Main_Pathway - Biocarta 1.2	0.0391407	-0.0285962
chondroitin_sulfate_biosynthesis_late_stages - Metabolism 1.4	NA	NA
heparan_sulfate_biosynthesis_late_stages - Metabolism 1.4	NA	NA
reactome_Synthesis_of_glycosylphosphatidylinositol_GPI__Main_Pathway - Reactome 1.3	NA	NA

## Sheet: Glioblastoma_Multiforme
Pathway	Pearson	Spearman
Tumour_Infiltration_Pathway - Primary 1.4	0.894392	0.912505
reactome_temp_Immunoregulatory_interactions_between_a_Lymphoid_and_a_non-Lymphoid_cell - Reactome 1.3	0.851836	0.88616
KEGG_Legionellosis_Main_Pathway - KEGG Adjusted 1.5	0.828047	0.885331
NCI_BCR_signaling_Main_Pathway - NCI 1.2	0.841165	0.880421
KEGG_Osteoclast_differentiation_Main_Pathway - KEGG Adjusted 1.5	0.834703	0.87765
FCGR3A-mediated_phagocytosis - Cytoskeleton 1.2	0.848747	0.87572
Development_of_Immune_Synapse - Cytoskeleton 1.2	0.840478	0.870835
reactome_Dissolution_of_Fibrin_Clot_Main_Pathway - Reactome 1.3	0.813876	0.859382
reactome_Activation_of_the_pre_replicative_complex_Main_Pathway - Reactome 1.3	0.846853	0.85269
KEGG_Lysosome_Main_Pathway - KEGG Adjusted 1.5	0.844355	0.851552
KEGG_Fc_epsilon_RI_signaling_Main_Pathway - KEGG Adjusted 1.5	0.832279	0.850328
HGF_Pathway_Cell_Adhesion_and_Cell_Migration - Primary 1.4	0.817612	0.849796
reactome_Interleukin_2_signaling_Main_Pathway - Reactome 1.3	0.835002	0.849549
reactome_Polymerase_switching_Main_Pathway - Reactome 1.3	0.84773	0.848262
reactome_Polymerase_switching_on_the_C_strand_of_the_telomere_Main_Pathway - Reactome 1.3	0.84773	0.848262
IGF1R_Signaling_Pathway_Cell_Migration - Primary 1.4	0.802337	0.847792
Ras_Pathway_Increased_T-cell_Adhesion - Primary 1.4	0.821687	0.846914
reactome_Smooth_Muscle_Contraction_Main_Pathway - Reactome 1.3	0.819181	0.842016
NCI_Beta2_integrin_cell_surface_interactions_Main_Pathway - NCI 1.2	0.79555	0.840482
NCI_Endogenous_TLR_signaling_Pathway_(regulation_of_apoptosis) - NCI 1.2	0.76253	0.833247
NCI_Endogenous_TLR_signaling_Pathway_(regulation_of_cell_proliferation) - NCI 1.2	0.76253	0.833247
NCI_Endogenous_TLR_signaling_Pathway_(regulation_of_interleukin_1_beta_production) - NCI 1.2	0.76253	0.833247
NCI_EPO_signaling_Main_Pathway - NCI 1.2	0.795303	0.826605
Cytoskeleton_Reorganization - Cytoskeleton 1.2	0.780038	0.824156
KEGG_Bacterial_invasion_of_epithelial_cells_Main_Pathway - KEGG Adjusted 1.5	0.817561	0.820866
reactome_Activation_of_ATR_in_response_to_replication_stress_Main_Pathway - Reactome 1.3	0.82829	0.816648
NCI_Beta3_integrin_cell_surface_interactions_Main_Pathway - NCI 1.2	0.77008	0.810588
KEGG_Amino_sugar_and_nucleotide_sugar_metabolism_Main_Pathway - KEGG Adjusted 1.5	0.798	0.8094
NCI_Atypical_NF_kappaB_Main_Pathway - NCI 1.2	0.769478	0.809375
reactome_Integrin_alphaIIb_beta3_signaling_Main_Pathway - Reactome 1.3	0.776581	0.808386
NCI_Beta1_integrin_cell_surface_interactions_Main_Pathway - NCI 1.2	0.768258	0.804774
reactome_Integrin_cell_surface_interactions_Main_Pathway - Reactome 1.3	0.759299	0.802944
KEGG_Salivary_secretion_Main_Pathway - KEGG Adjusted 1.5	0.739517	0.801286
KEGG_Arachidonic_acid_metabolism_Main_Pathway - KEGG Adjusted 1.5	0.755551	0.797774
reactome_Dopamine_Neurotransmitter_Release_Cycle_Main_Pathway - Reactome 1.3	0.713362	0.795597
KEGG_Leukocyte_transendothelial_migration_Main_Pathway - KEGG Adjusted 1.5	0.760718	0.792604
NCI_Endogenous_TLR_signaling_Main_Pathway - NCI 1.2	0.748537	0.791416
reactome_Interaction_With_The_Zona_Pellucida_Main_Pathway - Reactome 1.3	0.78285	0.791168
reactome_Synthesis_of_PIPs_at_the_plasma_membrane_Main_Pathway - Reactome 1.3	0.791934	0.790699
reactome_Interleukin_receptor_SHC_signaling_Main_Pathway - Reactome 1.3	0.73026	0.785962
reactome_Synthesis_of_Leukotrienes_LT_and_Eoxins_EX__Main_Pathway - Reactome 1.3	0.730189	0.785244
NCI_Beta5_beta6_beta7_and_beta8_integrin_cell_surface_interactions_Main_Pathway - NCI 1.2	0.774751	0.784143
NCI_Integrins_in_angiogenesis_Main_Pathway - NCI 1.2	0.749488	0.783599
biocarta_il_3_signaling_Main_Pathway - Biocarta 1.2	0.722516	0.782832
reactome_Synthesis_of_bile_acids_and_bile_salts_via_27_hydroxycholesterol_Main_Pathway - Reactome 1.3	0.753881	0.782696
reactome_Acetylcholine_Neurotransmitter_Release_Cycle_Main_Pathway - Reactome 1.3	0.718596	0.781472
D-imyoi-inositol_145-trisphosphate_degradation - Metabolism 1.4	0.805424	0.780779
KEGG_Glycerophospholipid_metabolism_Main_Pathway - KEGG Adjusted 1.5	0.761436	0.778318
reactome_APC_C_Cdc20_mediated_degradation_of_mitotic_proteins_Main_Pathway - Reactome 1.3	0.763479	0.777724
reactome_Inactivation_of_APC_C_via_direct_inhibition_of_the_APC_C_complex_Main_Pathway - Reactome 1.3	0.763479	0.777724
biocarta_il_4_signaling_Main_Pathway - Biocarta 1.2	0.734308	0.770303
reactome_Synthesis_of_bile_acids_and_bile_salts_via_7alpha_hydroxycholesterol_Main_Pathway - Reactome 1.3	0.737278	0.769796
reactome_Activation_of_gene_expression_by_SREBF_SREBP__Main_Pathway - Reactome 1.3	0.74572	0.767767
reactome_Detoxification_of_Reactive_Oxygen_Species_Main_Pathway - Reactome 1.3	0.719024	0.76757
NCI_BCR_signaling_Pathway_(cytokine_secretion) - NCI 1.2	0.760008	0.766988
RANK_Signaling_in_Osteoclasts_Pathway_Resorption - Primary 1.4	0.732574	0.765615
chondroitin_sulfate_biosynthesis_late_stages - Metabolism 1.4	0.749629	0.763859
TRAF_Pathway_Apoptosis - Primary 1.4	0.74836	0.763377
IGF1R_Signaling_Pathway - Primary 1.4	0.724666	0.757588
NCI_Neurotrophic_factor_mediated_Trk_receptor_signaling_Pathway_(Schwann_cell_development) - NCI 1.2	0.702038	0.757316
NCI_Arf6_trafficking_events_Pathway_(cell_adhesion_mediated_by_integrin) - NCI 1.2	0.706123	0.757032
KEGG_Glycosphingolipid_biosynthesis_globo_series_Main_Pathway - KEGG Adjusted 1.5	0.705589	0.75577
FN1_Influence_on_Cell_Motility_via_Integrins - Cytoskeleton 1.2	0.735259	0.755597
reactome_Iron_uptake_and_transport_Main_Pathway - Reactome 1.3	0.689798	0.754261
TNF_Signaling_Pathway_Apoptosis - Primary 1.4	0.730871	0.75222
HMGB1_signaling_through_RAGE - Cytoskeleton 1.2	0.692921	0.752158
reactome_APC_C_Cdc20_mediated_degradation_of_Cyclin_B_Main_Pathway - Reactome 1.3	0.706192	0.750303
NAD_ide_novoi_biosynthesis - Metabolism 1.4	0.737017	0.746716
reactome_RIP_mediated_NFkB_activation_via_ZBP1_Main_Pathway - Reactome 1.3	0.711039	0.745108
biocarta_induction_of_apoptosis_through_dr3_and_dr4_5_death_receptors_Pathway_(apoptosis) - Biocarta 1.2	0.665177	0.744638
reactome_Polo_like_kinase_mediated_events_Main_Pathway - Reactome 1.3	0.713515	0.743933
reactome_ABC_family_proteins_mediated_transport_Main_Pathway - Reactome 1.3	0.69796	0.743562
reactome_APC_Cdc20_mediated_degradation_of_Nek2A_Main_Pathway - Reactome 1.3	0.716248	0.740606
TRAF_Pathway - Primary 1.4	0.72207	0.74026
NCI_ATM_Main_Pathway - NCI 1.2	0.730237	0.738466
TNF_Signaling_Pathway - Primary 1.4	0.747792	0.737291
reactome_Synthesis_of_bile_acids_and_bile_salts_via_24_hydroxycholesterol_Main_Pathway - Reactome 1.3	0.716121	0.735473
biocarta_induction_of_apoptosis_through_dr3_and_dr4_5_death_receptors_Main_Pathway - Biocarta 1.2	0.667615	0.734088
NCI_Signaling_events_mediated_by_TCPTP_Pathway_(macrophage_differentiation) - NCI 1.2	0.632322	0.733568
NCI_Aurora_B_signaling_Main_Pathway - NCI 1.2	0.699115	0.732604
reactome_Activated_point_mutants_of_FGFR2_Main_Pathway - Reactome 1.3	0.685793	0.730019
NCI_Neurotrophic_factor_mediated_Trk_receptor_signaling_Pathway_(neuron_projection_morphogenesis) - NCI 1.2	0.684294	0.729647
IL-2_Pathway - Primary 1.4	0.703865	0.727842
Chemokine_Ligand_2_Signaling - Cytoskeleton 1.2	0.675472	0.725665
reactome_Hyaluronan_uptake_and_degradation_Main_Pathway - Reactome 1.3	0.709635	0.72538
reactome_Interleukin_7_signaling_Main_Pathway - Reactome 1.3	0.730687	0.725343
guanosine_nucleotides_ide_novoi_biosynthesis - Metabolism 1.4	0.713342	0.724304
biocarta_internal_ribosome_entry_Main_Pathway - Biocarta 1.2	0.678154	0.722152
biocarta_internal_ribosome_entry_Pathway_(translational_initiation) - Biocarta 1.2	0.678154	0.722152
NCI_Endothelins_Main_Pathway - NCI 1.2	0.769634	0.72162
KEGG_RNA_transport_Main_Pathway - KEGG Adjusted 1.5	0.717711	0.721546
KEGG_Glycosphingolipid_biosynthesis_ganglio_series_Main_Pathway - KEGG Adjusted 1.5	0.729336	0.720111
KEGG_Ras_signaling_Main_Pathway - KEGG Adjusted 1.5	0.733308	0.718714
bile_acid_biosynthesis_neutral_pathway - Metabolism 1.4	0.673115	0.717291
NCI_Aurora_A_signaling_Pathway_(protein_catabolic_process) - NCI 1.2	0.652811	0.714966
NCI_Neurotrophic_factor_mediated_Trk_receptor_signaling_Main_Pathway - NCI 1.2	0.689723	0.714657
reactome_Degradation_of_the_extracellular_matrix_Main_Pathway - Reactome 1.3	0.666319	0.713717
KEGG_Retinol_metabolism_Main_Pathway - KEGG Adjusted 1.5	0.687926	0.713692
reactome_Inhibition_of_replication_initiation_of_damaged_DNA_by_RB1_E2F1_Main_Pathway - Reactome 1.3	0.706173	0.711478
Chemotaxis_Driven_by_CCR4 - Cytoskeleton 1.2	0.698092	0.711107
Chemotaxis_of_Immune_Cells_During_Allergic_Asthma_and_Eczema_Driven_by_CCR4 - Cytoskeleton 1.2	0.698092	0.711107
KEGG_Endocytosis_Main_Pathway - KEGG Adjusted 1.5	0.69945	0.710241
reactome_snRNP_Assembly_Main_Pathway - Reactome 1.3	0.716568	0.708176
reactome_pre_mRNA_splicing_Main_Pathway - Reactome 1.3	0.716506	0.707384
KEGG_Insulin_secretion_Main_Pathway - KEGG Adjusted 1.5	0.722083	0.706617
NCI_Signaling_events_mediated_by_TCPTP_Pathway_(regulation_of_gluconeogenesis) - NCI 1.2	0.701261	0.705986
KEGG_Nicotinate_and_nicotinamide_metabolism_Main_Pathway - KEGG Adjusted 1.5	0.707318	0.705912
NCI_Signaling_events_mediated_by_TCPTP_Pathway_(G1_S_transition_of_mitotic_cell_cycle) - NCI 1.2	0.696256	0.705467
NCI_Signaling_events_mediated_by_TCPTP_Pathway_(MAPKKK_cascade) - NCI 1.2	0.696256	0.705467
NCI_Integrins_in_angiogenesis_Pathway_(angiogenesis) - NCI 1.2	0.652611	0.703525
CDK5_Signaling_in_Neurons - Cytoskeleton 1.2	0.768474	0.703253
NCI_Endothelins_Pathway_(cAMP_biosynthetic_process) - NCI 1.2	0.689388	0.700965
TGF-Beta_Pathway_Post_Transciptional_G1_Arrest - Primary 1.4	0.682439	0.698627
biocarta_induction_of_apoptosis_through_dr3_and_dr4_5_death_receptors_Pathway_(Pathway_degradation_of_CASP3_CASP10_CASP10) - Biocarta 1.2	0.664688	0.697452
NCI_Signaling_events_mediated_by_VEGFR1_and_VEGFR2_Pathway_(focal_adhesion_assembly) - NCI 1.2	0.673708	0.69697
reactome_DCC_mediated_attractive_signaling_Main_Pathway - Reactome 1.3	0.611699	0.696895
biocarta_nfkb_activation_by_nontypeable_hemophilus_influenzae_Main_Pathway - Biocarta 1.2	0.704094	0.69666
STAT3_Pathway - Primary 1.4	0.662431	0.691676
KEGG_VEGF_signaling_Main_Pathway - KEGG Adjusted 1.5	0.705574	0.690489
NCI_Signaling_events_mediated_by_TCPTP_Pathway_(positive_regulation_of_S_phase_of_mitotic_cell_cycle) - NCI 1.2	0.714919	0.689709
KEGG_p53_signaling_Main_Pathway - KEGG Adjusted 1.5	0.677755	0.689598
Akt_Signaling_Pathway_JNK_mediated_apoptosis - Primary 1.4	0.682006	0.689215
TRAF_Pathway_Direct_Antimicrobial_Response_and_Cell-Mediated_Immunity_and_Apoptosis_of_Host_Cell - Primary 1.4	0.716202	0.688596
reactome_Pyrimidine_catabolism_Main_Pathway - Reactome 1.3	0.651871	0.688077
KEGG_Gastric_acid_secretion_Main_Pathway - KEGG Adjusted 1.5	0.700468	0.685937
3-phosphoinositide_degradation - Metabolism 1.4	0.68328	0.683488
glutathione-mediated_detoxification - Metabolism 1.4	0.667888	0.683352
Akt_Pathway_Regulation_by_GH - Cytoskeleton 1.2	0.659903	0.682066
KEGG_Dilated_cardiomyopathy_Main_Pathway - KEGG Adjusted 1.5	0.677635	0.680186
KEGG_Hypertrophic_cardiomyopathy_HCM__Main_Pathway - KEGG Adjusted 1.5	0.677635	0.680186
KEGG_Spliceosome_Main_Pathway - KEGG Adjusted 1.5	0.681271	0.680049
reactome_Deposition_of_new_CENPA_containing_nucleosomes_at_the_centromere_Main_Pathway - Reactome 1.3	0.704094	0.679691
reactome_Downstream_TCR_signaling_Main_Pathway - Reactome 1.3	0.661123	0.67932
HGF_Pathway_Gene_Expression_via_JUN_STAT3_FOS_ELK1_ETS2 - Primary 1.4	0.723175	0.678887
NCI_ErbB1_downstream_signaling_Pathway_(ruffle_organization) - NCI 1.2	0.655058	0.678776
NCI_ALK1_signaling_events_Pathway_(endothelial_cell_proliferation) - NCI 1.2	0.701806	0.677477
NCI_Signaling_events_mediated_by_TCPTP_Main_Pathway - NCI 1.2	0.640037	0.676524
IL-10_Pathway - Primary 1.4	0.674406	0.67509
reactome_Synthesis_of_Prostaglandins_PG_and_Thromboxanes_TX__Main_Pathway - Reactome 1.3	0.617935	0.674706
ATM_Pathway_G2-Mitosis_progression - Primary 1.4	0.607138	0.674545
ATM_Pathway_G2_M_Checkpoint_Arrest - Primary 1.4	0.607138	0.674545
CD16_Pathway_in_Natural_Killer_cells - Cytoskeleton 1.2	0.61601	0.672195
reactome_Platelet_sensitization_by_LDL_Main_Pathway - Reactome 1.3	0.653511	0.671973
reactome_ISG15_antiviral_mechanism_Main_Pathway - Reactome 1.3	0.710802	0.671033
KEGG_Peroxisome_Main_Pathway - KEGG Adjusted 1.5	0.665281	0.66778
NCI_Alpha_synuclein_signaling_Pathway_(Pathway_negative_regulation_of_transcription_via_TOR1A_SNCA_STUB1_FKBP1A) - NCI 1.2	0.642582	0.6671
NCI_Alpha_synuclein_signaling_Pathway_(Pathway_positive_regulation_of_gene_specific_transcription_via_TOR1A_SNCA_FKBP1A_STUB1) - NCI 1.2	0.642582	0.6671
AHR_Pathway_C-myc_expression_via_RELA - Primary 1.4	0.614516	0.661917
cholesterol_biosynthesis_I - Metabolism 1.4	0.651359	0.660037
cholesterol_biosynthesis_II_via_2425-dihydrolanosterol - Metabolism 1.4	0.651359	0.660037
cholesterol_biosynthesis_III_via_desmosterol - Metabolism 1.4	0.651359	0.660037
KEGG_Histidine_metabolism_Main_Pathway - KEGG Adjusted 1.5	0.684547	0.659555
biocarta_inhibition_of_cellular_proliferation_by_gleevec_Main_Pathway - Biocarta 1.2	0.656706	0.658541
KEGG_Renin_angiotensin_system_Main_Pathway - KEGG Adjusted 1.5	0.631802	0.657464
biocarta_keratinocyte_differentiation_Pathway_(keratinocyte_differentiation) - Biocarta 1.2	0.600103	0.656982
fatty_acid_beta-oxidation_peroxisome - Metabolism 1.4	0.706841	0.656302
NCI_LKB1_signaling_events_Pathway_(Pathway_positive_regulation_of_CREB_transcription_factor_activity_via_CRTC2) - NCI 1.2	0.596082	0.65175
AHR_Pathway_PS2_Gene_expression_via_ESR1 - Primary 1.4	0.601775	0.651602
KEGG_Thyroid_hormone_signaling_Main_Pathway - KEGG Adjusted 1.5	0.667049	0.649858
VEGF_Pathway - Primary 1.4	0.682932	0.649697
biocarta_t_cell_receptor_signaling_Main_Pathway - Biocarta 1.2	0.695608	0.649437
NCI_Alpha_synuclein_signaling_Pathway_(neuron_apoptosis) - NCI 1.2	0.64286	0.647718
HGF_Pathway_Cell_Cycle_Progression - Primary 1.4	0.662101	0.645838
NCI_Lissencephaly_gene_LIS1_in_neuronal_migration_and_development_Main_Pathway - NCI 1.2	0.672959	0.645702
reactome_Interferon_gamma_signaling_Main_Pathway - Reactome 1.3	0.631754	0.642968
Ras_Pathway_Cell-Cell_Junctions - Primary 1.4	0.687961	0.642758
reactome_DSCAM_interactions_Main_Pathway - Reactome 1.3	0.520666	0.642041
Extracellular_Matrix_Remodeling_during_Adhesion - Cytoskeleton 1.2	0.606035	0.641645
reactome_RMTs_methylate_histone_arginines_Main_Pathway - Reactome 1.3	0.65524	0.641163
KEGG_TNF_signaling_Main_Pathway - KEGG Adjusted 1.5	0.667592	0.640544
reactome_RNA_Polymerase_III_Abortive_And_Retractive_Initiation_Main_Pathway - Reactome 1.3	0.656665	0.638924
KEGG_Steroid_biosynthesis_Main_Pathway - KEGG Adjusted 1.5	0.628232	0.638207
Gamma-Aminobutyric_Acid_A_Receptor_Pathway - Cytoskeleton 1.2	0.636462	0.638145
KEGG_Pancreatic_cancer_Main_Pathway - KEGG Adjusted 1.5	0.647442	0.635461
KEGG_Pentose_phosphate_Main_Pathway - KEGG Adjusted 1.5	0.633742	0.634558
Akt_Signaling_Pathway - Primary 1.4	0.643608	0.632628
IL-10_Pathway_Translational_Modulation - Primary 1.4	0.673881	0.631614
TNF_Signaling_Pathway_Gene_Expression_and_Cell_Survival_via_FOS_NFKB2_JUN_ELK1_ATF6 - Primary 1.4	0.659852	0.631156
KEGG_Colorectal_cancer_Main_Pathway - KEGG Adjusted 1.5	0.5971	0.630192
NCI_Netrin_mediated_signaling_events_Main_Pathway - NCI 1.2	0.603314	0.628101
reactome_Signaling_by_Hippo_Main_Pathway - Reactome 1.3	0.58442	0.627718
reactome_Initial_triggering_of_complement_Main_Pathway - Reactome 1.3	0.53697	0.62757
reactome_ABCA_transporters_in_lipid_homeostasis_Main_Pathway - Reactome 1.3	0.674285	0.624267
biocarta_hiv_1_nef_negative_effector_of_fas_and_tnf_Pathway_(Pathway_protein_ubiquitination_of_CHUK) - Biocarta 1.2	0.609053	0.623451
STAT3_Pathway_Growth_Arrest_and_Differentiation - Primary 1.4	0.602526	0.622214
reactome_Activation_of_PPARGC1A_PGC_1alpha_by_phosphorylation_Main_Pathway - Reactome 1.3	0.605988	0.62068
NCI_Signaling_events_mediated_by_PTP1B_Main_Pathway - NCI 1.2	0.604424	0.618565
NCI_Nongenotropic_Androgen_signaling_Pathway_(apoptosis) - NCI 1.2	0.604975	0.618306
NCI_Nongenotropic_Androgen_signaling_Pathway_(cell_proliferation) - NCI 1.2	0.592201	0.618207
NCI_Nongenotropic_Androgen_signaling_Main_Pathway - NCI 1.2	0.601669	0.617106
Cell_Adhesion_Regulated_by_CDHs - Cytoskeleton 1.2	0.569182	0.617056
KEGG_Alcoholism_Main_Pathway - KEGG Adjusted 1.5	0.665829	0.615943
KEGG_Tyrosine_metabolism_Main_Pathway - KEGG Adjusted 1.5	0.630142	0.61572
NCI_Signaling_events_mediated_by_HDAC_Class_I_Pathway_(histone_deacetylation) - NCI 1.2	0.619405	0.615622
AHR_Pathway_Cath_D_expression_via_SP1 - Primary 1.4	0.573787	0.615213
NCI_LKB1_signaling_events_Main_Pathway - NCI 1.2	0.598292	0.614954
reactome_KSRP_destabilizes_mRNA_Main_Pathway - Reactome 1.3	0.620251	0.614496
reactome_E2F_enabled_inhibition_of_pre_replication_complex_formation_Main_Pathway - Reactome 1.3	0.632622	0.61384
NCI_Signaling_events_mediated_by_VEGFR1_and_VEGFR2_Main_Pathway - NCI 1.2	0.585288	0.613111
reactome_Signaling_by_FGFR1_fusion_mutants_Main_Pathway - Reactome 1.3	0.594656	0.6129
KEGG_Complement_and_coagulation_cascades_Main_Pathway - KEGG Adjusted 1.5	0.567417	0.612517
biocarta_regulators_of_bone_mineralization_Main_Pathway - Biocarta 1.2	0.52481	0.609511
NCI_E_cadherin_signaling_in_keratinocytes_Main_Pathway - NCI 1.2	0.615452	0.607421
biocarta_mets_affect_on_macrophage_differentiation_Main_Pathway - Biocarta 1.2	0.623902	0.606852
NCI_Notch_mediated_HES_HEY_network_Main_Pathway - NCI 1.2	0.614034	0.606271
KEGG_Morphine_addiction_Main_Pathway - KEGG Adjusted 1.5	0.623596	0.605603
KEGG_Glycosaminoglycan_biosynthesis_keratan_sulfate_Main_Pathway - KEGG Adjusted 1.5	0.572819	0.604811
CCR3_Pathway_in_Eosinophils - Cytoskeleton 1.2	0.596876	0.603908
NCI_EPHA_forward_signaling_Pathway_(axon_guidance) - NCI 1.2	0.567204	0.603772
reactome_Processing_of_Capped_Intron_Containing_Pre_mRNA_Main_Pathway - Reactome 1.3	0.605117	0.603525
biocarta_regulation_of_pgc_1a_Main_Pathway - Biocarta 1.2	0.710065	0.603117
reactome_Signaling_by_NOTCH4_Main_Pathway - Reactome 1.3	0.5932	0.603018
reactome_Signaling_by_FGFR_mutants_Main_Pathway - Reactome 1.3	0.637175	0.602832
biocarta_mapkinase_signaling_Main_Pathway - Biocarta 1.2	0.597907	0.602808
CDK5_Pathway_in_Central_Nervous_System - Cytoskeleton 1.2	0.604606	0.599567
1D-imyoi-inositol_hexakisphosphate_biosynthesis_II_mammalian - Metabolism 1.4	0.612035	0.599542
KEGG_Type_I_diabetes_mellitus_Main_Pathway - KEGG Adjusted 1.5	0.653214	0.598998
KEGG_Gap_junction_Main_Pathway - KEGG Adjusted 1.5	0.57875	0.598479
KEGG_Arginine_and_proline_metabolism_Main_Pathway - KEGG Adjusted 1.5	0.591668	0.598367
reactome_Signaling_by_NOTCH3_Main_Pathway - Reactome 1.3	0.616531	0.597848
Ras_Pathway_Gene_Expression_Cell_Proliferation_Cell_Survival_Differentiation_Development_Cell_Cycle_Control_Cell_Motility_Tumorigenesis_via_ELK4_ATF2_MEF2D_STAT2_CREB3_CCNA1_MYC_ELK1_JUN_CDK4 - Primary 1.4	0.604252	0.596982
KEGG_Huntington_s_disease_Main_Pathway - KEGG Adjusted 1.5	0.59588	0.595931
KEGG_Synthesis_and_degradation_of_ketone_bodies_Main_Pathway - KEGG Adjusted 1.5	0.640695	0.595795
reactome_Synthesis_of_PIPs_at_the_Golgi_membrane_Main_Pathway - Reactome 1.3	0.526831	0.595671
KEGG_Base_excision_repair_Main_Pathway - KEGG Adjusted 1.5	0.626668	0.59556
KEGG_Protein_processing_in_endoplasmic_reticulum_Main_Pathway - KEGG Adjusted 1.5	0.567639	0.595275
reactome_Signaling_by_ERBB2_Main_Pathway - Reactome 1.3	0.581658	0.593754
biocarta_insulin_signaling_Main_Pathway - Biocarta 1.2	0.602975	0.593741
biocarta_mechanisms_of_transcriptional_repression_by_dna_methylation_Main_Pathway - Biocarta 1.2	0.587583	0.593074
biocarta_mechanisms_of_transcriptional_repression_by_dna_methylation_Pathway_(histone_deacetylation) - Biocarta 1.2	0.587583	0.593074
reactome_Synthesis_of_very_long_chain_fatty_acyl_CoAs_Main_Pathway - Reactome 1.3	0.575554	0.592938
Ras_Pathway - Primary 1.4	0.602355	0.592344
KEGG_Aldosterone_regulated_sodium_reabsorption_Main_Pathway - KEGG Adjusted 1.5	0.596796	0.592022
biocarta_il_6_signaling_Main_Pathway - Biocarta 1.2	0.538703	0.591874
NCI_JNK_signaling_in_the_CD4_TCR_Main_Pathway - NCI 1.2	0.637988	0.591725
reactome_Synthesis_of_PIPs_at_the_early_endosome_membrane_Main_Pathway - Reactome 1.3	0.604881	0.590649
NCI_EPHA_forward_signaling_Pathway_(cell_cell_adhesion) - NCI 1.2	0.575907	0.590204
NCI_EPHA_forward_signaling_Pathway_(regulation_of_stress_fiber_assembly) - NCI 1.2	0.575907	0.590204
NCI_Signaling_events_mediated_by_Hepatocyte_Growth_Factor_Receptor_c_Met__Pathway_(positive_regulation_of_tyrosine_phosphorylation_of_STAT_protein) - NCI 1.2	0.646969	0.590056
NCI_ErbB2_ErbB3_signaling_events_Main_Pathway - NCI 1.2	0.62465	0.589511
reactome_Processing_of_Intronless_Pre_mRNAs_Main_Pathway - Reactome 1.3	0.620853	0.589239
KEGG_Linoleic_acid_metabolism_Main_Pathway - KEGG Adjusted 1.5	0.592006	0.58778
ATM_Pathway_Cell_Survival - Primary 1.4	0.471091	0.58726
reactome_RNA_Polymerase_III_Transcription_Initiation_From_Type_2_Promoter_Main_Pathway - Reactome 1.3	0.592619	0.584564
biocarta_regulation_of_ck1_cdk5_by_type_1_glutamate_receptors_Main_Pathway - Biocarta 1.2	0.596225	0.584242
KEGG_Basal_transcription_factors_Main_Pathway - KEGG Adjusted 1.5	0.619623	0.583636
NCI_ALK1_signaling_events_Main_Pathway - NCI 1.2	0.594014	0.583513
biocarta_lck_and_fyn_tyrosine_kinases_in_initiation_of_tcr_activation_Main_Pathway - Biocarta 1.2	0.577838	0.583414
NCI_ALK2_signaling_events_Main_Pathway - NCI 1.2	0.554565	0.583142
biocarta_mechanism_of_protein_import_into_the_nucleus_Main_Pathway - Biocarta 1.2	0.629177	0.582733
reactome_Activation_of_DNA_fragmentation_factor_Main_Pathway - Reactome 1.3	0.595829	0.582362
biocarta_how_does_salmonella_hijack_a_cell_Pathway_(lamellipodium_assembly) - Biocarta 1.2	0.498029	0.58047
Chemotaxis_Driven_by_IL-8_and_LTB4 - Cytoskeleton 1.2	0.554708	0.57932
NCI_N_cadherin_signaling_events_Main_Pathway - NCI 1.2	0.553513	0.579233
KEGG_Neurotrophin_signaling_Main_Pathway - KEGG Adjusted 1.5	0.584982	0.579221
NCI_Ephrin_B_reverse_signaling_Main_Pathway - NCI 1.2	0.625166	0.578912
D-imyoi-inositol-5-phosphate_metabolism - Metabolism 1.4	0.557445	0.578602
NCI_Signaling_events_mediated_by_the_Hedgehog_family_Pathway_(receptor_mediated_endocytosis) - NCI 1.2	0.601029	0.578516
NCI_Signaling_events_mediated_by_focal_adhesion_kinase_Pathway_(cell_migration) - NCI 1.2	0.557602	0.577267
reactome_DARPP_32_events_Main_Pathway - Reactome 1.3	0.581226	0.576772
Ras_Pathway_Apoptosis - Primary 1.4	0.582717	0.575102
NCI_LKB1_signaling_events_Pathway_(establishment_of_cell_polarity) - NCI 1.2	0.516517	0.573692
KEGG_alpha_Linolenic_acid_metabolism_Main_Pathway - KEGG Adjusted 1.5	0.561732	0.573581
reactome_RIG_I_MDA5_mediated_induction_of_IFN_alpha_beta_pathways_Main_Pathway - Reactome 1.3	0.633483	0.572913
biocarta_lissencephaly_gene_lis1_in_neuronal_migration_and_development_Main_Pathway - Biocarta 1.2	0.546199	0.572059
KEGG_Adipocytokine_signaling_Main_Pathway - KEGG Adjusted 1.5	0.549036	0.571515
KEGG_Collecting_duct_acid_secretion_Main_Pathway - KEGG Adjusted 1.5	0.5467	0.566729
NCI_Signaling_events_mediated_by_VEGFR1_and_VEGFR2_Pathway_(angiogenesis) - NCI 1.2	0.533157	0.566395
KEGG_Sphingolipid_metabolism_Main_Pathway - KEGG Adjusted 1.5	0.56965	0.566234
IGF1R_Signaling_Pathway_Apoptosis - Primary 1.4	0.619774	0.566172
NCI_Signaling_mediated_by_p38_alpha_and_p38_beta_Main_Pathway - NCI 1.2	0.557567	0.566135
KEGG_Pertussis_Main_Pathway - KEGG Adjusted 1.5	0.569939	0.565665
reactome_Ion_transport_by_P_type_ATPases_Main_Pathway - Reactome 1.3	0.635322	0.564527
reactome_RNA_Polymerase_III_Transcription_Initiation_From_Type_1_Promoter_Main_Pathway - Reactome 1.3	0.584003	0.562066
NCI_Sphingosine_1_phosphate_S1P_Main_Pathway - NCI 1.2	0.591795	0.561892
Akt_Signaling_Pathway_Blocks_Apoptosis - Primary 1.4	0.575596	0.561645
TGF-Beta_Pathway - Primary 1.4	0.602648	0.561051
NCI_Signaling_events_mediated_by_the_Hedgehog_family_Main_Pathway - NCI 1.2	0.579629	0.560124
NCI_Arf6_signaling_events_Main_Pathway - NCI 1.2	0.533266	0.558627
NCI_Signaling_events_mediated_by_focal_adhesion_kinase_Main_Pathway - NCI 1.2	0.551299	0.558095
NCI_Signaling_events_mediated_by_VEGFR1_and_VEGFR2_Pathway_(regulation_of_vascular_permeability) - NCI 1.2	0.532184	0.556871
NCI_Signaling_events_mediated_by_HDAC_Class_I_Main_Pathway - NCI 1.2	0.555955	0.556797
KEGG_Ubiquitin_mediated_proteolysis_Main_Pathway - KEGG Adjusted 1.5	0.574785	0.556549
reactome_EPHA_mediated_growth_cone_collapse_Main_Pathway - Reactome 1.3	0.565626	0.553643
HGF_Pathway_Anoikis - Primary 1.4	0.611605	0.553111
Ephrin-mediated_Signaling_Events_During_Cell_Adhesion - Cytoskeleton 1.2	0.557946	0.552641
NCI_Internalization_of_ErbB1_Main_Pathway - NCI 1.2	0.579079	0.552356
biocarta_integrin_signaling_Main_Pathway - Biocarta 1.2	0.542803	0.548584
RANK_Signaling_in_Osteoclasts_Pathway_Inhibition_of_Death - Primary 1.4	0.516241	0.548213
reactome_ERK_MAPK_targets_Main_Pathway - Reactome 1.3	0.566794	0.547594
HIF1Alpha_Pathway_p53_Hypoxia_Pathway - Primary 1.4	0.510057	0.546444
KEGG_PPAR_signaling_Main_Pathway - KEGG Adjusted 1.5	0.466347	0.546122
Akt_Signaling_Pathway_Acetylation_of_proteins - Primary 1.4	0.538563	0.544589
KEGG_Tight_junction_Main_Pathway - KEGG Adjusted 1.5	0.576584	0.54355
D-imyoi-inositol_145-trisphosphate_biosynthesis - Metabolism 1.4	0.523739	0.542758
Akt_Signaling_Pathway_Enhancement_of_Breast_Epithelial - Primary 1.4	0.606317	0.542622
ATM_Pathway - Primary 1.4	0.508415	0.539542
reactome_RNA_Polymerase_II_Pre_transcription_Events_Main_Pathway - Reactome 1.3	0.536672	0.538021
reactome_RNA_Polymerase_III_Transcription_Termination_Main_Pathway - Reactome 1.3	0.561097	0.537749
biocarta_rho_selective_guanine_exchange_factor_akap13_mediates_stress_fiber_formation_Main_Pathway - Biocarta 1.2	0.539258	0.536574
UTP_and_CTP_ide_novoi_biosynthesis - Metabolism 1.4	0.513414	0.536277
reactome_DNA_Damage_Telomere_Stress_Induced_Senescence_Main_Pathway - Reactome 1.3	0.549673	0.535844
reactome_Purine_catabolism_Main_Pathway - Reactome 1.3	0.512647	0.5353
NCI_Aurora_A_signaling_Pathway_(centrosome_duplication) - NCI 1.2	0.593373	0.53457
D-imyoi-inositol_134-trisphosphate_biosynthesis - Metabolism 1.4	0.560689	0.534125
Ras_Pathway_Golgi_Trafficking_and_Vesicle_Formation - Primary 1.4	0.563993	0.533729
L-kynurenine_degradation - Metabolism 1.4	0.552267	0.533395
reactome_temp_Post-translational_modification_synthesis_of_GPI-anchored_proteins - Reactome 1.3	0.460127	0.531973
reactome_Keratan_sulfate_biosynthesis_Main_Pathway - Reactome 1.3	0.619606	0.530686
NCI_Ephrin_B_reverse_signaling_Pathway_(cell_adhesion) - NCI 1.2	0.554897	0.530612
KEGG_Bladder_cancer_Main_Pathway - KEGG Adjusted 1.5	0.497538	0.529746
reactome_Dermatan_sulfate_biosynthesis_Main_Pathway - Reactome 1.3	0.503252	0.529685
reactome_Acetylcholine_regulates_insulin_secretion_Main_Pathway - Reactome 1.3	0.535989	0.529561
biocarta_multi_step_regulation_of_transcription_by_pitx2_Main_Pathway - Biocarta 1.2	0.573671	0.5271
KEGG_Glyoxylate_and_dicarboxylate_metabolism_Main_Pathway - KEGG Adjusted 1.5	0.501361	0.525603
reactome_Interleukin_1_signaling_Main_Pathway - Reactome 1.3	0.576183	0.525541
gamma-linolenate_biosynthesis - Metabolism 1.4	0.533401	0.524552
CMP_phosphorylation - Metabolism 1.4	0.533559	0.523822
Hedgehog_Signaling_in_Mammals_Pathway - Primary 1.4	0.551561	0.523575
Akt_Signaling_Pathway_Apoptosis - Primary 1.4	0.547235	0.522907
reactome_Activation_of_the_AP_1_family_of_transcription_factors_Main_Pathway - Reactome 1.3	0.563539	0.521126
reactome_RNA_Polymerase_II_Transcription_Elongation_Main_Pathway - Reactome 1.3	0.508702	0.520878
CXC_Chemokine_Receptor_Pathway - Cytoskeleton 1.2	0.49182	0.519988
NCI_ErbB1_downstream_signaling_Pathway_(cell_proliferation) - NCI 1.2	0.585865	0.519147
biocarta_role_of_erbb2_in_signal_transduction_and_oncology_Main_Pathway - Biocarta 1.2	0.537067	0.518281
reactome_repression_of_WNT_target_genes_Main_Pathway - Reactome 1.3	0.509513	0.512208
NCI_EPHA2_forward_signaling_Main_Pathway - NCI 1.2	0.533006	0.511441
reactome_Insulin_receptor_recycling_Main_Pathway - Reactome 1.3	0.430404	0.511429
KEGG_RNA_polymerase_Main_Pathway - KEGG Adjusted 1.5	0.519777	0.51133
KEGG_Glutamatergic_synapse_Main_Pathway - KEGG Adjusted 1.5	0.570169	0.511119
chondroitin_sulfate_biosynthesis - Metabolism 1.4	0.541108	0.508176
biocarta_the_co_stimulatory_signal_during_t_cell_activation_Pathway_(T_cell_activation) - Biocarta 1.2	0.618389	0.507471
reactome_p75NTR_recruits_signalling_complexes_Main_Pathway - Reactome 1.3	0.487576	0.504477
reactome_Synthesis_of_PA_Main_Pathway - Reactome 1.3	0.544342	0.502684
Akt_Signaling_Pathway_Increased_GLUT4_translocation - Primary 1.4	0.497627	0.501472
NCI_Arf1_Main_Pathway - NCI 1.2	0.451676	0.501311
reactome_Interferon_alpha_beta_signaling_Main_Pathway - Reactome 1.3	0.548169	0.498899
biocarta_lissencephaly_gene_lis1_in_neuronal_migration_and_development_Pathway_(retrograde_axon_cargo_transport) - Biocarta 1.2	0.435915	0.494113
NCI_EPHA_forward_signaling_Main_Pathway - NCI 1.2	0.525066	0.493284
biocarta_mcalpain_and_friends_in_cell_motility_Main_Pathway - Biocarta 1.2	0.51161	0.493098
TGF-Beta_Pathway_Transciption_Arrested_Growth_Apoptosis - Primary 1.4	0.602185	0.492381
TGF-Beta_Pathway_Transciption_Cell_Growth_and_Mobility_and_Angiogenesis - Primary 1.4	0.602185	0.492381
Akt_Signaling_Pathway_AR_mediated_apoptosis - Primary 1.4	0.509698	0.486988
Akt_Signaling_Pathway_Blood_cell_differentiation - Primary 1.4	0.509698	0.486988
Akt_Signaling_Pathway_Elevation_of_Glucose_Import - Primary 1.4	0.509698	0.486988
Akt_Signaling_Pathway_NF-kB_dependent_transciption - Primary 1.4	0.509698	0.486988
reactome_Downregulation_of_SMAD2_3_SMAD4_transcriptional_activity_Main_Pathway - Reactome 1.3	0.479381	0.486803
reactome_Sphingolipid_de_novo_biosynthesis_Main_Pathway - Reactome 1.3	0.480988	0.48423
reactome_Activated_NOTCH1_Transmits_Signal_to_the_Nucleus_Main_Pathway - Reactome 1.3	0.468625	0.483352
reactome_Dual_incision_reaction_in_GG_NER_Main_Pathway - Reactome 1.3	0.536654	0.481719
TRAF_Pathway_Gene_Expression_via_FOS_JUN - Primary 1.4	0.563766	0.480952
reactome_Activation_of_Rac_Main_Pathway - Reactome 1.3	0.457835	0.480841
NCI_BARD1_signaling_events_Main_Pathway - NCI 1.2	0.468156	0.48068
reactome_Synthesis_of_PC_Main_Pathway - Reactome 1.3	0.477487	0.480631
NCI_Signaling_mediated_by_p38_gamma_and_p38_delta_Main_Pathway - NCI 1.2	0.558387	0.48
NCI_Ephrin_B_reverse_signaling_Pathway_(angiogenesis) - NCI 1.2	0.509841	0.479035
NCI_Ephrin_B_reverse_signaling_Pathway_(endothelial_cell_migration) - NCI 1.2	0.509841	0.479035
reactome_Signaling_by_SCF_KIT_Main_Pathway - Reactome 1.3	0.482807	0.47786
NCI_ErbB1_downstream_signaling_Main_Pathway - NCI 1.2	0.561434	0.476772
KEGG_Melanoma_Main_Pathway - KEGG Adjusted 1.5	0.52567	0.476487
reactome_APC_C_Cdh1_mediated_degradation_of_Cdc20_and_other_APC_C_Cdh1_targeted_proteins_in_late_mitosis_early_G1_Main_Pathway - Reactome 1.3	0.475083	0.475696
KEGG_Pantothenate_and_CoA_biosynthesis_Main_Pathway - KEGG Adjusted 1.5	0.415774	0.475226
IL-10_Pathway_IL-10_Responsive_Genes_Transcription_of_BCLXL_Cyclin-D1_D2_D3_Pim1_c-Myc_and_P19(INK4D)_via_STAT3 - Primary 1.4	0.499079	0.474397
IL-10_Pathway_Inflammatory_Cytokine_Genes_Expression_via_STAT3 - Primary 1.4	0.499079	0.474397
NCI_Notch_signaling_Pathway_(Bergmann_glial_cell_differentiation) - NCI 1.2	0.494014	0.47368
3-phosphoinositide_biosynthesis - Metabolism 1.4	0.490541	0.473605
biocarta_repression_of_pain_sensation_by_the_transcriptional_regulator_dream_Main_Pathway - Biocarta 1.2	0.445127	0.473531
reactome_AKT_phosphorylates_targets_in_the_cytosol_Main_Pathway - Reactome 1.3	0.461876	0.47321
reactome_A_tetrasaccharide_linker_sequence_is_required_for_GAG_synthesis_Main_Pathway - Reactome 1.3	0.464948	0.473173
NCI_Signaling_events_mediated_by_Stem_cell_factor_receptor_c_Kit__Main_Pathway - NCI 1.2	0.483608	0.472096
HIF1Alpha_Pathway_NOS_Pathway - Primary 1.4	0.53836	0.471033
HIF1Alpha_Pathway_VEGF_Pathway - Primary 1.4	0.53836	0.471033
Akt_Signaling_Pathway_Cell_Cycle_Progression - Primary 1.4	0.484952	0.470872
reactome_IRAK1_recruits_IKK_complex_Main_Pathway - Reactome 1.3	0.532713	0.470118
reactome_IRAK1_recruits_IKK_complex_upon_TLR7_8_or_9_stimulation_Main_Pathway - Reactome 1.3	0.532713	0.470118
NCI_Signaling_events_mediated_by_VEGFR1_and_VEGFR2_Pathway_(cell_proliferation) - NCI 1.2	0.513384	0.469932
reactome_APC_C_Cdc20_mediated_degradation_of_Securin_Main_Pathway - Reactome 1.3	0.467515	0.469573
Angiotensin-PTK2B_Pathway - Cytoskeleton 1.2	0.491311	0.46846
CDC42_Pathway - Cytoskeleton 1.2	0.437428	0.468287
NCI_EPHA_forward_signaling_Pathway_(proteasomal_ubiquitin_dependent_protein_catabolic_process) - NCI 1.2	0.507602	0.467755
reactome_Prolactin_receptor_signaling_Main_Pathway - Reactome 1.3	0.533267	0.466073
TGF-Beta_Pathway_Epithelial_Mesenchymal_Transdifferentiation - Primary 1.4	0.479852	0.464181
biocarta_role_of_erk5_in_neuronal_survival_Pathway_(cell_survival) - Biocarta 1.2	0.448071	0.463488
IL-2_Pathway_Apoptosis_Inhibition - Primary 1.4	0.491509	0.458615
Akt_Signaling_Pathway_Glycogen_Synthesis_and_Apoptosis - Primary 1.4	0.471798	0.458343
reactome_Signaling_by_NODAL_Main_Pathway - Reactome 1.3	0.47902	0.456413
NCI_Signaling_events_mediated_by_focal_adhesion_kinase_Pathway_(negative_regulation_of_cell_adhesion_involved_in_substrate_bound_cell_migration) - NCI 1.2	0.415891	0.454409
KEGG_Folate_biosynthesis_Main_Pathway - KEGG Adjusted 1.5	0.479201	0.453222
reactome_Depolymerisation_of_the_Nuclear_Lamina_Main_Pathway - Reactome 1.3	0.473307	0.451119
TRAF_Pathway_Cell_Survival - Primary 1.4	0.502521	0.450686
NCI_E_cadherin_signaling_in_keratinocytes_Pathway_(keratinocyte_differentiation) - NCI 1.2	0.467845	0.448534
biocarta_il_7_signal_transduction_Main_Pathway - Biocarta 1.2	0.459878	0.44773
reactome_RNA_Pol_II_CTD_phosphorylation_and_interaction_with_CE_Main_Pathway - Reactome 1.3	0.430777	0.447508
NCI_CD40_CD40L_signaling_Main_Pathway - NCI 1.2	0.46012	0.446617
reactome_RNA_Polymerase_II_HIV_Promoter_Escape_Main_Pathway - Reactome 1.3	0.431948	0.445875
reactome_RNA_Polymerase_II_Promoter_Escape_Main_Pathway - Reactome 1.3	0.431948	0.445875
reactome_Hormone_sensitive_lipase_HSL_mediated_triacylglycerol_hydrolysis_Main_Pathway - Reactome 1.3	0.504052	0.444972
Chemotaxis_Driven_by_CCL2 - Cytoskeleton 1.2	0.440029	0.444366
Ubiquitin-Proteasome_Dependent_Proteolysis_Pathway - Primary 1.4	0.471082	0.442523
adenosine_deoxyribonucleotides_ide_novoi_biosynthesis - Metabolism 1.4	0.454962	0.440928
Akt_Signaling_Pathway_Genetic_Stability - Primary 1.4	0.461279	0.439246
biocarta_role_of_pi3k_subunit_p85_in_regulation_of_actin_organization_and_cell_migration_Main_Pathway - Biocarta 1.2	0.406784	0.4376
NCI_Notch_signaling_Main_Pathway - NCI 1.2	0.459099	0.437464
ICOS_signaling_in_T-helper_cells - Cytoskeleton 1.2	0.46164	0.437328
KEGG_Hepatitis_C_Main_Pathway - KEGG Adjusted 1.5	0.462407	0.437205
reactome_Deadenylation_of_mRNA_Main_Pathway - Reactome 1.3	0.50234	0.435597
HGF_Pathway_Cell_Scattering - Primary 1.4	0.457106	0.433741
HGF_Pathway_Cell_Survival - Primary 1.4	0.457106	0.433741
FAK_Pathway - Cytoskeleton 1.2	0.419981	0.431899
heparan_sulfate_biosynthesis_late_stages - Metabolism 1.4	0.443819	0.431676
HIF1Alpha_Pathway_Gene_Expression_via_JUN_CREB3 - Primary 1.4	0.412206	0.431342
Akt_Signaling_Pathway_Cell_Survival - Primary 1.4	0.430521	0.430674
KEGG_Wnt_signaling_Main_Pathway - KEGG Adjusted 1.5	0.418381	0.430192
reactome_Activation_of_Matrix_Metalloproteinases_Main_Pathway - Reactome 1.3	0.462248	0.429598
NCI_Notch_signaling_Pathway_(oligodendrocyte_development) - NCI 1.2	0.463186	0.429041
NCI_BARD1_signaling_events_Pathway_(DNA_repair) - NCI 1.2	0.441917	0.42825
IL-2_Pathway_Gene_Expression_via_FYN_LYN_RPS6KB1_PTK2B - Primary 1.4	0.400771	0.427495
reactome_Signaling_by_constitutively_active_EGFR_Main_Pathway - Reactome 1.3	0.535919	0.427483
KEGG_Fanconi_anemia_Main_Pathway - KEGG Adjusted 1.5	0.358658	0.426568
IGF1R_Signaling_Pathway_Protein_Synthesis - Primary 1.4	0.449586	0.425034
NCI_Nephrin_Neph1_signaling_in_the_kidney_podocyte_Main_Pathway - NCI 1.2	0.509531	0.424712
KEGG_Chronic_myeloid_leukemia_Main_Pathway - KEGG Adjusted 1.5	0.428344	0.424613
Akt_Signaling_Pathway_ERK_mediated_apoptosis - Primary 1.4	0.452227	0.424378
NCI_Alpha6_beta4_integrin_ligand_interactions_Main_Pathway - NCI 1.2	0.363106	0.422832
NCI_LPA_receptor_mediated_events_Pathway_(cAMP_biosynthetic_process) - NCI 1.2	0.458458	0.421187
reactome_Striated_Muscle_Contraction_Main_Pathway - Reactome 1.3	0.244594	0.418528
biocarta_influence_of_ras_and_rho_proteins_on_g1_to_s_transition_Main_Pathway - Biocarta 1.2	0.430076	0.418182
biocarta_melanocyte_development_and_pigmentation_Main_Pathway - Biocarta 1.2	0.427113	0.417897
dermatan_sulfate_biosynthesis - Metabolism 1.4	0.508742	0.41765
Chemotaxis_Driven_by_C5a - Cytoskeleton 1.2	0.402436	0.415918
Calcium2+_Signaling - Cytoskeleton 1.2	0.518135	0.415275
IGF1R_Signaling_Pathway_Cell_Survival - Primary 1.4	0.370979	0.414954
NCI_Neurotrophic_factor_mediated_Trk_receptor_signaling_Pathway_(MAPKKK_cascade) - NCI 1.2	0.470609	0.414879
HIF1Alpha_Pathway - Primary 1.4	0.382134	0.413741
Akt_Signaling_Pathway_NF-kB_pathway - Primary 1.4	0.394056	0.41222
NCI_Aurora_A_signaling_Pathway_(spindle_assembly) - NCI 1.2	0.449758	0.411156
biocarta_regulation_of_bad_phosphorylation_Main_Pathway - Biocarta 1.2	0.455991	0.4094
biocarta_role_of_mef2d_in_t_cell_apoptosis_Main_Pathway - Biocarta 1.2	0.432979	0.408448
KEGG_Propanoate_metabolism_Main_Pathway - KEGG Adjusted 1.5	0.410162	0.407879
heparan_sulfate_biosynthesis - Metabolism 1.4	0.45888	0.407755
FGFR_Signaling - Cytoskeleton 1.2	0.510995	0.40752
KEGG_Hedgehog_signaling_Main_Pathway - KEGG Adjusted 1.5	0.307573	0.397786
KEGG_Regulation_of_lipolysis_in_adipocytes_Main_Pathway - KEGG Adjusted 1.5	0.422293	0.397563
KEGG_Selenocompound_metabolism_Main_Pathway - KEGG Adjusted 1.5	0.368717	0.396994
biocarta_oxidative_stress_induced_gene_expression_via_nrf2_Main_Pathway - Biocarta 1.2	0.239644	0.395807
adenosine_ribonucleotides_ide_novoi_biosynthesis - Metabolism 1.4	0.390496	0.395745
NCI_Signaling_events_regulated_by_Ret_tyrosine_kinase_Main_Pathway - NCI 1.2	0.491579	0.394385
reactome_Abortive_elongation_of_HIV_1_transcript_in_the_absence_of_Tat_Main_Pathway - Reactome 1.3	0.395657	0.394014
IGF1R_Signaling_Pathway_Gene_Expression_Proliferation_Growth_Survival_via_NFAT5_CREB3 - Primary 1.4	0.577507	0.393568
NCI_E_cadherin_signaling_in_keratinocytes_Pathway_(apoptosis) - NCI 1.2	0.408004	0.393469
KEGG_Progesterone_mediated_oocyte_maturation_Main_Pathway - KEGG Adjusted 1.5	0.394257	0.391206
reactome_RNA_Polymerase_III_Transcription_Initiation_From_Type_3_Promoter_Main_Pathway - Reactome 1.3	0.411555	0.390204
reactome_RNA_Polymerase_III_Chain_Elongation_Main_Pathway - Reactome 1.3	0.40976	0.389672
reactome_Insulin_processing_Main_Pathway - Reactome 1.3	0.408441	0.389524
biocarta_keratinocyte_differentiation_Main_Pathway - Biocarta 1.2	0.382863	0.387297
SMAD_Signaling_Network_Pathway - Primary 1.4	0.375269	0.38585
KEGG_Phagosome_Main_Pathway - KEGG Adjusted 1.5	0.404995	0.385207
reactome_IRF3_mediated_induction_of_type_I_IFN_Main_Pathway - Reactome 1.3	0.411427	0.385071
Akt_Signaling_Pathway_Induction_of_Chromatin_Condensation - Primary 1.4	0.396582	0.382696
biocarta_stathmin_and_breast_cancer_resistance_to_antimicrotubule_agents_Main_Pathway - Biocarta 1.2	0.474169	0.382696
IGF1R_Signaling_Pathway_Cell_Proliferation_Diferentiation_and_Apoptosis - Primary 1.4	0.418389	0.380742
reactome_Activation_of_G_protein_gated_Potassium_channels_Main_Pathway - Reactome 1.3	0.376265	0.380693
reactome_Inhibition_of_voltage_gated_Ca2_channels_via_Gbeta_gamma_subunits_Main_Pathway - Reactome 1.3	0.376265	0.380693
reactome_Synthesis_secretion_and_deacylation_of_Ghrelin_Main_Pathway - Reactome 1.3	0.336191	0.378033
AHR_Pathway - Primary 1.4	0.384446	0.377267
reactome_temp_Nuclear_Receptor_transcription_pathway - Reactome 1.3	0.380416	0.375374
reactome_Downregulation_of_TGF_beta_receptor_signaling_Main_Pathway - Reactome 1.3	0.354659	0.375337
reactome_EGFR_downregulation_Main_Pathway - Reactome 1.3	0.449962	0.374842
NCI_AP_1_transcription_factor_network_Main_Pathway - NCI 1.2	0.327786	0.374409
KEGG_Protein_export_Main_Pathway - KEGG Adjusted 1.5	0.394674	0.37415
reactome_Dual_incision_reaction_in_TC_NER_Main_Pathway - Reactome 1.3	0.360649	0.37389
NCI_Signaling_events_regulated_by_Ret_tyrosine_kinase_Pathway_(lamellipodium_assembly) - NCI 1.2	0.401504	0.373828
reactome_ADP_signalling_through_P2Y_purinoceptor_12_Main_Pathway - Reactome 1.3	0.375977	0.372801
reactome_Activation_of_NF_kappaB_in_B_cells_Main_Pathway - Reactome 1.3	0.348347	0.370192
NCI_LPA_receptor_mediated_events_Main_Pathway - NCI 1.2	0.36446	0.367879
reactome_Signaling_by_BMP_Main_Pathway - Reactome 1.3	0.394013	0.363389
KEGG_Axon_guidance_Main_Pathway - KEGG Adjusted 1.5	0.368948	0.359221
NCI_ErbB2_ErbB3_signaling_events_Pathway_(myelination) - NCI 1.2	0.531197	0.354805
KEGG_Pathogenic_Escherichia_coli_infection_Main_Pathway - KEGG Adjusted 1.5	0.350425	0.352047
NCI_Signaling_events_mediated_by_Hepatocyte_Growth_Factor_Receptor_c_Met__Main_Pathway - NCI 1.2	0.399954	0.351453
NCI_E_cadherin_signaling_in_the_nascent_adherens_junction_Pathway_(regulation_of_actin_nucleation) - NCI 1.2	0.37762	0.340074
reactome_Presynaptic_function_of_Kainate_receptors_Main_Pathway - Reactome 1.3	0.344818	0.32684
KEGG_Acute_myeloid_leukemia_Main_Pathway - KEGG Adjusted 1.5	0.375726	0.3224
biocarta_keratinocyte_differentiation_Pathway_(apoptosis) - Biocarta 1.2	0.441156	0.322313
biocarta_hypoxia_inducible_factor_in_the_cardivascular_system_Main_Pathway - Biocarta 1.2	0.261877	0.321521
NCI_N_cadherin_signaling_events_Pathway_(actin_filament_polymerization) - NCI 1.2	0.353104	0.320903
NCI_N_cadherin_signaling_events_Pathway_(regulation_of_cell_cell_adhesion) - NCI 1.2	0.361075	0.320371
reactome_Prefoldin_mediated_transfer_of_substrate_to_CCT_TriC_Main_Pathway - Reactome 1.3	0.325015	0.319592
reactome_E2F_mediated_regulation_of_DNA_replication_Main_Pathway - Reactome 1.3	0.324094	0.317837
NCI_Nectin_adhesion_Main_Pathway - NCI 1.2	0.320077	0.314879
reactome_Post_chaperonin_tubulin_folding_Main_Pathway - Reactome 1.3	0.313278	0.311874
reactome_ECM_proteoglycans_Main_Pathway - Reactome 1.3	0.338818	0.311033
Ephrin-B_Pathway - Cytoskeleton 1.2	0.296771	0.306865
reactome_Downstream_signal_transduction_Main_Pathway - Reactome 1.3	0.285591	0.30632
Akt_Signaling_Pathway_Aggregation_and_Neurodegeneration - Primary 1.4	0.35753	0.303797
CDP-diacylglycerol_biosynthesis - Metabolism 1.4	0.25429	0.301608
KEGG_Endometrial_cancer_Main_Pathway - KEGG Adjusted 1.5	0.302464	0.297168
reactome_IRAK2_mediated_activation_of_TAK1_complex_Main_Pathway - Reactome 1.3	0.34652	0.294051
reactome_IRAK2_mediated_activation_of_TAK1_complex_upon_TLR7_8_or_9_stimulation_Main_Pathway - Reactome 1.3	0.34652	0.294051
biocarta_proteasome_complex_Pathway_(Pathway_degradation_of_PSMA1) - Biocarta 1.2	0.279967	0.289363
biocarta_inactivation_of_gsk3_by_akt_causes_accumulation_of_b_catenin_in_alveolar_macrophages_Main_Pathway - Biocarta 1.2	0.264895	0.287607
reactome_Synthesis_of_glycosylphosphatidylinositol_GPI__Main_Pathway - Reactome 1.3	0.272988	0.278615
KEGG_Taste_transduction_Main_Pathway - KEGG Adjusted 1.5	0.30587	0.27457
reactome_EPHB_mediated_forward_signaling_Main_Pathway - Reactome 1.3	0.274342	0.270563
KEGG_Transcriptional_misregulation_in_cancer_Main_Pathway - KEGG Adjusted 1.5	0.266073	0.269437
HGF_Pathway_Regulation_of_Cytoskeleton_Cell_Polarity_and_Cell_Motility - Primary 1.4	0.253327	0.263921
reactome_Synthesis_secretion_and_inactivation_of_Glucagon_like_Peptide_1_GLP_1__Main_Pathway - Reactome 1.3	0.227211	0.25906
NCI_E_cadherin_signaling_in_keratinocytes_Pathway_(adherens_junction_organization) - NCI 1.2	0.226953	0.257452
reactome_ADP_signalling_through_P2Y_purinoceptor_1_Main_Pathway - Reactome 1.3	0.292879	0.247372
Akt_Signaling_Pathway_NFAT_degradation - Primary 1.4	0.311294	0.246494
biocarta_map_kinase_inactivation_of_smrt_corepressor_Main_Pathway - Biocarta 1.2	0.422993	0.245504
NCI_Arf6_trafficking_events_Pathway_(calcium_ion_dependent_exocytosis) - NCI 1.2	0.22924	0.243723
NCI_E_cadherin_signaling_in_the_nascent_adherens_junction_Main_Pathway - NCI 1.2	0.254311	0.23838
KEGG_Circadian_rhythm_Main_Pathway - KEGG Adjusted 1.5	0.271929	0.229685
Hedgehog_Signaling_in_Mammals_no_Tubulin_Pathway - Primary 1.4	0.229697	0.222808
reactome_Prostacyclin_signalling_through_prostacyclin_receptor_Main_Pathway - Reactome 1.3	0.204354	0.221509
NCI_Arf6_trafficking_events_Pathway_(clathrin_coat_assembly) - NCI 1.2	0.206914	0.221224
reactome_Activation_of_IRF3_IRF7_mediated_by_TBK1_IKK_epsilon_Main_Pathway - Reactome 1.3	0.261733	0.212777
reactome_Intrinsic_Pathway_Main_Pathway - Reactome 1.3	0.159009	0.201422
biocarta_skeletal_muscle_hypertrophy_is_regulated_via_akt_mtor_Main_Pathway - Biocarta 1.2	0.274354	0.199876
reactome_ERKs_are_inactivated_Main_Pathway - Reactome 1.3	0.193783	0.192356
reactome_Synthesis_secretion_and_inactivation_of_Glucose_dependent_Insulinotropic_Polypeptide_GIP__Main_Pathway - Reactome 1.3	0.180911	0.186654
reactome_Pre_NOTCH_Processing_in_Golgi_Main_Pathway - Reactome 1.3	0.192547	0.180742
reactome_EPH_ephrin_mediated_repulsion_of_cells_Main_Pathway - Reactome 1.3	0.168256	0.168646
reactome_Degradation_of_beta_catenin_by_the_destruction_complex_Main_Pathway - Reactome 1.3	0.183954	0.1635
TCA_cycle - Metabolism 1.4	0.21224	0.157019
NCI_Signaling_events_mediated_by_PRL_Main_Pathway - NCI 1.2	0.0612197	0.105529
reactome_Activation_of_the_phototransduction_cascade_Main_Pathway - Reactome 1.3	0.0575665	0.081822
NCI_N_cadherin_signaling_events_Pathway_(myoblast_differentiation) - NCI 1.2	0.052876	0.0566481
KEGG_GABAergic_synapse_Main_Pathway - KEGG Adjusted 1.5	0.0568139	0.0223253
reactome_regulation_of_FZD_by_ubiquitination_Main_Pathway - Reactome 1.3	-0.0400263	-0.0530365
KEGG_Thyroid_hormone_synthesis_Main_Pathway - KEGG Adjusted 1.5	NA	NA

## Sheet: Hepatocellular_Carcinoma
Pathway	Pearson	Spearman
biocarta_the_co_stimulatory_signal_during_t_cell_activation_Pathway_(T_cell_activation) - Biocarta 1.2	0.177146	0.198675
reactome_Integrin_cell_surface_interactions_Main_Pathway - Reactome 1.3	0.153872	0.191436
Ras_Pathway_Apoptosis - Primary 1.4	0.164208	0.186308
IL-2_Pathway - Primary 1.4	0.151935	0.180155
VEGF_Pathway - Primary 1.4	0.164293	0.172793
NCI_Beta3_integrin_cell_surface_interactions_Main_Pathway - NCI 1.2	0.113431	0.162784
NCI_Beta1_integrin_cell_surface_interactions_Main_Pathway - NCI 1.2	0.130965	0.162199
reactome_Downstream_TCR_signaling_Main_Pathway - Reactome 1.3	0.129444	0.15691
biocarta_lck_and_fyn_tyrosine_kinases_in_initiation_of_tcr_activation_Main_Pathway - Biocarta 1.2	0.156219	0.154635
NCI_EPHA_forward_signaling_Pathway_(cell_cell_adhesion) - NCI 1.2	0.176706	0.154176
NCI_EPHA_forward_signaling_Pathway_(regulation_of_stress_fiber_assembly) - NCI 1.2	0.176706	0.154176
TRAF_Pathway_Direct_Antimicrobial_Response_and_Cell-Mediated_Immunity_and_Apoptosis_of_Host_Cell - Primary 1.4	0.168795	0.153898
RANK_Signaling_in_Osteoclasts_Pathway_Resorption - Primary 1.4	0.159288	0.151742
NCI_Signaling_events_mediated_by_VEGFR1_and_VEGFR2_Pathway_(focal_adhesion_assembly) - NCI 1.2	0.130855	0.149368
KEGG_VEGF_signaling_Main_Pathway - KEGG Adjusted 1.5	0.139593	0.146337
IGF1R_Signaling_Pathway_Cell_Migration - Primary 1.4	0.125794	0.143572
Extracellular_Matrix_Remodeling_during_Adhesion - Cytoskeleton 1.2	0.138751	0.143084
biocarta_internal_ribosome_entry_Main_Pathway - Biocarta 1.2	0.148485	0.139287
biocarta_internal_ribosome_entry_Pathway_(translational_initiation) - Biocarta 1.2	0.148485	0.139287
NCI_Beta2_integrin_cell_surface_interactions_Main_Pathway - NCI 1.2	0.0774046	0.134783
3-phosphoinositide_biosynthesis - Metabolism 1.4	0.130518	0.132403
KEGG_Hedgehog_signaling_Main_Pathway - KEGG Adjusted 1.5	0.106586	0.131404
NCI_Endogenous_TLR_signaling_Main_Pathway - NCI 1.2	0.0779218	0.130949
IGF1R_Signaling_Pathway - Primary 1.4	0.121464	0.128756
KEGG_Thyroid_hormone_synthesis_Main_Pathway - KEGG Adjusted 1.5	0.103563	0.122901
NCI_Integrins_in_angiogenesis_Main_Pathway - NCI 1.2	0.110592	0.121412
NCI_Ephrin_B_reverse_signaling_Pathway_(angiogenesis) - NCI 1.2	0.122598	0.120845
NCI_Ephrin_B_reverse_signaling_Pathway_(endothelial_cell_migration) - NCI 1.2	0.122598	0.120845
reactome_Integrin_alphaIIb_beta3_signaling_Main_Pathway - Reactome 1.3	0.0460303	0.120369
Ras_Pathway_Increased_T-cell_Adhesion - Primary 1.4	0.103026	0.11858
NCI_Atypical_NF_kappaB_Main_Pathway - NCI 1.2	0.119506	0.116885
KEGG_Thyroid_hormone_signaling_Main_Pathway - KEGG Adjusted 1.5	0.0980244	0.114651
KEGG_Fc_epsilon_RI_signaling_Main_Pathway - KEGG Adjusted 1.5	0.105325	0.113591
biocarta_role_of_mef2d_in_t_cell_apoptosis_Main_Pathway - Biocarta 1.2	0.122969	0.113369
HGF_Pathway_Cell_Adhesion_and_Cell_Migration - Primary 1.4	0.0961384	0.113042
reactome_RIP_mediated_NFkB_activation_via_ZBP1_Main_Pathway - Reactome 1.3	0.0616642	0.110161
NCI_Ephrin_B_reverse_signaling_Pathway_(cell_adhesion) - NCI 1.2	0.117628	0.109538
reactome_Signaling_by_SCF_KIT_Main_Pathway - Reactome 1.3	0.0932866	0.107942
reactome_Dermatan_sulfate_biosynthesis_Main_Pathway - Reactome 1.3	0.0920018	0.107019
KEGG_Glutamatergic_synapse_Main_Pathway - KEGG Adjusted 1.5	0.116934	0.10665
reactome_Insulin_processing_Main_Pathway - Reactome 1.3	0.106354	0.105844
biocarta_t_cell_receptor_signaling_Main_Pathway - Biocarta 1.2	0.0821002	0.104678
NCI_Alpha6_beta4_integrin_ligand_interactions_Main_Pathway - NCI 1.2	0.125633	0.103425
NCI_EPHA_forward_signaling_Main_Pathway - NCI 1.2	0.111523	0.102092
Akt_Signaling_Pathway - Primary 1.4	0.0969064	0.101949
Development_of_Immune_Synapse - Cytoskeleton 1.2	0.105618	0.101633
reactome_Degradation_of_the_extracellular_matrix_Main_Pathway - Reactome 1.3	0.108284	0.100794
NCI_Signaling_events_mediated_by_TCPTP_Pathway_(macrophage_differentiation) - NCI 1.2	0.0717683	0.10058
NCI_LPA_receptor_mediated_events_Main_Pathway - NCI 1.2	0.0763546	0.0970981
reactome_AKT_phosphorylates_targets_in_the_cytosol_Main_Pathway - Reactome 1.3	0.0604784	0.0951388
NCI_Signaling_events_mediated_by_the_Hedgehog_family_Main_Pathway - NCI 1.2	0.0761769	0.0919909
TRAF_Pathway_Cell_Survival - Primary 1.4	0.0805832	0.0904549
KEGG_Arginine_and_proline_metabolism_Main_Pathway - KEGG Adjusted 1.5	0.0820385	0.0893345
NCI_Signaling_events_mediated_by_Stem_cell_factor_receptor_c_Kit__Main_Pathway - NCI 1.2	0.0929276	0.0888625
NCI_Alpha_synuclein_signaling_Pathway_(Pathway_negative_regulation_of_transcription_via_TOR1A_SNCA_STUB1_FKBP1A) - NCI 1.2	0.0791612	0.0884782
NCI_Alpha_synuclein_signaling_Pathway_(Pathway_positive_regulation_of_gene_specific_transcription_via_TOR1A_SNCA_FKBP1A_STUB1) - NCI 1.2	0.0791612	0.0884782
reactome_IRAK1_recruits_IKK_complex_Main_Pathway - Reactome 1.3	0.088063	0.0873958
reactome_IRAK1_recruits_IKK_complex_upon_TLR7_8_or_9_stimulation_Main_Pathway - Reactome 1.3	0.088063	0.0873958
NCI_Ephrin_B_reverse_signaling_Main_Pathway - NCI 1.2	0.101558	0.0857213
NCI_Signaling_events_mediated_by_VEGFR1_and_VEGFR2_Main_Pathway - NCI 1.2	0.0862654	0.0854577
reactome_Deposition_of_new_CENPA_containing_nucleosomes_at_the_centromere_Main_Pathway - Reactome 1.3	0.0800517	0.0825058
KEGG_Huntington_s_disease_Main_Pathway - KEGG Adjusted 1.5	0.0954003	0.0809547
RANK_Signaling_in_Osteoclasts_Pathway_Inhibition_of_Death - Primary 1.4	0.075447	0.080938
NCI_Endogenous_TLR_signaling_Pathway_(regulation_of_apoptosis) - NCI 1.2	0.00594788	0.0796857
NCI_Endogenous_TLR_signaling_Pathway_(regulation_of_cell_proliferation) - NCI 1.2	0.00594788	0.0796857
NCI_Endogenous_TLR_signaling_Pathway_(regulation_of_interleukin_1_beta_production) - NCI 1.2	0.00594788	0.0796857
KEGG_Morphine_addiction_Main_Pathway - KEGG Adjusted 1.5	0.0869807	0.0795087
KEGG_Histidine_metabolism_Main_Pathway - KEGG Adjusted 1.5	0.0766714	0.0786474
SMAD_Signaling_Network_Pathway - Primary 1.4	0.0726127	0.0782173
IGF1R_Signaling_Pathway_Cell_Proliferation_Diferentiation_and_Apoptosis - Primary 1.4	0.0663773	0.0774348
TGF-Beta_Pathway - Primary 1.4	0.03566	0.0769718
reactome_Interaction_With_The_Zona_Pellucida_Main_Pathway - Reactome 1.3	0.01569	0.0766257
NCI_ALK1_signaling_events_Pathway_(endothelial_cell_proliferation) - NCI 1.2	0.0139401	0.0764792
reactome_DNA_Damage_Telomere_Stress_Induced_Senescence_Main_Pathway - Reactome 1.3	0.0835976	0.0760848
KEGG_Bacterial_invasion_of_epithelial_cells_Main_Pathway - KEGG Adjusted 1.5	0.0824083	0.0758542
NCI_EPHA_forward_signaling_Pathway_(proteasomal_ubiquitin_dependent_protein_catabolic_process) - NCI 1.2	0.088911	0.0750091
NCI_Alpha_synuclein_signaling_Pathway_(neuron_apoptosis) - NCI 1.2	0.0679104	0.0748298
KEGG_Acute_myeloid_leukemia_Main_Pathway - KEGG Adjusted 1.5	0.0658139	0.0746366
NCI_Nongenotropic_Androgen_signaling_Main_Pathway - NCI 1.2	0.0741283	0.0740026
gamma-linolenate_biosynthesis - Metabolism 1.4	0.122479	0.0735379
Cytoskeleton_Reorganization - Cytoskeleton 1.2	0.0739358	0.0733368
FCGR3A-mediated_phagocytosis - Cytoskeleton 1.2	0.0895301	0.0730375
reactome_Activation_of_PPARGC1A_PGC_1alpha_by_phosphorylation_Main_Pathway - Reactome 1.3	0.0653355	0.0726331
NCI_Netrin_mediated_signaling_events_Main_Pathway - NCI 1.2	0.0816346	0.0719321
biocarta_induction_of_apoptosis_through_dr3_and_dr4_5_death_receptors_Pathway_(Pathway_degradation_of_CASP3_CASP10_CASP10) - Biocarta 1.2	0.059191	0.071902
IL-10_Pathway - Primary 1.4	0.100702	0.0704498
reactome_temp_Immunoregulatory_interactions_between_a_Lymphoid_and_a_non-Lymphoid_cell - Reactome 1.3	0.092056	0.0696918
HMGB1_signaling_through_RAGE - Cytoskeleton 1.2	0.087517	0.0688317
KEGG_Axon_guidance_Main_Pathway - KEGG Adjusted 1.5	0.0819992	0.0683256
biocarta_proteasome_complex_Pathway_(Pathway_degradation_of_PSMA1) - Biocarta 1.2	0.0714313	0.0680989
IL-2_Pathway_Apoptosis_Inhibition - Primary 1.4	0.037508	0.0677135
reactome_Interleukin_receptor_SHC_signaling_Main_Pathway - Reactome 1.3	0.0474221	0.067389
NCI_Beta5_beta6_beta7_and_beta8_integrin_cell_surface_interactions_Main_Pathway - NCI 1.2	0.0205381	0.0670617
NCI_Nongenotropic_Androgen_signaling_Pathway_(apoptosis) - NCI 1.2	0.0832396	0.0670594
NCI_Nongenotropic_Androgen_signaling_Pathway_(cell_proliferation) - NCI 1.2	0.0607223	0.0662004
NCI_Signaling_events_mediated_by_VEGFR1_and_VEGFR2_Pathway_(angiogenesis) - NCI 1.2	0.084805	0.0657748
TRAF_Pathway - Primary 1.4	0.0688142	0.0655558
CDK5_Signaling_in_Neurons - Cytoskeleton 1.2	0.047416	0.0648728
KEGG_Ras_signaling_Main_Pathway - KEGG Adjusted 1.5	0.0681968	0.0643919
biocarta_induction_of_apoptosis_through_dr3_and_dr4_5_death_receptors_Pathway_(apoptosis) - Biocarta 1.2	0.0303658	0.0641846
KEGG_Folate_biosynthesis_Main_Pathway - KEGG Adjusted 1.5	0.0759099	0.063463
KEGG_Leukocyte_transendothelial_migration_Main_Pathway - KEGG Adjusted 1.5	0.0975305	0.0626481
reactome_Platelet_sensitization_by_LDL_Main_Pathway - Reactome 1.3	0.0606116	0.0625135
reactome_Initial_triggering_of_complement_Main_Pathway - Reactome 1.3	0.0706854	0.0622856
KEGG_Endocytosis_Main_Pathway - KEGG Adjusted 1.5	0.0817895	0.062094
KEGG_Osteoclast_differentiation_Main_Pathway - KEGG Adjusted 1.5	0.105718	0.0617913
NCI_CD40_CD40L_signaling_Main_Pathway - NCI 1.2	0.0455483	0.0613596
KEGG_Progesterone_mediated_oocyte_maturation_Main_Pathway - KEGG Adjusted 1.5	0.0118385	0.0598616
reactome_IRF3_mediated_induction_of_type_I_IFN_Main_Pathway - Reactome 1.3	0.0444188	0.0594778
glutathione-mediated_detoxification - Metabolism 1.4	0.0422736	0.0584814
STAT3_Pathway - Primary 1.4	0.0792255	0.0584524
Tumour_Infiltration_Pathway - Primary 1.4	0.0900715	0.0584194
Chemotaxis_Driven_by_CCR4 - Cytoskeleton 1.2	0.0567816	0.0577609
Chemotaxis_of_Immune_Cells_During_Allergic_Asthma_and_Eczema_Driven_by_CCR4 - Cytoskeleton 1.2	0.0567816	0.0577609
D-imyoi-inositol_134-trisphosphate_biosynthesis - Metabolism 1.4	0.0383386	0.0566131
NCI_Signaling_events_mediated_by_VEGFR1_and_VEGFR2_Pathway_(regulation_of_vascular_permeability) - NCI 1.2	0.0759783	0.0561467
NCI_EPHA_forward_signaling_Pathway_(axon_guidance) - NCI 1.2	0.0795648	0.0558239
TRAF_Pathway_Gene_Expression_via_FOS_JUN - Primary 1.4	0.0673346	0.0556345
KEGG_Propanoate_metabolism_Main_Pathway - KEGG Adjusted 1.5	0.0426142	0.0554703
reactome_Interleukin_2_signaling_Main_Pathway - Reactome 1.3	0.0461735	0.0547264
TNF_Signaling_Pathway_Apoptosis - Primary 1.4	0.0375628	0.0540734
KEGG_Wnt_signaling_Main_Pathway - KEGG Adjusted 1.5	0.0212176	0.0539774
NCI_Signaling_events_mediated_by_the_Hedgehog_family_Pathway_(receptor_mediated_endocytosis) - NCI 1.2	0.0276647	0.0539511
reactome_Interleukin_1_signaling_Main_Pathway - Reactome 1.3	0.0274366	0.0521828
reactome_A_tetrasaccharide_linker_sequence_is_required_for_GAG_synthesis_Main_Pathway - Reactome 1.3	0.0349865	0.0520772
KEGG_Type_I_diabetes_mellitus_Main_Pathway - KEGG Adjusted 1.5	0.0874705	0.051951
IL-10_Pathway_IL-10_Responsive_Genes_Transcription_of_BCLXL_Cyclin-D1_D2_D3_Pim1_c-Myc_and_P19(INK4D)_via_STAT3 - Primary 1.4	0.0468827	0.0519102
IL-10_Pathway_Inflammatory_Cytokine_Genes_Expression_via_STAT3 - Primary 1.4	0.0468827	0.0519102
NCI_Signaling_events_mediated_by_PRL_Main_Pathway - NCI 1.2	0.0509236	0.0516494
ATM_Pathway_Cell_Survival - Primary 1.4	0.016534	0.05051
Akt_Signaling_Pathway_NF-kB_pathway - Primary 1.4	0.0264271	0.0497068
KEGG_Pancreatic_cancer_Main_Pathway - KEGG Adjusted 1.5	0.0471434	0.0490354
TGF-Beta_Pathway_Epithelial_Mesenchymal_Transdifferentiation - Primary 1.4	0.0332643	0.0490192
reactome_ECM_proteoglycans_Main_Pathway - Reactome 1.3	0.0625813	0.047648
Ras_Pathway - Primary 1.4	0.039831	0.0464678
KEGG_Chronic_myeloid_leukemia_Main_Pathway - KEGG Adjusted 1.5	0.0384538	0.0464572
reactome_Downregulation_of_TGF_beta_receptor_signaling_Main_Pathway - Reactome 1.3	0.0209363	0.0464421
KEGG_Salivary_secretion_Main_Pathway - KEGG Adjusted 1.5	0.00342282	0.0461472
KEGG_Pathogenic_Escherichia_coli_infection_Main_Pathway - KEGG Adjusted 1.5	0.0393749	0.0455205
KEGG_Gap_junction_Main_Pathway - KEGG Adjusted 1.5	-0.00416624	0.0454898
KEGG_Glycosaminoglycan_biosynthesis_keratan_sulfate_Main_Pathway - KEGG Adjusted 1.5	0.0192954	0.0452061
reactome_Signaling_by_BMP_Main_Pathway - Reactome 1.3	-0.0229929	0.045024
reactome_Synthesis_of_PIPs_at_the_Golgi_membrane_Main_Pathway - Reactome 1.3	0.0665638	0.0447755
Akt_Signaling_Pathway_ERK_mediated_apoptosis - Primary 1.4	0.0205807	0.0440667
NCI_Signaling_events_mediated_by_focal_adhesion_kinase_Pathway_(cell_migration) - NCI 1.2	0.0553662	0.0438366
NCI_Aurora_B_signaling_Main_Pathway - NCI 1.2	0.0107716	0.0423955
CMP_phosphorylation - Metabolism 1.4	0.0611836	0.0423458
IGF1R_Signaling_Pathway_Cell_Survival - Primary 1.4	-0.00244324	0.0419196
KEGG_Selenocompound_metabolism_Main_Pathway - KEGG Adjusted 1.5	0.0154188	0.0413862
NCI_Aurora_A_signaling_Pathway_(protein_catabolic_process) - NCI 1.2	0.0544962	0.0413494
KEGG_Dilated_cardiomyopathy_Main_Pathway - KEGG Adjusted 1.5	0.00547884	0.0412421
KEGG_Hypertrophic_cardiomyopathy_HCM__Main_Pathway - KEGG Adjusted 1.5	0.00547884	0.0412421
FN1_Influence_on_Cell_Motility_via_Integrins - Cytoskeleton 1.2	0.0472206	0.0408568
biocarta_inactivation_of_gsk3_by_akt_causes_accumulation_of_b_catenin_in_alveolar_macrophages_Main_Pathway - Biocarta 1.2	0.0119167	0.0390895
reactome_EPH_ephrin_mediated_repulsion_of_cells_Main_Pathway - Reactome 1.3	0.0323464	0.038956
Akt_Signaling_Pathway_NFAT_degradation - Primary 1.4	0.0539772	0.0388924
D-imyoi-inositol_145-trisphosphate_degradation - Metabolism 1.4	0.0721288	0.0386332
KEGG_Pertussis_Main_Pathway - KEGG Adjusted 1.5	0.0450246	0.0378205
reactome_Degradation_of_beta_catenin_by_the_destruction_complex_Main_Pathway - Reactome 1.3	0.0265571	0.0367984
NCI_JNK_signaling_in_the_CD4_TCR_Main_Pathway - NCI 1.2	0.0519277	0.0367398
biocarta_role_of_pi3k_subunit_p85_in_regulation_of_actin_organization_and_cell_migration_Main_Pathway - Biocarta 1.2	0.0424449	0.036685
KEGG_Legionellosis_Main_Pathway - KEGG Adjusted 1.5	0.0549939	0.0349821
KEGG_Peroxisome_Main_Pathway - KEGG Adjusted 1.5	0.0718471	0.0348821
reactome_DCC_mediated_attractive_signaling_Main_Pathway - Reactome 1.3	0.0417564	0.0347
reactome_ERK_MAPK_targets_Main_Pathway - Reactome 1.3	-0.00471884	0.034218
reactome_Activation_of_NF_kappaB_in_B_cells_Main_Pathway - Reactome 1.3	0.0237654	0.0339052
NCI_Signaling_events_mediated_by_TCPTP_Main_Pathway - NCI 1.2	0.0459401	0.0332528
KEGG_Phagosome_Main_Pathway - KEGG Adjusted 1.5	0.0324082	0.0332154
NCI_ALK2_signaling_events_Main_Pathway - NCI 1.2	-0.0178378	0.0330931
KEGG_Colorectal_cancer_Main_Pathway - KEGG Adjusted 1.5	-0.00665027	0.0327524
reactome_Downstream_signal_transduction_Main_Pathway - Reactome 1.3	0.0144674	0.032362
reactome_RMTs_methylate_histone_arginines_Main_Pathway - Reactome 1.3	0.00678904	0.0315722
reactome_Signaling_by_NODAL_Main_Pathway - Reactome 1.3	0.00676818	0.0313086
TNF_Signaling_Pathway - Primary 1.4	0.0635137	0.0301412
NCI_Signaling_events_mediated_by_Hepatocyte_Growth_Factor_Receptor_c_Met__Pathway_(positive_regulation_of_tyrosine_phosphorylation_of_STAT_protein) - NCI 1.2	0.0438672	0.0298206
reactome_Activation_of_the_phototransduction_cascade_Main_Pathway - Reactome 1.3	0.0147653	0.0296698
KEGG_Retinol_metabolism_Main_Pathway - KEGG Adjusted 1.5	0.0356072	0.0294224
adenosine_ribonucleotides_ide_novoi_biosynthesis - Metabolism 1.4	0.0658129	0.0293347
biocarta_how_does_salmonella_hijack_a_cell_Pathway_(lamellipodium_assembly) - Biocarta 1.2	0.0450059	0.0291867
reactome_Synthesis_of_PIPs_at_the_plasma_membrane_Main_Pathway - Reactome 1.3	0.0379537	0.0283773
reactome_Synthesis_of_very_long_chain_fatty_acyl_CoAs_Main_Pathway - Reactome 1.3	0.0913035	0.0281936
NCI_ErbB1_downstream_signaling_Pathway_(ruffle_organization) - NCI 1.2	0.0697902	0.0278674
NCI_Neurotrophic_factor_mediated_Trk_receptor_signaling_Main_Pathway - NCI 1.2	0.0370766	0.0276535
Akt_Signaling_Pathway_Aggregation_and_Neurodegeneration - Primary 1.4	0.016922	0.0274636
KEGG_Lysosome_Main_Pathway - KEGG Adjusted 1.5	-0.0363965	0.0268894
NCI_Signaling_events_mediated_by_focal_adhesion_kinase_Main_Pathway - NCI 1.2	0.0545254	0.0268319
reactome_ABCA_transporters_in_lipid_homeostasis_Main_Pathway - Reactome 1.3	0.0544759	0.0265604
KEGG_Glyoxylate_and_dicarboxylate_metabolism_Main_Pathway - KEGG Adjusted 1.5	0.072337	0.0263761
TRAF_Pathway_Apoptosis - Primary 1.4	0.0701164	0.0258003
TNF_Signaling_Pathway_Gene_Expression_and_Cell_Survival_via_FOS_NFKB2_JUN_ELK1_ATF6 - Primary 1.4	0.051009	0.0253339
CD16_Pathway_in_Natural_Killer_cells - Cytoskeleton 1.2	0.038398	0.0251669
chondroitin_sulfate_biosynthesis_late_stages - Metabolism 1.4	0.0108304	0.0249878
biocarta_induction_of_apoptosis_through_dr3_and_dr4_5_death_receptors_Main_Pathway - Biocarta 1.2	0.0128831	0.0249004
Akt_Signaling_Pathway_Glycogen_Synthesis_and_Apoptosis - Primary 1.4	-0.0206501	0.0248753
reactome_Post_chaperonin_tubulin_folding_Main_Pathway - Reactome 1.3	0.022862	0.0242944
NCI_Nephrin_Neph1_signaling_in_the_kidney_podocyte_Main_Pathway - NCI 1.2	0.0455763	0.0241676
reactome_Signaling_by_Hippo_Main_Pathway - Reactome 1.3	0.0262873	0.0236979
biocarta_mcalpain_and_friends_in_cell_motility_Main_Pathway - Biocarta 1.2	0.0398379	0.0230428
reactome_Synthesis_of_PIPs_at_the_early_endosome_membrane_Main_Pathway - Reactome 1.3	0.0690356	0.0228607
guanosine_nucleotides_ide_novoi_biosynthesis - Metabolism 1.4	0.0209819	0.0223764
NCI_Endothelins_Pathway_(cAMP_biosynthetic_process) - NCI 1.2	0.050271	0.022263
biocarta_melanocyte_development_and_pigmentation_Main_Pathway - Biocarta 1.2	-0.0212057	0.0211599
KEGG_Complement_and_coagulation_cascades_Main_Pathway - KEGG Adjusted 1.5	0.0100351	0.0206813
CXC_Chemokine_Receptor_Pathway - Cytoskeleton 1.2	0.0301518	0.0205578
UTP_and_CTP_ide_novoi_biosynthesis - Metabolism 1.4	0.0096309	0.0203942
biocarta_il_7_signal_transduction_Main_Pathway - Biocarta 1.2	0.0234615	0.0203422
Ephrin-mediated_Signaling_Events_During_Cell_Adhesion - Cytoskeleton 1.2	0.0380029	0.020044
biocarta_il_4_signaling_Main_Pathway - Biocarta 1.2	-0.00848714	0.0189894
NCI_Notch_signaling_Pathway_(Bergmann_glial_cell_differentiation) - NCI 1.2	-0.00648224	0.0183058
reactome_RIG_I_MDA5_mediated_induction_of_IFN_alpha_beta_pathways_Main_Pathway - Reactome 1.3	-0.0402415	0.017888
reactome_APC_C_Cdc20_mediated_degradation_of_Securin_Main_Pathway - Reactome 1.3	0.018841	0.0173345
reactome_APC_C_Cdh1_mediated_degradation_of_Cdc20_and_other_APC_C_Cdh1_targeted_proteins_in_late_mitosis_early_G1_Main_Pathway - Reactome 1.3	0.018841	0.0173345
FAK_Pathway - Cytoskeleton 1.2	-0.00970498	0.0170954
KEGG_Renin_angiotensin_system_Main_Pathway - KEGG Adjusted 1.5	0.0593724	0.0169229
Ephrin-B_Pathway - Cytoskeleton 1.2	0.0377182	0.0162677
Akt_Signaling_Pathway_Enhancement_of_Breast_Epithelial - Primary 1.4	-0.017755	0.0153936
CCR3_Pathway_in_Eosinophils - Cytoskeleton 1.2	0.0227425	0.0153567
NCI_Arf1_Main_Pathway - NCI 1.2	0.0363251	0.0150534
KEGG_Glycosphingolipid_biosynthesis_ganglio_series_Main_Pathway - KEGG Adjusted 1.5	-0.00265895	0.0148183
Chemotaxis_Driven_by_CCL2 - Cytoskeleton 1.2	0.00785514	0.0147931
biocarta_influence_of_ras_and_rho_proteins_on_g1_to_s_transition_Main_Pathway - Biocarta 1.2	0.0418211	0.0147742
Akt_Signaling_Pathway_Cell_Survival - Primary 1.4	0.00409766	0.014315
NCI_Lissencephaly_gene_LIS1_in_neuronal_migration_and_development_Main_Pathway - NCI 1.2	0.0348956	0.0142123
NCI_Notch_signaling_Pathway_(oligodendrocyte_development) - NCI 1.2	-0.00788336	0.0142095
KEGG_Tyrosine_metabolism_Main_Pathway - KEGG Adjusted 1.5	0.0312917	0.0130522
reactome_Activation_of_Rac_Main_Pathway - Reactome 1.3	-0.0491746	0.0126076
biocarta_role_of_erk5_in_neuronal_survival_Pathway_(cell_survival) - Biocarta 1.2	-0.00475614	0.011901
NCI_EPO_signaling_Main_Pathway - NCI 1.2	0.035171	0.011772
reactome_EPHB_mediated_forward_signaling_Main_Pathway - Reactome 1.3	-0.0217339	0.0109532
biocarta_nfkb_activation_by_nontypeable_hemophilus_influenzae_Main_Pathway - Biocarta 1.2	0.0143981	0.0108661
Ubiquitin-Proteasome_Dependent_Proteolysis_Pathway - Primary 1.4	0.0040635	0.0106522
Akt_Signaling_Pathway_Induction_of_Chromatin_Condensation - Primary 1.4	-0.0134733	0.01024
NCI_LKB1_signaling_events_Pathway_(Pathway_positive_regulation_of_CREB_transcription_factor_activity_via_CRTC2) - NCI 1.2	0.00518043	0.00990259
reactome_Inhibition_of_replication_initiation_of_damaged_DNA_by_RB1_E2F1_Main_Pathway - Reactome 1.3	0.00908847	0.00978586
NCI_Endothelins_Main_Pathway - NCI 1.2	0.00699039	0.00950771
KEGG_Melanoma_Main_Pathway - KEGG Adjusted 1.5	-0.0378095	0.00926754
NCI_ErbB1_downstream_signaling_Main_Pathway - NCI 1.2	0.0302521	0.00926642
KEGG_Hepatitis_C_Main_Pathway - KEGG Adjusted 1.5	-0.0659289	0.00853641
D-imyoi-inositol-5-phosphate_metabolism - Metabolism 1.4	-0.0283558	0.00853474
HGF_Pathway_Anoikis - Primary 1.4	-0.00161879	0.00768464
TCA_cycle - Metabolism 1.4	-0.0114891	0.0076623
NCI_ALK1_signaling_events_Main_Pathway - NCI 1.2	-0.0111944	0.00750591
NCI_LPA_receptor_mediated_events_Pathway_(cAMP_biosynthetic_process) - NCI 1.2	0.028391	0.00734282
KEGG_Transcriptional_misregulation_in_cancer_Main_Pathway - KEGG Adjusted 1.5	-0.017709	0.00628159
NCI_Neurotrophic_factor_mediated_Trk_receptor_signaling_Pathway_(Schwann_cell_development) - NCI 1.2	0.0180557	0.00575098
AHR_Pathway_C-myc_expression_via_RELA - Primary 1.4	0.0334921	0.005546
reactome_Activation_of_gene_expression_by_SREBF_SREBP__Main_Pathway - Reactome 1.3	0.0119565	0.00500701
D-imyoi-inositol_145-trisphosphate_biosynthesis - Metabolism 1.4	-0.0500928	0.00496959
reactome_Prolactin_receptor_signaling_Main_Pathway - Reactome 1.3	0.0111271	0.004964
KEGG_Endometrial_cancer_Main_Pathway - KEGG Adjusted 1.5	-0.0160156	0.00476572
biocarta_hypoxia_inducible_factor_in_the_cardivascular_system_Main_Pathway - Biocarta 1.2	0.0446811	0.00400053
NCI_Signaling_events_mediated_by_Hepatocyte_Growth_Factor_Receptor_c_Met__Main_Pathway - NCI 1.2	0.0359958	0.00398824
ATM_Pathway_G2-Mitosis_progression - Primary 1.4	0.0076191	0.00385586
ATM_Pathway_G2_M_Checkpoint_Arrest - Primary 1.4	0.0076191	0.00385586
AHR_Pathway_PS2_Gene_expression_via_ESR1 - Primary 1.4	0.0260195	0.00380783
reactome_Hormone_sensitive_lipase_HSL_mediated_triacylglycerol_hydrolysis_Main_Pathway - Reactome 1.3	-0.0278242	0.00352186
Chemokine_Ligand_2_Signaling - Cytoskeleton 1.2	0.0149833	0.00300912
reactome_Acetylcholine_Neurotransmitter_Release_Cycle_Main_Pathway - Reactome 1.3	0.0967744	0.00238747
reactome_Dopamine_Neurotransmitter_Release_Cycle_Main_Pathway - Reactome 1.3	0.0967744	0.00238747
NCI_Signaling_events_mediated_by_TCPTP_Pathway_(regulation_of_gluconeogenesis) - NCI 1.2	0.00176632	0.00197359
1D-imyoi-inositol_hexakisphosphate_biosynthesis_II_mammalian - Metabolism 1.4	0.0235585	0.000883327
reactome_Abortive_elongation_of_HIV_1_transcript_in_the_absence_of_Tat_Main_Pathway - Reactome 1.3	0.0116064	0.000681695
NCI_Arf6_trafficking_events_Pathway_(cell_adhesion_mediated_by_integrin) - NCI 1.2	-0.00162329	-0.00089394
reactome_Interferon_alpha_beta_signaling_Main_Pathway - Reactome 1.3	0.0235905	-0.00122068
STAT3_Pathway_Growth_Arrest_and_Differentiation - Primary 1.4	0.0473853	-0.00204676
NCI_Internalization_of_ErbB1_Main_Pathway - NCI 1.2	-0.0417373	-0.00231039
FGFR_Signaling - Cytoskeleton 1.2	0.0347413	-0.00313982
AHR_Pathway - Primary 1.4	0.00912857	-0.00319958
reactome_p75NTR_recruits_signalling_complexes_Main_Pathway - Reactome 1.3	0.0215822	-0.00324706
biocarta_skeletal_muscle_hypertrophy_is_regulated_via_akt_mtor_Main_Pathway - Biocarta 1.2	-0.00617522	-0.00327163
Chemotaxis_Driven_by_C5a - Cytoskeleton 1.2	-0.0104301	-0.00334704
biocarta_integrin_signaling_Main_Pathway - Biocarta 1.2	-0.00640304	-0.0038419
reactome_E2F_enabled_inhibition_of_pre_replication_complex_formation_Main_Pathway - Reactome 1.3	-0.0786268	-0.00407258
NCI_N_cadherin_signaling_events_Main_Pathway - NCI 1.2	-0.0245765	-0.00483442
reactome_Ion_transport_by_P_type_ATPases_Main_Pathway - Reactome 1.3	0.0165165	-0.00503326
CDP-diacylglycerol_biosynthesis - Metabolism 1.4	-0.00447457	-0.00559906
KEGG_Insulin_secretion_Main_Pathway - KEGG Adjusted 1.5	-0.0127064	-0.00721268
ICOS_signaling_in_T-helper_cells - Cytoskeleton 1.2	0.000390397	-0.00721938
HGF_Pathway_Cell_Scattering - Primary 1.4	-0.022274	-0.00847162
HGF_Pathway_Cell_Survival - Primary 1.4	-0.022274	-0.00847162
reactome_Synthesis_of_bile_acids_and_bile_salts_via_7alpha_hydroxycholesterol_Main_Pathway - Reactome 1.3	0.0100114	-0.00858891
reactome_DSCAM_interactions_Main_Pathway - Reactome 1.3	-0.00898856	-0.00873748
Gamma-Aminobutyric_Acid_A_Receptor_Pathway - Cytoskeleton 1.2	-0.0265077	-0.00874977
Akt_Signaling_Pathway_AR_mediated_apoptosis - Primary 1.4	-0.014445	-0.00884584
Akt_Signaling_Pathway_Blood_cell_differentiation - Primary 1.4	-0.014445	-0.00884584
Akt_Signaling_Pathway_Elevation_of_Glucose_Import - Primary 1.4	-0.014445	-0.00884584
Akt_Signaling_Pathway_Genetic_Stability - Primary 1.4	-0.014445	-0.00884584
Akt_Signaling_Pathway_NF-kB_dependent_transciption - Primary 1.4	-0.014445	-0.00884584
Akt_Signaling_Pathway_Apoptosis - Primary 1.4	-0.0134214	-0.00926028
KEGG_Pentose_phosphate_Main_Pathway - KEGG Adjusted 1.5	0.00817083	-0.0094971
KEGG_Tight_junction_Main_Pathway - KEGG Adjusted 1.5	0.00181979	-0.00951162
reactome_Synthesis_of_bile_acids_and_bile_salts_via_24_hydroxycholesterol_Main_Pathway - Reactome 1.3	0.0271318	-0.00953843
AHR_Pathway_Cath_D_expression_via_SP1 - Primary 1.4	0.0074438	-0.00995565
biocarta_insulin_signaling_Main_Pathway - Biocarta 1.2	-0.0692827	-0.00998582
NCI_Aurora_A_signaling_Pathway_(centrosome_duplication) - NCI 1.2	0.00242822	-0.0107599
reactome_Synthesis_secretion_and_deacylation_of_Ghrelin_Main_Pathway - Reactome 1.3	-0.0204241	-0.0122808
bile_acid_biosynthesis_neutral_pathway - Metabolism 1.4	0.0244743	-0.0128656
reactome_Activation_of_ATR_in_response_to_replication_stress_Main_Pathway - Reactome 1.3	-0.0685785	-0.0130287
reactome_Synthesis_secretion_and_inactivation_of_Glucagon_like_Peptide_1_GLP_1__Main_Pathway - Reactome 1.3	0.0060969	-0.0131617
reactome_Synthesis_secretion_and_inactivation_of_Glucose_dependent_Insulinotropic_Polypeptide_GIP__Main_Pathway - Reactome 1.3	0.0060969	-0.0131617
KEGG_TNF_signaling_Main_Pathway - KEGG Adjusted 1.5	-0.0511843	-0.0133164
reactome_Acetylcholine_regulates_insulin_secretion_Main_Pathway - Reactome 1.3	-0.0280341	-0.0138699
reactome_Polymerase_switching_Main_Pathway - Reactome 1.3	-0.0864884	-0.0140587
reactome_Polymerase_switching_on_the_C_strand_of_the_telomere_Main_Pathway - Reactome 1.3	-0.0864884	-0.0140587
biocarta_regulation_of_pgc_1a_Main_Pathway - Biocarta 1.2	-0.0224526	-0.0141704
reactome_ERKs_are_inactivated_Main_Pathway - Reactome 1.3	-0.0200962	-0.0142206
biocarta_inhibition_of_cellular_proliferation_by_gleevec_Main_Pathway - Biocarta 1.2	-0.0300751	-0.0142732
biocarta_il_3_signaling_Main_Pathway - Biocarta 1.2	0.0118042	-0.014377
KEGG_Protein_export_Main_Pathway - KEGG Adjusted 1.5	-0.0055586	-0.0144089
cholesterol_biosynthesis_I - Metabolism 1.4	0.0233483	-0.0150478
cholesterol_biosynthesis_II_via_2425-dihydrolanosterol - Metabolism 1.4	0.0233483	-0.0150478
cholesterol_biosynthesis_III_via_desmosterol - Metabolism 1.4	0.0233483	-0.0150478
reactome_Pyrimidine_catabolism_Main_Pathway - Reactome 1.3	0.0544508	-0.015207
reactome_ABC_family_proteins_mediated_transport_Main_Pathway - Reactome 1.3	-0.0400994	-0.0156014
NCI_BCR_signaling_Main_Pathway - NCI 1.2	-0.0112974	-0.015665
NCI_Signaling_events_mediated_by_VEGFR1_and_VEGFR2_Pathway_(cell_proliferation) - NCI 1.2	-0.0179231	-0.015698
Akt_Signaling_Pathway_Blocks_Apoptosis - Primary 1.4	-0.0304206	-0.0158002
NCI_BCR_signaling_Pathway_(cytokine_secretion) - NCI 1.2	0.00998491	-0.0158979
biocarta_regulation_of_bad_phosphorylation_Main_Pathway - Biocarta 1.2	-0.00743603	-0.0159108
CDC42_Pathway - Cytoskeleton 1.2	-0.0151089	-0.0159594
reactome_Synthesis_of_bile_acids_and_bile_salts_via_27_hydroxycholesterol_Main_Pathway - Reactome 1.3	-0.024217	-0.0162576
NCI_ErbB2_ErbB3_signaling_events_Pathway_(myelination) - NCI 1.2	0.00311319	-0.0165587
NCI_Signaling_events_regulated_by_Ret_tyrosine_kinase_Pathway_(lamellipodium_assembly) - NCI 1.2	-0.0449903	-0.0166743
reactome_Pre_NOTCH_Processing_in_Golgi_Main_Pathway - Reactome 1.3	-0.00275477	-0.0169687
reactome_Dissolution_of_Fibrin_Clot_Main_Pathway - Reactome 1.3	-0.0224382	-0.0170424
KEGG_Nicotinate_and_nicotinamide_metabolism_Main_Pathway - KEGG Adjusted 1.5	-0.0243822	-0.0175574
NCI_Signaling_mediated_by_p38_alpha_and_p38_beta_Main_Pathway - NCI 1.2	-0.034643	-0.0182589
NCI_Neurotrophic_factor_mediated_Trk_receptor_signaling_Pathway_(MAPKKK_cascade) - NCI 1.2	-0.0131567	-0.0187426
reactome_RNA_Pol_II_CTD_phosphorylation_and_interaction_with_CE_Main_Pathway - Reactome 1.3	-0.0265213	-0.0191201
biocarta_regulation_of_ck1_cdk5_by_type_1_glutamate_receptors_Main_Pathway - Biocarta 1.2	-0.0172434	-0.0196351
KEGG_Neurotrophin_signaling_Main_Pathway - KEGG Adjusted 1.5	-0.00807296	-0.0201763
HGF_Pathway_Regulation_of_Cytoskeleton_Cell_Polarity_and_Cell_Motility - Primary 1.4	-0.00696353	-0.0202171
reactome_Deadenylation_of_mRNA_Main_Pathway - Reactome 1.3	0.0172577	-0.02045
biocarta_mechanism_of_protein_import_into_the_nucleus_Main_Pathway - Biocarta 1.2	0.00537909	-0.0210387
reactome_Activation_of_Matrix_Metalloproteinases_Main_Pathway - Reactome 1.3	-0.00700551	-0.0214487
NCI_Integrins_in_angiogenesis_Pathway_(angiogenesis) - NCI 1.2	0.0320253	-0.0218475
Akt_Signaling_Pathway_Cell_Cycle_Progression - Primary 1.4	-0.015603	-0.0221111
reactome_RNA_Polymerase_II_Transcription_Elongation_Main_Pathway - Reactome 1.3	-0.032083	-0.0224027
reactome_APC_C_Cdc20_mediated_degradation_of_mitotic_proteins_Main_Pathway - Reactome 1.3	-0.0680587	-0.0225825
reactome_Inactivation_of_APC_C_via_direct_inhibition_of_the_APC_C_complex_Main_Pathway - Reactome 1.3	-0.0680587	-0.0225825
NCI_LKB1_signaling_events_Pathway_(establishment_of_cell_polarity) - NCI 1.2	-0.0202948	-0.0226361
NCI_Notch_signaling_Main_Pathway - NCI 1.2	-0.00909819	-0.02264
reactome_Smooth_Muscle_Contraction_Main_Pathway - Reactome 1.3	-0.0453186	-0.0226479
NCI_Signaling_events_mediated_by_focal_adhesion_kinase_Pathway_(negative_regulation_of_cell_adhesion_involved_in_substrate_bound_cell_migration) - NCI 1.2	-0.00386863	-0.022754
Ras_Pathway_Gene_Expression_Cell_Proliferation_Cell_Survival_Differentiation_Development_Cell_Cycle_Control_Cell_Motility_Tumorigenesis_via_ELK4_ATF2_MEF2D_STAT2_CREB3_CCNA1_MYC_ELK1_JUN_CDK4 - Primary 1.4	-0.0204116	-0.0235985
KEGG_Glycosphingolipid_biosynthesis_globo_series_Main_Pathway - KEGG Adjusted 1.5	-0.0585914	-0.0239342
fatty_acid_beta-oxidation_peroxisome - Metabolism 1.4	0.0649473	-0.0241001
NCI_Sphingosine_1_phosphate_S1P_Main_Pathway - NCI 1.2	-0.0271743	-0.0241084
L-kynurenine_degradation - Metabolism 1.4	-0.00811151	-0.0243436
reactome_Synthesis_of_PC_Main_Pathway - Reactome 1.3	-0.0583082	-0.0244424
reactome_Intrinsic_Pathway_Main_Pathway - Reactome 1.3	0.0229903	-0.0244514
biocarta_hiv_1_nef_negative_effector_of_fas_and_tnf_Pathway_(Pathway_protein_ubiquitination_of_CHUK) - Biocarta 1.2	0.0126743	-0.024591
reactome_EPHA_mediated_growth_cone_collapse_Main_Pathway - Reactome 1.3	0.00398762	-0.0246502
reactome_RNA_Polymerase_II_HIV_Promoter_Escape_Main_Pathway - Reactome 1.3	-0.0476914	-0.0248692
reactome_RNA_Polymerase_II_Promoter_Escape_Main_Pathway - Reactome 1.3	-0.0476914	-0.0248692
HIF1Alpha_Pathway - Primary 1.4	-0.0523088	-0.0251864
HIF1Alpha_Pathway_p53_Hypoxia_Pathway - Primary 1.4	-0.0523088	-0.0251864
heparan_sulfate_biosynthesis_late_stages - Metabolism 1.4	0.0110231	-0.0253562
reactome_Iron_uptake_and_transport_Main_Pathway - Reactome 1.3	-0.0333028	-0.0263599
reactome_Dual_incision_reaction_in_TC_NER_Main_Pathway - Reactome 1.3	-0.0365732	-0.0265275
NCI_Signaling_events_mediated_by_HDAC_Class_I_Pathway_(histone_deacetylation) - NCI 1.2	-0.0479404	-0.0267995
reactome_Activation_of_the_pre_replicative_complex_Main_Pathway - Reactome 1.3	-0.0815119	-0.0279272
Akt_Signaling_Pathway_JNK_mediated_apoptosis - Primary 1.4	-0.0311263	-0.0296765
KEGG_Sphingolipid_metabolism_Main_Pathway - KEGG Adjusted 1.5	-0.0313415	-0.0297558
KEGG_Linoleic_acid_metabolism_Main_Pathway - KEGG Adjusted 1.5	-0.0309415	-0.0300552
biocarta_map_kinase_inactivation_of_smrt_corepressor_Main_Pathway - Biocarta 1.2	-0.0712473	-0.0314867
biocarta_mechanisms_of_transcriptional_repression_by_dna_methylation_Main_Pathway - Biocarta 1.2	-0.0553243	-0.0315867
biocarta_mechanisms_of_transcriptional_repression_by_dna_methylation_Pathway_(histone_deacetylation) - Biocarta 1.2	-0.0553243	-0.0315867
Angiotensin-PTK2B_Pathway - Cytoskeleton 1.2	-0.0311295	-0.0317487
KEGG_RNA_polymerase_Main_Pathway - KEGG Adjusted 1.5	-0.0109389	-0.0319112
KEGG_Gastric_acid_secretion_Main_Pathway - KEGG Adjusted 1.5	-0.0163295	-0.0319274
adenosine_deoxyribonucleotides_ide_novoi_biosynthesis - Metabolism 1.4	-0.00196638	-0.0319559
KEGG_Basal_transcription_factors_Main_Pathway - KEGG Adjusted 1.5	-0.0622883	-0.0326055
Akt_Signaling_Pathway_Acetylation_of_proteins - Primary 1.4	-0.0361072	-0.0330434
reactome_Signaling_by_constitutively_active_EGFR_Main_Pathway - Reactome 1.3	-0.0675043	-0.0334908
reactome_RNA_Polymerase_II_Pre_transcription_Events_Main_Pathway - Reactome 1.3	-0.0500397	-0.0338063
reactome_Activation_of_IRF3_IRF7_mediated_by_TBK1_IKK_epsilon_Main_Pathway - Reactome 1.3	-0.0586694	-0.033846
reactome_Insulin_receptor_recycling_Main_Pathway - Reactome 1.3	-0.0431028	-0.0340247
reactome_DARPP_32_events_Main_Pathway - Reactome 1.3	-0.0607628	-0.0340968
Chemotaxis_Driven_by_IL-8_and_LTB4 - Cytoskeleton 1.2	-0.0315433	-0.0344403
reactome_APC_C_Cdc20_mediated_degradation_of_Cyclin_B_Main_Pathway - Reactome 1.3	-0.0801408	-0.0347424
reactome_Activation_of_DNA_fragmentation_factor_Main_Pathway - Reactome 1.3	0.0189822	-0.0349759
KEGG_GABAergic_synapse_Main_Pathway - KEGG Adjusted 1.5	-0.0165527	-0.0355188
NCI_BARD1_signaling_events_Main_Pathway - NCI 1.2	-0.0631742	-0.0357724
biocarta_lissencephaly_gene_lis1_in_neuronal_migration_and_development_Pathway_(retrograde_axon_cargo_transport) - Biocarta 1.2	-0.0342647	-0.0358819
biocarta_multi_step_regulation_of_transcription_by_pitx2_Main_Pathway - Biocarta 1.2	-0.0198354	-0.036079
NCI_Signaling_events_mediated_by_PTP1B_Main_Pathway - NCI 1.2	-0.0923389	-0.0362483
NCI_Signaling_events_regulated_by_Ret_tyrosine_kinase_Main_Pathway - NCI 1.2	-0.0563156	-0.0364264
KEGG_Collecting_duct_acid_secretion_Main_Pathway - KEGG Adjusted 1.5	-0.0667487	-0.0368604
NCI_Aurora_A_signaling_Pathway_(spindle_assembly) - NCI 1.2	-0.0385831	-0.0369448
IGF1R_Signaling_Pathway_Protein_Synthesis - Primary 1.4	-0.0358937	-0.0371006
NCI_Neurotrophic_factor_mediated_Trk_receptor_signaling_Pathway_(neuron_projection_morphogenesis) - NCI 1.2	-0.0398869	-0.0373704
reactome_Downregulation_of_SMAD2_3_SMAD4_transcriptional_activity_Main_Pathway - Reactome 1.3	-0.0398559	-0.0374273
reactome_Prefoldin_mediated_transfer_of_substrate_to_CCT_TriC_Main_Pathway - Reactome 1.3	-0.065299	-0.0391175
NCI_ATM_Main_Pathway - NCI 1.2	-0.0653184	-0.039213
Cell_Adhesion_Regulated_by_CDHs - Cytoskeleton 1.2	-0.0532136	-0.0394001
KEGG_Regulation_of_lipolysis_in_adipocytes_Main_Pathway - KEGG Adjusted 1.5	-0.034454	-0.0394883
IGF1R_Signaling_Pathway_Gene_Expression_Proliferation_Growth_Survival_via_NFAT5_CREB3 - Primary 1.4	-0.0564495	-0.0395771
CDK5_Pathway_in_Central_Nervous_System - Cytoskeleton 1.2	-0.0705139	-0.040277
NCI_Notch_mediated_HES_HEY_network_Main_Pathway - NCI 1.2	-0.0482377	-0.0406847
IL-2_Pathway_Gene_Expression_via_FYN_LYN_RPS6KB1_PTK2B - Primary 1.4	-0.0405468	-0.0413488
KEGG_Protein_processing_in_endoplasmic_reticulum_Main_Pathway - KEGG Adjusted 1.5	-0.0478774	-0.0421414
reactome_Polo_like_kinase_mediated_events_Main_Pathway - Reactome 1.3	-0.0327925	-0.043049
Ras_Pathway_Cell-Cell_Junctions - Primary 1.4	-0.0462018	-0.0431596
biocarta_rho_selective_guanine_exchange_factor_akap13_mediates_stress_fiber_formation_Main_Pathway - Biocarta 1.2	-0.0388506	-0.043607
IL-10_Pathway_Translational_Modulation - Primary 1.4	-0.0159722	-0.0438209
HIF1Alpha_Pathway_Gene_Expression_via_JUN_CREB3 - Primary 1.4	-0.0856055	-0.0447866
HIF1Alpha_Pathway_NOS_Pathway - Primary 1.4	-0.0856055	-0.0447866
HIF1Alpha_Pathway_VEGF_Pathway - Primary 1.4	-0.0856055	-0.0447866
reactome_Dual_incision_reaction_in_GG_NER_Main_Pathway - Reactome 1.3	-0.0274722	-0.0456468
NCI_E_cadherin_signaling_in_the_nascent_adherens_junction_Pathway_(regulation_of_actin_nucleation) - NCI 1.2	-0.0346876	-0.0457093
reactome_Synthesis_of_Prostaglandins_PG_and_Thromboxanes_TX__Main_Pathway - Reactome 1.3	-0.0332162	-0.0458624
reactome_Activated_NOTCH1_Transmits_Signal_to_the_Nucleus_Main_Pathway - Reactome 1.3	-0.0632763	-0.046102
NCI_ErbB2_ErbB3_signaling_events_Main_Pathway - NCI 1.2	-0.00604655	-0.0466516
NCI_LKB1_signaling_events_Main_Pathway - NCI 1.2	-0.0536568	-0.0471046
reactome_RNA_Polymerase_III_Transcription_Termination_Main_Pathway - Reactome 1.3	-0.0500964	-0.0475927
NCI_E_cadherin_signaling_in_the_nascent_adherens_junction_Main_Pathway - NCI 1.2	-0.0497118	-0.0477782
reactome_RNA_Polymerase_III_Transcription_Initiation_From_Type_2_Promoter_Main_Pathway - Reactome 1.3	-0.0136884	-0.0478519
Akt_Signaling_Pathway_Increased_GLUT4_translocation - Primary 1.4	-0.063397	-0.0480233
reactome_Processing_of_Intronless_Pre_mRNAs_Main_Pathway - Reactome 1.3	-0.0848962	-0.0481742
reactome_EGFR_downregulation_Main_Pathway - Reactome 1.3	0.00967711	-0.0481814
KEGG_Glycerophospholipid_metabolism_Main_Pathway - KEGG Adjusted 1.5	-0.0825484	-0.048373
NCI_Signaling_events_mediated_by_TCPTP_Pathway_(G1_S_transition_of_mitotic_cell_cycle) - NCI 1.2	-0.0540857	-0.048602
NCI_Signaling_events_mediated_by_TCPTP_Pathway_(MAPKKK_cascade) - NCI 1.2	-0.0540857	-0.048602
Calcium2+_Signaling - Cytoskeleton 1.2	-0.0638558	-0.0487673
KEGG_Fanconi_anemia_Main_Pathway - KEGG Adjusted 1.5	-0.0848043	-0.0493125
NCI_Arf6_trafficking_events_Pathway_(clathrin_coat_assembly) - NCI 1.2	-0.0893423	-0.0496264
KEGG_Taste_transduction_Main_Pathway - KEGG Adjusted 1.5	-0.0276602	-0.049895
reactome_Signaling_by_FGFR_mutants_Main_Pathway - Reactome 1.3	-0.0528146	-0.0499771
reactome_APC_Cdc20_mediated_degradation_of_Nek2A_Main_Pathway - Reactome 1.3	-0.0882322	-0.050191
NCI_Nectin_adhesion_Main_Pathway - NCI 1.2	-0.0376497	-0.0504792
NAD_ide_novoi_biosynthesis - Metabolism 1.4	-0.0334945	-0.0510233
KEGG_Aldosterone_regulated_sodium_reabsorption_Main_Pathway - KEGG Adjusted 1.5	-0.0554475	-0.0519074
reactome_RNA_Polymerase_III_Abortive_And_Retractive_Initiation_Main_Pathway - Reactome 1.3	-0.0305455	-0.0522973
reactome_Striated_Muscle_Contraction_Main_Pathway - Reactome 1.3	-0.127584	-0.0526877
reactome_ISG15_antiviral_mechanism_Main_Pathway - Reactome 1.3	-0.0427013	-0.0527391
reactome_RNA_Polymerase_III_Transcription_Initiation_From_Type_1_Promoter_Main_Pathway - Reactome 1.3	-0.0180718	-0.0528675
biocarta_repression_of_pain_sensation_by_the_transcriptional_regulator_dream_Main_Pathway - Biocarta 1.2	-0.0661727	-0.0537059
biocarta_mets_affect_on_macrophage_differentiation_Main_Pathway - Biocarta 1.2	-0.0477826	-0.0544125
reactome_Signaling_by_FGFR1_fusion_mutants_Main_Pathway - Reactome 1.3	-0.0729429	-0.0547923
biocarta_il_6_signaling_Main_Pathway - Biocarta 1.2	-0.0791265	-0.0549537
KEGG_Amino_sugar_and_nucleotide_sugar_metabolism_Main_Pathway - KEGG Adjusted 1.5	-0.0545172	-0.0550375
reactome_Keratan_sulfate_biosynthesis_Main_Pathway - Reactome 1.3	-0.0648837	-0.0553195
KEGG_Adipocytokine_signaling_Main_Pathway - KEGG Adjusted 1.5	-0.0668678	-0.0554536
reactome_Synthesis_of_Leukotrienes_LT_and_Eoxins_EX__Main_Pathway - Reactome 1.3	-0.0263318	-0.0556178
biocarta_regulators_of_bone_mineralization_Main_Pathway - Biocarta 1.2	-0.0359047	-0.0563042
heparan_sulfate_biosynthesis - Metabolism 1.4	-0.0579618	-0.0564612
reactome_Signaling_by_ERBB2_Main_Pathway - Reactome 1.3	-0.0695926	-0.056946
NCI_E_cadherin_signaling_in_keratinocytes_Main_Pathway - NCI 1.2	-0.087062	-0.0578854
reactome_Signaling_by_NOTCH3_Main_Pathway - Reactome 1.3	-0.0460182	-0.0593723
reactome_Signaling_by_NOTCH4_Main_Pathway - Reactome 1.3	-0.0460182	-0.0593723
KEGG_p53_signaling_Main_Pathway - KEGG Adjusted 1.5	-0.0525702	-0.0594633
reactome_regulation_of_FZD_by_ubiquitination_Main_Pathway - Reactome 1.3	-0.0638495	-0.061459
NCI_Signaling_events_mediated_by_HDAC_Class_I_Main_Pathway - NCI 1.2	-0.0708406	-0.0614701
NCI_Arf6_trafficking_events_Pathway_(calcium_ion_dependent_exocytosis) - NCI 1.2	-0.0910356	-0.0614897
Hedgehog_Signaling_in_Mammals_no_Tubulin_Pathway - Primary 1.4	-0.0538048	-0.0617075
reactome_RNA_Polymerase_III_Transcription_Initiation_From_Type_3_Promoter_Main_Pathway - Reactome 1.3	-0.0475927	-0.0631245
reactome_temp_Nuclear_Receptor_transcription_pathway - Reactome 1.3	-0.103509	-0.0641003
reactome_KSRP_destabilizes_mRNA_Main_Pathway - Reactome 1.3	-0.0188676	-0.0643165
reactome_snRNP_Assembly_Main_Pathway - Reactome 1.3	-0.0523607	-0.0652241
reactome_RNA_Polymerase_III_Chain_Elongation_Main_Pathway - Reactome 1.3	-0.0483646	-0.0656899
KEGG_PPAR_signaling_Main_Pathway - KEGG Adjusted 1.5	-0.0565355	-0.0664875
KEGG_Steroid_biosynthesis_Main_Pathway - KEGG Adjusted 1.5	-0.0190838	-0.0665713
reactome_Sphingolipid_de_novo_biosynthesis_Main_Pathway - Reactome 1.3	-0.0607102	-0.0680938
NCI_Signaling_mediated_by_p38_gamma_and_p38_delta_Main_Pathway - NCI 1.2	-0.0722113	-0.0682776
KEGG_Ubiquitin_mediated_proteolysis_Main_Pathway - KEGG Adjusted 1.5	-0.0581259	-0.0698421
reactome_repression_of_WNT_target_genes_Main_Pathway - Reactome 1.3	-0.0665312	-0.0702587
HGF_Pathway_Gene_Expression_via_JUN_STAT3_FOS_ELK1_ETS2 - Primary 1.4	-0.0910088	-0.070829
Hedgehog_Signaling_in_Mammals_Pathway - Primary 1.4	-0.0649378	-0.0709318
reactome_ADP_signalling_through_P2Y_purinoceptor_1_Main_Pathway - Reactome 1.3	-0.0669463	-0.0709625
reactome_Processing_of_Capped_Intron_Containing_Pre_mRNA_Main_Pathway - Reactome 1.3	-0.0770857	-0.0713183
KEGG_alpha_Linolenic_acid_metabolism_Main_Pathway - KEGG Adjusted 1.5	-0.119694	-0.0720232
biocarta_role_of_erbb2_in_signal_transduction_and_oncology_Main_Pathway - Biocarta 1.2	-0.155243	-0.0730626
reactome_temp_Post-translational_modification_synthesis_of_GPI-anchored_proteins - Reactome 1.3	-0.113245	-0.0732754
dermatan_sulfate_biosynthesis - Metabolism 1.4	-0.103126	-0.0735547
NCI_BARD1_signaling_events_Pathway_(DNA_repair) - NCI 1.2	-0.111408	-0.0737222
NCI_E_cadherin_signaling_in_keratinocytes_Pathway_(adherens_junction_organization) - NCI 1.2	-0.0541919	-0.0744612
Ras_Pathway_Golgi_Trafficking_and_Vesicle_Formation - Primary 1.4	-0.0663987	-0.0753788
ATM_Pathway - Primary 1.4	-0.101258	-0.0754704
reactome_Depolymerisation_of_the_Nuclear_Lamina_Main_Pathway - Reactome 1.3	-0.0711677	-0.0759631
3-phosphoinositide_degradation - Metabolism 1.4	-0.0750465	-0.0761044
KEGG_RNA_transport_Main_Pathway - KEGG Adjusted 1.5	-0.0814538	-0.0762379
reactome_pre_mRNA_splicing_Main_Pathway - Reactome 1.3	-0.0811525	-0.0769344
biocarta_keratinocyte_differentiation_Pathway_(apoptosis) - Biocarta 1.2	-0.0752013	-0.0769657
reactome_Presynaptic_function_of_Kainate_receptors_Main_Pathway - Reactome 1.3	-0.0548313	-0.0780704
KEGG_Arachidonic_acid_metabolism_Main_Pathway - KEGG Adjusted 1.5	-0.0722727	-0.0788395
KEGG_Synthesis_and_degradation_of_ketone_bodies_Main_Pathway - KEGG Adjusted 1.5	-0.0180068	-0.0797461
reactome_Synthesis_of_PA_Main_Pathway - Reactome 1.3	-0.0608255	-0.0805755
KEGG_Pantothenate_and_CoA_biosynthesis_Main_Pathway - KEGG Adjusted 1.5	-0.0830879	-0.0805777
reactome_Purine_catabolism_Main_Pathway - Reactome 1.3	-0.0429661	-0.081272
NCI_E_cadherin_signaling_in_keratinocytes_Pathway_(keratinocyte_differentiation) - NCI 1.2	-0.0795186	-0.0857464
KEGG_Alcoholism_Main_Pathway - KEGG Adjusted 1.5	-0.0621902	-0.0858754
reactome_Activation_of_the_AP_1_family_of_transcription_factors_Main_Pathway - Reactome 1.3	-0.0527302	-0.0861173
reactome_Interleukin_7_signaling_Main_Pathway - Reactome 1.3	-0.119667	-0.0865731
NCI_Signaling_events_mediated_by_TCPTP_Pathway_(positive_regulation_of_S_phase_of_mitotic_cell_cycle) - NCI 1.2	-0.0387351	-0.0872154
NCI_N_cadherin_signaling_events_Pathway_(regulation_of_cell_cell_adhesion) - NCI 1.2	-0.0720944	-0.0887988
NCI_Arf6_signaling_events_Main_Pathway - NCI 1.2	-0.0907101	-0.0889653
biocarta_keratinocyte_differentiation_Main_Pathway - Biocarta 1.2	-0.0835068	-0.0908191
TGF-Beta_Pathway_Post_Transciptional_G1_Arrest - Primary 1.4	-0.0873434	-0.0930918
biocarta_lissencephaly_gene_lis1_in_neuronal_migration_and_development_Main_Pathway - Biocarta 1.2	-0.109864	-0.0937598
reactome_Synthesis_of_glycosylphosphatidylinositol_GPI__Main_Pathway - Reactome 1.3	-0.0788756	-0.09567
biocarta_stathmin_and_breast_cancer_resistance_to_antimicrotubule_agents_Main_Pathway - Biocarta 1.2	-0.0913248	-0.0963827
NCI_ErbB1_downstream_signaling_Pathway_(cell_proliferation) - NCI 1.2	-0.0558152	-0.0972758
biocarta_keratinocyte_differentiation_Pathway_(keratinocyte_differentiation) - Biocarta 1.2	-0.113642	-0.0977863
NCI_E_cadherin_signaling_in_keratinocytes_Pathway_(apoptosis) - NCI 1.2	-0.0937976	-0.0985252
reactome_Interferon_gamma_signaling_Main_Pathway - Reactome 1.3	-0.0703095	-0.0990379
NCI_EPHA2_forward_signaling_Main_Pathway - NCI 1.2	-0.0898467	-0.0995172
TGF-Beta_Pathway_Transciption_Arrested_Growth_Apoptosis - Primary 1.4	-0.101839	-0.101355
TGF-Beta_Pathway_Transciption_Cell_Growth_and_Mobility_and_Angiogenesis - Primary 1.4	-0.101839	-0.101355
KEGG_Bladder_cancer_Main_Pathway - KEGG Adjusted 1.5	-0.107285	-0.104925
reactome_ADP_signalling_through_P2Y_purinoceptor_12_Main_Pathway - Reactome 1.3	-0.0723352	-0.107164
NCI_N_cadherin_signaling_events_Pathway_(actin_filament_polymerization) - NCI 1.2	-0.0913438	-0.113088
reactome_Prostacyclin_signalling_through_prostacyclin_receptor_Main_Pathway - Reactome 1.3	-0.059043	-0.113515
KEGG_Base_excision_repair_Main_Pathway - KEGG Adjusted 1.5	-0.158417	-0.116089
KEGG_Circadian_rhythm_Main_Pathway - KEGG Adjusted 1.5	-0.0753194	-0.116261
KEGG_Spliceosome_Main_Pathway - KEGG Adjusted 1.5	-0.112121	-0.121094
reactome_IRAK2_mediated_activation_of_TAK1_complex_Main_Pathway - Reactome 1.3	-0.10608	-0.121192
reactome_IRAK2_mediated_activation_of_TAK1_complex_upon_TLR7_8_or_9_stimulation_Main_Pathway - Reactome 1.3	-0.10608	-0.121192
reactome_Activation_of_G_protein_gated_Potassium_channels_Main_Pathway - Reactome 1.3	-0.0747183	-0.123724
reactome_Inhibition_of_voltage_gated_Ca2_channels_via_Gbeta_gamma_subunits_Main_Pathway - Reactome 1.3	-0.0747183	-0.123724
reactome_Hyaluronan_uptake_and_degradation_Main_Pathway - Reactome 1.3	-0.0907701	-0.126492
NCI_N_cadherin_signaling_events_Pathway_(myoblast_differentiation) - NCI 1.2	-0.115004	-0.128885
NCI_AP_1_transcription_factor_network_Main_Pathway - NCI 1.2	-0.109562	-0.1299
Akt_Pathway_Regulation_by_GH - Cytoskeleton 1.2	-0.133208	-0.135735
chondroitin_sulfate_biosynthesis - Metabolism 1.4	-0.154351	-0.135909
IGF1R_Signaling_Pathway_Apoptosis - Primary 1.4	-0.133257	-0.146817
HGF_Pathway_Cell_Cycle_Progression - Primary 1.4	-0.11639	-0.150446
reactome_Detoxification_of_Reactive_Oxygen_Species_Main_Pathway - Reactome 1.3	-0.147273	-0.15262
biocarta_mapkinase_signaling_Main_Pathway - Biocarta 1.2	-0.142009	-0.158437
biocarta_oxidative_stress_induced_gene_expression_via_nrf2_Main_Pathway - Biocarta 1.2	NA	NA
reactome_Activated_point_mutants_of_FGFR2_Main_Pathway - Reactome 1.3	NA	NA
reactome_E2F_mediated_regulation_of_DNA_replication_Main_Pathway - Reactome 1.3	NA	NA

## Sheet: Lung_Adenocarcinoma
Pathway	Pearson	Spearman
reactome_Acetylcholine_Neurotransmitter_Release_Cycle_Main_Pathway - Reactome 1.3	0.880692	0.907771
Tumour_Infiltration_Pathway - Primary 1.4	0.825368	0.891884
reactome_Dopamine_Neurotransmitter_Release_Cycle_Main_Pathway - Reactome 1.3	0.825368	0.891884
KEGG_Thyroid_hormone_synthesis_Main_Pathway - KEGG Adjusted 1.5	0.642047	0.872295
reactome_Activation_of_the_pre_replicative_complex_Main_Pathway - Reactome 1.3	0.85849	0.864742
reactome_Activation_of_ATR_in_response_to_replication_stress_Main_Pathway - Reactome 1.3	0.856447	0.857283
KEGG_Osteoclast_differentiation_Main_Pathway - KEGG Adjusted 1.5	0.874516	0.852738
reactome_Polymerase_switching_Main_Pathway - Reactome 1.3	0.841344	0.851518
reactome_Polymerase_switching_on_the_C_strand_of_the_telomere_Main_Pathway - Reactome 1.3	0.841344	0.851518
reactome_Activation_of_gene_expression_by_SREBF_SREBP__Main_Pathway - Reactome 1.3	0.801705	0.839654
biocarta_the_co_stimulatory_signal_during_t_cell_activation_Pathway_(T_cell_activation) - Biocarta 1.2	0.84191	0.835925
reactome_Pyrimidine_catabolism_Main_Pathway - Reactome 1.3	0.798414	0.830923
reactome_Interleukin_2_signaling_Main_Pathway - Reactome 1.3	0.831567	0.823833
NCI_JNK_signaling_in_the_CD4_TCR_Main_Pathway - NCI 1.2	0.825506	0.819068
reactome_temp_Immunoregulatory_interactions_between_a_Lymphoid_and_a_non-Lymphoid_cell - Reactome 1.3	0.780466	0.813829
reactome_APC_C_Cdc20_mediated_degradation_of_Cyclin_B_Main_Pathway - Reactome 1.3	0.737193	0.812487
NCI_BCR_signaling_Main_Pathway - NCI 1.2	0.813881	0.81168
reactome_Signaling_by_NODAL_Main_Pathway - Reactome 1.3	0.803845	0.80265
Development_of_Immune_Synapse - Cytoskeleton 1.2	0.78835	0.799342
biocarta_role_of_mef2d_in_t_cell_apoptosis_Main_Pathway - Biocarta 1.2	0.736813	0.79384
KEGG_Legionellosis_Main_Pathway - KEGG Adjusted 1.5	0.765755	0.791936
NCI_EPO_signaling_Main_Pathway - NCI 1.2	0.81754	0.791795
NCI_Beta5_beta6_beta7_and_beta8_integrin_cell_surface_interactions_Main_Pathway - NCI 1.2	0.732054	0.784486
IGF1R_Signaling_Pathway_Gene_Expression_Proliferation_Growth_Survival_via_NFAT5_CREB3 - Primary 1.4	0.722984	0.784266
reactome_Downstream_TCR_signaling_Main_Pathway - Reactome 1.3	0.813679	0.783977
biocarta_il_7_signal_transduction_Main_Pathway - Biocarta 1.2	0.759681	0.780914
IGF1R_Signaling_Pathway_Apoptosis - Primary 1.4	0.758533	0.778466
biocarta_keratinocyte_differentiation_Main_Pathway - Biocarta 1.2	0.779048	0.777141
biocarta_lck_and_fyn_tyrosine_kinases_in_initiation_of_tcr_activation_Main_Pathway - Biocarta 1.2	0.722106	0.775851
NCI_Atypical_NF_kappaB_Main_Pathway - NCI 1.2	0.824952	0.774316
reactome_APC_C_Cdc20_mediated_degradation_of_mitotic_proteins_Main_Pathway - Reactome 1.3	0.721101	0.772218
reactome_Inactivation_of_APC_C_via_direct_inhibition_of_the_APC_C_complex_Main_Pathway - Reactome 1.3	0.721101	0.772218
KEGG_Folate_biosynthesis_Main_Pathway - KEGG Adjusted 1.5	0.736169	0.771727
NCI_BCR_signaling_Pathway_(cytokine_secretion) - NCI 1.2	0.785088	0.768559
biocarta_t_cell_receptor_signaling_Main_Pathway - Biocarta 1.2	0.761114	0.767234
biocarta_induction_of_apoptosis_through_dr3_and_dr4_5_death_receptors_Pathway_(Pathway_degradation_of_CASP3_CASP10_CASP10) - Biocarta 1.2	0.499631	0.765514
NCI_ErbB1_downstream_signaling_Pathway_(cell_proliferation) - NCI 1.2	0.773129	0.765111
reactome_APC_Cdc20_mediated_degradation_of_Nek2A_Main_Pathway - Reactome 1.3	0.723165	0.7649
STAT3_Pathway - Primary 1.4	0.683786	0.759512
NCI_Signaling_events_mediated_by_VEGFR1_and_VEGFR2_Pathway_(cell_proliferation) - NCI 1.2	0.743084	0.758494
reactome_ISG15_antiviral_mechanism_Main_Pathway - Reactome 1.3	0.753429	0.757029
KEGG_alpha_Linolenic_acid_metabolism_Main_Pathway - KEGG Adjusted 1.5	0.682132	0.756643
reactome_Purine_catabolism_Main_Pathway - Reactome 1.3	0.62324	0.754721
Chemotaxis_Driven_by_CCR4 - Cytoskeleton 1.2	0.729929	0.753686
Chemotaxis_of_Immune_Cells_During_Allergic_Asthma_and_Eczema_Driven_by_CCR4 - Cytoskeleton 1.2	0.729929	0.753686
reactome_Synthesis_of_bile_acids_and_bile_salts_via_24_hydroxycholesterol_Main_Pathway - Reactome 1.3	0.734846	0.752325
NCI_Aurora_B_signaling_Main_Pathway - NCI 1.2	0.707229	0.749254
HGF_Pathway_Gene_Expression_via_JUN_STAT3_FOS_ELK1_ETS2 - Primary 1.4	0.735453	0.747938
reactome_Synthesis_of_PA_Main_Pathway - Reactome 1.3	0.674487	0.745832
KEGG_Fc_epsilon_RI_signaling_Main_Pathway - KEGG Adjusted 1.5	0.761159	0.744946
biocarta_regulation_of_pgc_1a_Main_Pathway - Biocarta 1.2	0.676476	0.744068
NCI_Alpha_synuclein_signaling_Pathway_(Pathway_negative_regulation_of_transcription_via_TOR1A_SNCA_STUB1_FKBP1A) - NCI 1.2	0.74319	0.743138
NCI_Alpha_synuclein_signaling_Pathway_(Pathway_positive_regulation_of_gene_specific_transcription_via_TOR1A_SNCA_FKBP1A_STUB1) - NCI 1.2	0.74319	0.743138
biocarta_inhibition_of_cellular_proliferation_by_gleevec_Main_Pathway - Biocarta 1.2	0.748427	0.741734
reactome_Interleukin_7_signaling_Main_Pathway - Reactome 1.3	0.749802	0.74169
IGF1R_Signaling_Pathway - Primary 1.4	0.741236	0.741383
KEGG_Taste_transduction_Main_Pathway - KEGG Adjusted 1.5	0.730374	0.738048
NCI_Signaling_events_mediated_by_the_Hedgehog_family_Pathway_(receptor_mediated_endocytosis) - NCI 1.2	0.643914	0.736478
NCI_Aurora_A_signaling_Pathway_(spindle_assembly) - NCI 1.2	0.699147	0.736276
TRAF_Pathway - Primary 1.4	0.773959	0.734565
HGF_Pathway_Cell_Scattering - Primary 1.4	0.754838	0.73345
HGF_Pathway_Cell_Survival - Primary 1.4	0.754838	0.73345
ATM_Pathway_G2-Mitosis_progression - Primary 1.4	0.719236	0.73302
ATM_Pathway_G2_M_Checkpoint_Arrest - Primary 1.4	0.719236	0.73302
NCI_Arf6_signaling_events_Main_Pathway - NCI 1.2	0.697134	0.731678
NCI_Aurora_A_signaling_Pathway_(protein_catabolic_process) - NCI 1.2	0.674259	0.73109
HGF_Pathway_Cell_Adhesion_and_Cell_Migration - Primary 1.4	0.719209	0.730432
reactome_Interferon_gamma_signaling_Main_Pathway - Reactome 1.3	0.674897	0.729695
reactome_Dissolution_of_Fibrin_Clot_Main_Pathway - Reactome 1.3	0.556557	0.728817
KEGG_Melanoma_Main_Pathway - KEGG Adjusted 1.5	0.717413	0.727966
L-kynurenine_degradation - Metabolism 1.4	0.680586	0.727922
biocarta_keratinocyte_differentiation_Pathway_(keratinocyte_differentiation) - Biocarta 1.2	0.711633	0.727782
Ras_Pathway_Increased_T-cell_Adhesion - Primary 1.4	0.710192	0.727334
KEGG_Histidine_metabolism_Main_Pathway - KEGG Adjusted 1.5	0.747008	0.726395
NCI_Signaling_events_mediated_by_TCPTP_Pathway_(regulation_of_gluconeogenesis) - NCI 1.2	0.736473	0.725535
NCI_Signaling_events_mediated_by_the_Hedgehog_family_Main_Pathway - NCI 1.2	0.626756	0.722534
biocarta_induction_of_apoptosis_through_dr3_and_dr4_5_death_receptors_Main_Pathway - Biocarta 1.2	0.504116	0.721981
Ras_Pathway - Primary 1.4	0.659279	0.720393
TRAF_Pathway_Apoptosis - Primary 1.4	0.699384	0.719621
KEGG_Synthesis_and_degradation_of_ketone_bodies_Main_Pathway - KEGG Adjusted 1.5	0.73216	0.719059
KEGG_Base_excision_repair_Main_Pathway - KEGG Adjusted 1.5	0.724583	0.717638
biocarta_internal_ribosome_entry_Main_Pathway - Biocarta 1.2	0.704152	0.71576
biocarta_internal_ribosome_entry_Pathway_(translational_initiation) - Biocarta 1.2	0.704152	0.71576
NCI_Arf6_trafficking_events_Pathway_(cell_adhesion_mediated_by_integrin) - NCI 1.2	0.688155	0.715514
KEGG_Linoleic_acid_metabolism_Main_Pathway - KEGG Adjusted 1.5	0.647136	0.71325
adenosine_ribonucleotides_ide_novoi_biosynthesis - Metabolism 1.4	0.667491	0.710065
NAD_ide_novoi_biosynthesis - Metabolism 1.4	0.689894	0.708845
TGF-Beta_Pathway - Primary 1.4	0.659248	0.70867
biocarta_il_6_signaling_Main_Pathway - Biocarta 1.2	0.672675	0.707819
NCI_Signaling_events_mediated_by_TCPTP_Pathway_(macrophage_differentiation) - NCI 1.2	0.730716	0.707547
KEGG_Thyroid_hormone_signaling_Main_Pathway - KEGG Adjusted 1.5	0.692287	0.707538
KEGG_Ras_signaling_Main_Pathway - KEGG Adjusted 1.5	0.636886	0.707143
IGF1R_Signaling_Pathway_Cell_Migration - Primary 1.4	0.686904	0.706546
KEGG_Progesterone_mediated_oocyte_maturation_Main_Pathway - KEGG Adjusted 1.5	0.717346	0.706309
TGF-Beta_Pathway_Transciption_Arrested_Growth_Apoptosis - Primary 1.4	0.698441	0.705844
TGF-Beta_Pathway_Transciption_Cell_Growth_and_Mobility_and_Angiogenesis - Primary 1.4	0.698441	0.705844
reactome_Activation_of_DNA_fragmentation_factor_Main_Pathway - Reactome 1.3	0.678991	0.704642
NCI_Signaling_events_mediated_by_TCPTP_Main_Pathway - NCI 1.2	0.66314	0.704624
reactome_DSCAM_interactions_Main_Pathway - Reactome 1.3	0.70481	0.704423
NCI_Signaling_events_mediated_by_TCPTP_Pathway_(positive_regulation_of_S_phase_of_mitotic_cell_cycle) - NCI 1.2	0.721122	0.703949
reactome_Synthesis_of_PIPs_at_the_early_endosome_membrane_Main_Pathway - Reactome 1.3	0.609721	0.703826
TNF_Signaling_Pathway_Apoptosis - Primary 1.4	0.685694	0.702729
biocarta_il_3_signaling_Main_Pathway - Biocarta 1.2	0.720949	0.700176
NCI_Alpha6_beta4_integrin_ligand_interactions_Main_Pathway - NCI 1.2	0.718907	0.698982
Ephrin-mediated_Signaling_Events_During_Cell_Adhesion - Cytoskeleton 1.2	0.56721	0.698482
KEGG_Steroid_biosynthesis_Main_Pathway - KEGG Adjusted 1.5	0.664549	0.697991
STAT3_Pathway_Growth_Arrest_and_Differentiation - Primary 1.4	0.707322	0.69642
reactome_Synthesis_of_bile_acids_and_bile_salts_via_27_hydroxycholesterol_Main_Pathway - Reactome 1.3	0.742651	0.696332
reactome_Inhibition_of_replication_initiation_of_damaged_DNA_by_RB1_E2F1_Main_Pathway - Reactome 1.3	0.695485	0.696007
IL-2_Pathway_Gene_Expression_via_FYN_LYN_RPS6KB1_PTK2B - Primary 1.4	0.684619	0.695849
reactome_Downregulation_of_SMAD2_3_SMAD4_transcriptional_activity_Main_Pathway - Reactome 1.3	0.72186	0.694902
KEGG_VEGF_signaling_Main_Pathway - KEGG Adjusted 1.5	0.678165	0.69377
NCI_Beta1_integrin_cell_surface_interactions_Main_Pathway - NCI 1.2	0.653668	0.693085
reactome_Signaling_by_FGFR1_fusion_mutants_Main_Pathway - Reactome 1.3	0.741916	0.690137
NCI_Alpha_synuclein_signaling_Pathway_(neuron_apoptosis) - NCI 1.2	0.683018	0.688908
KEGG_Retinol_metabolism_Main_Pathway - KEGG Adjusted 1.5	0.652717	0.687812
reactome_Synthesis_of_bile_acids_and_bile_salts_via_7alpha_hydroxycholesterol_Main_Pathway - Reactome 1.3	0.732947	0.68732
CDK5_Signaling_in_Neurons - Cytoskeleton 1.2	0.647348	0.686522
reactome_Dermatan_sulfate_biosynthesis_Main_Pathway - Reactome 1.3	0.56472	0.684003
IL-10_Pathway - Primary 1.4	0.711019	0.683626
reactome_Smooth_Muscle_Contraction_Main_Pathway - Reactome 1.3	0.601011	0.683608
biocarta_regulation_of_ck1_cdk5_by_type_1_glutamate_receptors_Main_Pathway - Biocarta 1.2	0.640544	0.682625
KEGG_Propanoate_metabolism_Main_Pathway - KEGG Adjusted 1.5	0.643879	0.682152
FGFR_Signaling - Cytoskeleton 1.2	0.650278	0.681932
biocarta_induction_of_apoptosis_through_dr3_and_dr4_5_death_receptors_Pathway_(apoptosis) - Biocarta 1.2	0.473902	0.681318
IL-2_Pathway - Primary 1.4	0.736819	0.677861
NCI_Signaling_events_mediated_by_TCPTP_Pathway_(G1_S_transition_of_mitotic_cell_cycle) - NCI 1.2	0.699589	0.677562
NCI_Signaling_events_mediated_by_TCPTP_Pathway_(MAPKKK_cascade) - NCI 1.2	0.699589	0.677562
KEGG_p53_signaling_Main_Pathway - KEGG Adjusted 1.5	0.695623	0.677554
NCI_Integrins_in_angiogenesis_Main_Pathway - NCI 1.2	0.599367	0.67529
KEGG_Arachidonic_acid_metabolism_Main_Pathway - KEGG Adjusted 1.5	0.643249	0.674667
KEGG_RNA_transport_Main_Pathway - KEGG Adjusted 1.5	0.652867	0.674272
Akt_Signaling_Pathway - Primary 1.4	0.657683	0.673122
reactome_Insulin_processing_Main_Pathway - Reactome 1.3	0.701738	0.672087
D-imyoi-inositol_145-trisphosphate_degradation - Metabolism 1.4	0.655389	0.671078
FN1_Influence_on_Cell_Motility_via_Integrins - Cytoskeleton 1.2	0.584457	0.670823
reactome_Signaling_by_SCF_KIT_Main_Pathway - Reactome 1.3	0.646142	0.66726
NCI_Signaling_events_mediated_by_Stem_cell_factor_receptor_c_Kit__Main_Pathway - NCI 1.2	0.672082	0.665655
NCI_Endothelins_Main_Pathway - NCI 1.2	0.55021	0.664891
KEGG_Hepatitis_C_Main_Pathway - KEGG Adjusted 1.5	0.704352	0.663628
RANK_Signaling_in_Osteoclasts_Pathway_Inhibition_of_Death - Primary 1.4	0.6878	0.663487
FCGR3A-mediated_phagocytosis - Cytoskeleton 1.2	0.611964	0.663101
biocarta_nfkb_activation_by_nontypeable_hemophilus_influenzae_Main_Pathway - Biocarta 1.2	0.6753	0.662662
3-phosphoinositide_degradation - Metabolism 1.4	0.602877	0.662557
NCI_LKB1_signaling_events_Pathway_(establishment_of_cell_polarity) - NCI 1.2	0.694688	0.65781
reactome_IRF3_mediated_induction_of_type_I_IFN_Main_Pathway - Reactome 1.3	0.626075	0.657494
NCI_Notch_signaling_Pathway_(Bergmann_glial_cell_differentiation) - NCI 1.2	0.670435	0.657362
biocarta_regulation_of_bad_phosphorylation_Main_Pathway - Biocarta 1.2	0.644246	0.656151
reactome_RNA_Polymerase_III_Abortive_And_Retractive_Initiation_Main_Pathway - Reactome 1.3	0.630897	0.655721
chondroitin_sulfate_biosynthesis_late_stages - Metabolism 1.4	0.604855	0.655072
KEGG_Gastric_acid_secretion_Main_Pathway - KEGG Adjusted 1.5	0.676511	0.6548
reactome_Degradation_of_the_extracellular_matrix_Main_Pathway - Reactome 1.3	0.618147	0.654124
KEGG_Leukocyte_transendothelial_migration_Main_Pathway - KEGG Adjusted 1.5	0.634777	0.653413
reactome_Prolactin_receptor_signaling_Main_Pathway - Reactome 1.3	0.643211	0.651913
Akt_Signaling_Pathway_Glycogen_Synthesis_and_Apoptosis - Primary 1.4	0.664424	0.651167
ATM_Pathway_Cell_Survival - Primary 1.4	0.634067	0.65036
NCI_Signaling_events_mediated_by_VEGFR1_and_VEGFR2_Main_Pathway - NCI 1.2	0.557749	0.650009
cholesterol_biosynthesis_I - Metabolism 1.4	0.634741	0.648956
cholesterol_biosynthesis_II_via_2425-dihydrolanosterol - Metabolism 1.4	0.634741	0.648956
cholesterol_biosynthesis_III_via_desmosterol - Metabolism 1.4	0.634741	0.648956
reactome_Activation_of_Rac_Main_Pathway - Reactome 1.3	0.621454	0.648447
Akt_Signaling_Pathway_Cell_Cycle_Progression - Primary 1.4	0.639593	0.648298
reactome_p75NTR_recruits_signalling_complexes_Main_Pathway - Reactome 1.3	0.666622	0.647341
reactome_Activated_point_mutants_of_FGFR2_Main_Pathway - Reactome 1.3	0.41531	0.645868
CXC_Chemokine_Receptor_Pathway - Cytoskeleton 1.2	0.566435	0.644612
HGF_Pathway_Anoikis - Primary 1.4	0.618564	0.641874
reactome_snRNP_Assembly_Main_Pathway - Reactome 1.3	0.595142	0.641602
Akt_Signaling_Pathway_JNK_mediated_apoptosis - Primary 1.4	0.659739	0.640953
NCI_Nongenotropic_Androgen_signaling_Pathway_(cell_proliferation) - NCI 1.2	0.551781	0.640497
KEGG_Glycosaminoglycan_biosynthesis_keratan_sulfate_Main_Pathway - KEGG Adjusted 1.5	0.717861	0.639672
NCI_Notch_signaling_Pathway_(oligodendrocyte_development) - NCI 1.2	0.621122	0.639593
reactome_Interleukin_receptor_SHC_signaling_Main_Pathway - Reactome 1.3	0.64895	0.638829
Akt_Signaling_Pathway_Increased_GLUT4_translocation - Primary 1.4	0.669677	0.63768
TNF_Signaling_Pathway - Primary 1.4	0.617639	0.637031
Ras_Pathway_Gene_Expression_Cell_Proliferation_Cell_Survival_Differentiation_Development_Cell_Cycle_Control_Cell_Motility_Tumorigenesis_via_ELK4_ATF2_MEF2D_STAT2_CREB3_CCNA1_MYC_ELK1_JUN_CDK4 - Primary 1.4	0.688962	0.636943
gamma-linolenate_biosynthesis - Metabolism 1.4	0.497698	0.635311
NCI_Signaling_mediated_by_p38_alpha_and_p38_beta_Main_Pathway - NCI 1.2	0.397199	0.633994
D-imyoi-inositol-5-phosphate_metabolism - Metabolism 1.4	0.472153	0.631028
reactome_Synthesis_of_Leukotrienes_LT_and_Eoxins_EX__Main_Pathway - Reactome 1.3	0.526726	0.630748
KEGG_Bacterial_invasion_of_epithelial_cells_Main_Pathway - KEGG Adjusted 1.5	0.618968	0.629809
reactome_Synthesis_of_PIPs_at_the_Golgi_membrane_Main_Pathway - Reactome 1.3	0.627915	0.629677
bile_acid_biosynthesis_neutral_pathway - Metabolism 1.4	0.537712	0.629396
reactome_E2F_enabled_inhibition_of_pre_replication_complex_formation_Main_Pathway - Reactome 1.3	0.657758	0.628914
KEGG_Amino_sugar_and_nucleotide_sugar_metabolism_Main_Pathway - KEGG Adjusted 1.5	0.602266	0.627203
Akt_Signaling_Pathway_Induction_of_Chromatin_Condensation - Primary 1.4	0.653598	0.627176
KEGG_Axon_guidance_Main_Pathway - KEGG Adjusted 1.5	0.616583	0.626799
KEGG_Huntington_s_disease_Main_Pathway - KEGG Adjusted 1.5	0.469154	0.626799
Akt_Signaling_Pathway_AR_mediated_apoptosis - Primary 1.4	0.644852	0.626781
Akt_Signaling_Pathway_Blood_cell_differentiation - Primary 1.4	0.644852	0.626781
Akt_Signaling_Pathway_Elevation_of_Glucose_Import - Primary 1.4	0.644852	0.626781
Akt_Signaling_Pathway_Genetic_Stability - Primary 1.4	0.644852	0.626781
Akt_Signaling_Pathway_NF-kB_dependent_transciption - Primary 1.4	0.644852	0.626781
reactome_Synthesis_of_Prostaglandins_PG_and_Thromboxanes_TX__Main_Pathway - Reactome 1.3	0.510883	0.622885
NCI_ALK2_signaling_events_Main_Pathway - NCI 1.2	0.640206	0.622833
biocarta_map_kinase_inactivation_of_smrt_corepressor_Main_Pathway - Biocarta 1.2	0.646359	0.622315
KEGG_Gap_junction_Main_Pathway - KEGG Adjusted 1.5	0.640639	0.62077
Akt_Signaling_Pathway_Blocks_Apoptosis - Primary 1.4	0.628933	0.619656
biocarta_repression_of_pain_sensation_by_the_transcriptional_regulator_dream_Main_Pathway - Biocarta 1.2	0.642331	0.619007
NCI_Signaling_events_mediated_by_PTP1B_Main_Pathway - NCI 1.2	0.574846	0.618849
Chemotaxis_Driven_by_IL-8_and_LTB4 - Cytoskeleton 1.2	0.555327	0.617848
reactome_Interferon_alpha_beta_signaling_Main_Pathway - Reactome 1.3	0.616675	0.617568
reactome_EPHB_mediated_forward_signaling_Main_Pathway - Reactome 1.3	0.541281	0.617471
reactome_Signaling_by_ERBB2_Main_Pathway - Reactome 1.3	0.513472	0.617401
Calcium2+_Signaling - Cytoskeleton 1.2	0.592702	0.617243
reactome_Acetylcholine_regulates_insulin_secretion_Main_Pathway - Reactome 1.3	0.509724	0.616655
NCI_Endogenous_TLR_signaling_Main_Pathway - NCI 1.2	0.487348	0.615102
reactome_Striated_Muscle_Contraction_Main_Pathway - Reactome 1.3	0.47832	0.613645
Akt_Signaling_Pathway_Enhancement_of_Breast_Epithelial - Primary 1.4	0.636312	0.612092
NCI_Neurotrophic_factor_mediated_Trk_receptor_signaling_Pathway_(MAPKKK_cascade) - NCI 1.2	0.682015	0.610302
NCI_Signaling_events_mediated_by_focal_adhesion_kinase_Main_Pathway - NCI 1.2	0.508	0.609863
Akt_Signaling_Pathway_Acetylation_of_proteins - Primary 1.4	0.607533	0.609468
reactome_Synthesis_of_PIPs_at_the_plasma_membrane_Main_Pathway - Reactome 1.3	0.594512	0.608907
NCI_Signaling_events_mediated_by_VEGFR1_and_VEGFR2_Pathway_(focal_adhesion_assembly) - NCI 1.2	0.577291	0.60838
reactome_ECM_proteoglycans_Main_Pathway - Reactome 1.3	0.461152	0.608301
KEGG_Colorectal_cancer_Main_Pathway - KEGG Adjusted 1.5	0.597958	0.606125
reactome_Activation_of_Matrix_Metalloproteinases_Main_Pathway - Reactome 1.3	0.576388	0.605976
NCI_Aurora_A_signaling_Pathway_(centrosome_duplication) - NCI 1.2	0.599948	0.60559
Akt_Signaling_Pathway_Cell_Survival - Primary 1.4	0.622402	0.6043
KEGG_Tyrosine_metabolism_Main_Pathway - KEGG Adjusted 1.5	0.621394	0.602817
TGF-Beta_Pathway_Post_Transciptional_G1_Arrest - Primary 1.4	0.602616	0.602685
Ras_Pathway_Apoptosis - Primary 1.4	0.609992	0.602562
biocarta_insulin_signaling_Main_Pathway - Biocarta 1.2	0.581421	0.602027
NCI_EPHA_forward_signaling_Main_Pathway - NCI 1.2	0.524835	0.601825
KEGG_Pertussis_Main_Pathway - KEGG Adjusted 1.5	0.61487	0.601185
NCI_ALK1_signaling_events_Pathway_(endothelial_cell_proliferation) - NCI 1.2	0.614369	0.601027
NCI_Ephrin_B_reverse_signaling_Pathway_(cell_adhesion) - NCI 1.2	0.624394	0.600781
biocarta_mechanism_of_protein_import_into_the_nucleus_Main_Pathway - Biocarta 1.2	0.560298	0.600746
biocarta_mapkinase_signaling_Main_Pathway - Biocarta 1.2	0.614933	0.600272
reactome_Downstream_signal_transduction_Main_Pathway - Reactome 1.3	0.592122	0.599596
NCI_Beta3_integrin_cell_surface_interactions_Main_Pathway - NCI 1.2	0.576979	0.599517
biocarta_influence_of_ras_and_rho_proteins_on_g1_to_s_transition_Main_Pathway - Biocarta 1.2	0.622963	0.599386
HGF_Pathway_Cell_Cycle_Progression - Primary 1.4	0.52812	0.596455
KEGG_Neurotrophin_signaling_Main_Pathway - KEGG Adjusted 1.5	0.653162	0.59513
NCI_ErbB1_downstream_signaling_Main_Pathway - NCI 1.2	0.559582	0.594805
NCI_Neurotrophic_factor_mediated_Trk_receptor_signaling_Pathway_(neuron_projection_morphogenesis) - NCI 1.2	0.531385	0.594735
reactome_Downregulation_of_TGF_beta_receptor_signaling_Main_Pathway - Reactome 1.3	0.583893	0.593936
reactome_RIG_I_MDA5_mediated_induction_of_IFN_alpha_beta_pathways_Main_Pathway - Reactome 1.3	0.60456	0.593822
Extracellular_Matrix_Remodeling_during_Adhesion - Cytoskeleton 1.2	0.540231	0.593015
NCI_Nongenotropic_Androgen_signaling_Main_Pathway - NCI 1.2	0.489393	0.593015
KEGG_Insulin_secretion_Main_Pathway - KEGG Adjusted 1.5	0.545322	0.591479
TRAF_Pathway_Direct_Antimicrobial_Response_and_Cell-Mediated_Immunity_and_Apoptosis_of_Host_Cell - Primary 1.4	0.550518	0.591286
reactome_APC_C_Cdc20_mediated_degradation_of_Securin_Main_Pathway - Reactome 1.3	0.577452	0.589119
reactome_APC_C_Cdh1_mediated_degradation_of_Cdc20_and_other_APC_C_Cdh1_targeted_proteins_in_late_mitosis_early_G1_Main_Pathway - Reactome 1.3	0.577452	0.589119
KEGG_Peroxisome_Main_Pathway - KEGG Adjusted 1.5	0.567344	0.588645
NCI_Signaling_events_mediated_by_VEGFR1_and_VEGFR2_Pathway_(angiogenesis) - NCI 1.2	0.545329	0.588619
CCR3_Pathway_in_Eosinophils - Cytoskeleton 1.2	0.53012	0.587706
Akt_Signaling_Pathway_Apoptosis - Primary 1.4	0.650826	0.58711
D-imyoi-inositol_145-trisphosphate_biosynthesis - Metabolism 1.4	0.454283	0.586969
IL-2_Pathway_Apoptosis_Inhibition - Primary 1.4	0.566302	0.585381
NCI_LPA_receptor_mediated_events_Main_Pathway - NCI 1.2	0.495788	0.583143
NCI_Signaling_events_mediated_by_VEGFR1_and_VEGFR2_Pathway_(regulation_of_vascular_permeability) - NCI 1.2	0.524666	0.58259
KEGG_Adipocytokine_signaling_Main_Pathway - KEGG Adjusted 1.5	0.507806	0.581537
NCI_Signaling_events_mediated_by_Hepatocyte_Growth_Factor_Receptor_c_Met__Pathway_(positive_regulation_of_tyrosine_phosphorylation_of_STAT_protein) - NCI 1.2	0.572744	0.581099
KEGG_Tight_junction_Main_Pathway - KEGG Adjusted 1.5	0.391513	0.580713
KEGG_Aldosterone_regulated_sodium_reabsorption_Main_Pathway - KEGG Adjusted 1.5	0.564859	0.578115
NCI_BARD1_signaling_events_Main_Pathway - NCI 1.2	0.616701	0.577887
reactome_RNA_Polymerase_III_Transcription_Initiation_From_Type_1_Promoter_Main_Pathway - Reactome 1.3	0.575959	0.577694
reactome_RNA_Polymerase_III_Transcription_Initiation_From_Type_2_Promoter_Main_Pathway - Reactome 1.3	0.575959	0.577694
reactome_RNA_Polymerase_III_Transcription_Termination_Main_Pathway - Reactome 1.3	0.592512	0.577053
NCI_Signaling_events_mediated_by_PRL_Main_Pathway - NCI 1.2	0.607665	0.575281
reactome_ABC_family_proteins_mediated_transport_Main_Pathway - Reactome 1.3	0.635507	0.575105
NCI_Ephrin_B_reverse_signaling_Pathway_(angiogenesis) - NCI 1.2	0.600673	0.574956
NCI_Ephrin_B_reverse_signaling_Pathway_(endothelial_cell_migration) - NCI 1.2	0.600673	0.574956
reactome_RMTs_methylate_histone_arginines_Main_Pathway - Reactome 1.3	0.612334	0.573956
NCI_Ephrin_B_reverse_signaling_Main_Pathway - NCI 1.2	0.602745	0.573815
biocarta_hiv_1_nef_negative_effector_of_fas_and_tnf_Pathway_(Pathway_protein_ubiquitination_of_CHUK) - Biocarta 1.2	0.560934	0.573298
biocarta_mcalpain_and_friends_in_cell_motility_Main_Pathway - Biocarta 1.2	0.514464	0.57228
NCI_Nongenotropic_Androgen_signaling_Pathway_(apoptosis) - NCI 1.2	0.503769	0.571894
reactome_Activation_of_IRF3_IRF7_mediated_by_TBK1_IKK_epsilon_Main_Pathway - Reactome 1.3	0.644677	0.571192
Cytoskeleton_Reorganization - Cytoskeleton 1.2	0.490819	0.569919
fatty_acid_beta-oxidation_peroxisome - Metabolism 1.4	0.467942	0.568568
KEGG_Endocytosis_Main_Pathway - KEGG Adjusted 1.5	0.434938	0.56719
D-imyoi-inositol_134-trisphosphate_biosynthesis - Metabolism 1.4	0.531516	0.566822
KEGG_Chronic_myeloid_leukemia_Main_Pathway - KEGG Adjusted 1.5	0.597283	0.566787
reactome_EGFR_downregulation_Main_Pathway - Reactome 1.3	0.555612	0.565128
VEGF_Pathway - Primary 1.4	0.530223	0.563847
reactome_Integrin_cell_surface_interactions_Main_Pathway - Reactome 1.3	0.530733	0.562004
TRAF_Pathway_Gene_Expression_via_FOS_JUN - Primary 1.4	0.559469	0.560846
heparan_sulfate_biosynthesis_late_stages - Metabolism 1.4	0.513036	0.560363
TNF_Signaling_Pathway_Gene_Expression_and_Cell_Survival_via_FOS_NFKB2_JUN_ELK1_ATF6 - Primary 1.4	0.536989	0.559872
NCI_Integrins_in_angiogenesis_Pathway_(angiogenesis) - NCI 1.2	0.578683	0.559846
CDP-diacylglycerol_biosynthesis - Metabolism 1.4	0.496508	0.559784
NCI_ErbB1_downstream_signaling_Pathway_(ruffle_organization) - NCI 1.2	0.535253	0.55974
Akt_Signaling_Pathway_NF-kB_pathway - Primary 1.4	0.553658	0.559591
NCI_E_cadherin_signaling_in_keratinocytes_Main_Pathway - NCI 1.2	0.531587	0.557073
reactome_DARPP_32_events_Main_Pathway - Reactome 1.3	0.459541	0.55652
Akt_Signaling_Pathway_ERK_mediated_apoptosis - Primary 1.4	0.646089	0.556511
reactome_ADP_signalling_through_P2Y_purinoceptor_1_Main_Pathway - Reactome 1.3	0.334401	0.556502
reactome_Hormone_sensitive_lipase_HSL_mediated_triacylglycerol_hydrolysis_Main_Pathway - Reactome 1.3	0.527456	0.555318
KEGG_Transcriptional_misregulation_in_cancer_Main_Pathway - KEGG Adjusted 1.5	0.519006	0.554932
Akt_Signaling_Pathway_Aggregation_and_Neurodegeneration - Primary 1.4	0.585142	0.552589
NCI_Signaling_events_mediated_by_focal_adhesion_kinase_Pathway_(negative_regulation_of_cell_adhesion_involved_in_substrate_bound_cell_migration) - NCI 1.2	0.505003	0.552554
KEGG_Acute_myeloid_leukemia_Main_Pathway - KEGG Adjusted 1.5	0.61245	0.55165
glutathione-mediated_detoxification - Metabolism 1.4	0.523332	0.551351
reactome_A_tetrasaccharide_linker_sequence_is_required_for_GAG_synthesis_Main_Pathway - Reactome 1.3	0.565628	0.551176
NCI_E_cadherin_signaling_in_the_nascent_adherens_junction_Main_Pathway - NCI 1.2	0.489802	0.550992
IGF1R_Signaling_Pathway_Protein_Synthesis - Primary 1.4	0.501033	0.550913
biocarta_role_of_erbb2_in_signal_transduction_and_oncology_Main_Pathway - Biocarta 1.2	0.506891	0.550123
KEGG_Morphine_addiction_Main_Pathway - KEGG Adjusted 1.5	0.555227	0.54971
TGF-Beta_Pathway_Epithelial_Mesenchymal_Transdifferentiation - Primary 1.4	0.544926	0.549105
KEGG_Wnt_signaling_Main_Pathway - KEGG Adjusted 1.5	0.551861	0.546727
reactome_Signaling_by_BMP_Main_Pathway - Reactome 1.3	0.51243	0.545472
IL-10_Pathway_IL-10_Responsive_Genes_Transcription_of_BCLXL_Cyclin-D1_D2_D3_Pim1_c-Myc_and_P19(INK4D)_via_STAT3 - Primary 1.4	0.581225	0.545139
IL-10_Pathway_Inflammatory_Cytokine_Genes_Expression_via_STAT3 - Primary 1.4	0.581225	0.545139
biocarta_hypoxia_inducible_factor_in_the_cardivascular_system_Main_Pathway - Biocarta 1.2	0.538013	0.545042
reactome_Prefoldin_mediated_transfer_of_substrate_to_CCT_TriC_Main_Pathway - Reactome 1.3	0.464468	0.544191
KEGG_Renin_angiotensin_system_Main_Pathway - KEGG Adjusted 1.5	0.521268	0.543401
Akt_Signaling_Pathway_NFAT_degradation - Primary 1.4	0.579373	0.541778
KEGG_Endometrial_cancer_Main_Pathway - KEGG Adjusted 1.5	0.627395	0.541286
KEGG_Ubiquitin_mediated_proteolysis_Main_Pathway - KEGG Adjusted 1.5	0.496439	0.54069
HIF1Alpha_Pathway_NOS_Pathway - Primary 1.4	0.509664	0.540181
HIF1Alpha_Pathway_VEGF_Pathway - Primary 1.4	0.509664	0.540181
SMAD_Signaling_Network_Pathway - Primary 1.4	0.518301	0.539259
TRAF_Pathway_Cell_Survival - Primary 1.4	0.566495	0.538935
biocarta_keratinocyte_differentiation_Pathway_(apoptosis) - Biocarta 1.2	0.547094	0.537829
NCI_Neurotrophic_factor_mediated_Trk_receptor_signaling_Main_Pathway - NCI 1.2	0.433931	0.537583
1D-imyoi-inositol_hexakisphosphate_biosynthesis_II_mammalian - Metabolism 1.4	0.553727	0.537425
reactome_Ion_transport_by_P_type_ATPases_Main_Pathway - Reactome 1.3	0.584949	0.536232
NCI_LKB1_signaling_events_Main_Pathway - NCI 1.2	0.574177	0.534029
UTP_and_CTP_ide_novoi_biosynthesis - Metabolism 1.4	0.500082	0.532933
NCI_Internalization_of_ErbB1_Main_Pathway - NCI 1.2	0.513965	0.532011
NCI_EPHA_forward_signaling_Pathway_(proteasomal_ubiquitin_dependent_protein_catabolic_process) - NCI 1.2	0.466054	0.531713
Ras_Pathway_Cell-Cell_Junctions - Primary 1.4	0.454311	0.531283
Akt_Pathway_Regulation_by_GH - Cytoskeleton 1.2	0.513714	0.528905
biocarta_regulators_of_bone_mineralization_Main_Pathway - Biocarta 1.2	0.409041	0.5288
Chemotaxis_Driven_by_C5a - Cytoskeleton 1.2	0.419985	0.527606
Chemotaxis_Driven_by_CCL2 - Cytoskeleton 1.2	0.456506	0.527238
reactome_Initial_triggering_of_complement_Main_Pathway - Reactome 1.3	0.544103	0.526255
HIF1Alpha_Pathway - Primary 1.4	0.510984	0.524623
HMGB1_signaling_through_RAGE - Cytoskeleton 1.2	0.436291	0.524491
NCI_Arf1_Main_Pathway - NCI 1.2	0.483809	0.523219
reactome_Depolymerisation_of_the_Nuclear_Lamina_Main_Pathway - Reactome 1.3	0.531949	0.522745
NCI_LPA_receptor_mediated_events_Pathway_(cAMP_biosynthetic_process) - NCI 1.2	0.506069	0.522218
KEGG_Bladder_cancer_Main_Pathway - KEGG Adjusted 1.5	0.549935	0.52192
NCI_Nephrin_Neph1_signaling_in_the_kidney_podocyte_Main_Pathway - NCI 1.2	0.564824	0.519963
reactome_Synthesis_of_very_long_chain_fatty_acyl_CoAs_Main_Pathway - Reactome 1.3	0.480279	0.519217
Cell_Adhesion_Regulated_by_CDHs - Cytoskeleton 1.2	0.487467	0.518313
CMP_phosphorylation - Metabolism 1.4	0.515388	0.517743
HIF1Alpha_Pathway_Gene_Expression_via_JUN_CREB3 - Primary 1.4	0.511068	0.516848
reactome_Keratan_sulfate_biosynthesis_Main_Pathway - Reactome 1.3	0.417917	0.516664
heparan_sulfate_biosynthesis - Metabolism 1.4	0.460861	0.514768
guanosine_nucleotides_ide_novoi_biosynthesis - Metabolism 1.4	0.597522	0.5139
NCI_Signaling_events_regulated_by_Ret_tyrosine_kinase_Pathway_(lamellipodium_assembly) - NCI 1.2	0.444989	0.51368
reactome_Activation_of_PPARGC1A_PGC_1alpha_by_phosphorylation_Main_Pathway - Reactome 1.3	0.485943	0.513417
HIF1Alpha_Pathway_p53_Hypoxia_Pathway - Primary 1.4	0.5029	0.513224
biocarta_stathmin_and_breast_cancer_resistance_to_antimicrotubule_agents_Main_Pathway - Biocarta 1.2	0.554316	0.512724
reactome_DNA_Damage_Telomere_Stress_Induced_Senescence_Main_Pathway - Reactome 1.3	0.554685	0.512566
biocarta_il_4_signaling_Main_Pathway - Biocarta 1.2	0.511186	0.512294
Ubiquitin-Proteasome_Dependent_Proteolysis_Pathway - Primary 1.4	0.507087	0.50996
reactome_IRAK1_recruits_IKK_complex_Main_Pathway - Reactome 1.3	0.530663	0.50874
reactome_IRAK1_recruits_IKK_complex_upon_TLR7_8_or_9_stimulation_Main_Pathway - Reactome 1.3	0.530663	0.50874
NCI_Endogenous_TLR_signaling_Pathway_(regulation_of_apoptosis) - NCI 1.2	0.370198	0.508222
NCI_Endogenous_TLR_signaling_Pathway_(regulation_of_cell_proliferation) - NCI 1.2	0.370198	0.508222
NCI_Endogenous_TLR_signaling_Pathway_(regulation_of_interleukin_1_beta_production) - NCI 1.2	0.370198	0.508222
reactome_Processing_of_Intronless_Pre_mRNAs_Main_Pathway - Reactome 1.3	0.518657	0.508003
reactome_EPHA_mediated_growth_cone_collapse_Main_Pathway - Reactome 1.3	0.398851	0.506748
KEGG_Pentose_phosphate_Main_Pathway - KEGG Adjusted 1.5	0.524364	0.506406
3-phosphoinositide_biosynthesis - Metabolism 1.4	0.529958	0.50251
KEGG_Glyoxylate_and_dicarboxylate_metabolism_Main_Pathway - KEGG Adjusted 1.5	0.492954	0.502282
reactome_Signaling_by_FGFR_mutants_Main_Pathway - Reactome 1.3	0.362925	0.502185
KEGG_Selenocompound_metabolism_Main_Pathway - KEGG Adjusted 1.5	0.363304	0.501676
NCI_Nectin_adhesion_Main_Pathway - NCI 1.2	0.462157	0.501623
biocarta_integrin_signaling_Main_Pathway - Biocarta 1.2	0.448938	0.500114
reactome_KSRP_destabilizes_mRNA_Main_Pathway - Reactome 1.3	0.558193	0.499965
NCI_EPHA_forward_signaling_Pathway_(axon_guidance) - NCI 1.2	0.391381	0.498649
reactome_DCC_mediated_attractive_signaling_Main_Pathway - Reactome 1.3	0.256853	0.496999
NCI_LKB1_signaling_events_Pathway_(Pathway_positive_regulation_of_CREB_transcription_factor_activity_via_CRTC2) - NCI 1.2	0.543083	0.496657
biocarta_rho_selective_guanine_exchange_factor_akap13_mediates_stress_fiber_formation_Main_Pathway - Biocarta 1.2	0.514326	0.495332
NCI_N_cadherin_signaling_events_Main_Pathway - NCI 1.2	0.483151	0.494559
reactome_Post_chaperonin_tubulin_folding_Main_Pathway - Reactome 1.3	0.328336	0.494533
NCI_Lissencephaly_gene_LIS1_in_neuronal_migration_and_development_Main_Pathway - NCI 1.2	0.513583	0.49355
Ephrin-B_Pathway - Cytoskeleton 1.2	0.412636	0.493506
KEGG_Protein_export_Main_Pathway - KEGG Adjusted 1.5	0.418838	0.493305
reactome_Signaling_by_Hippo_Main_Pathway - Reactome 1.3	0.444718	0.492181
CD16_Pathway_in_Natural_Killer_cells - Cytoskeleton 1.2	0.440492	0.491541
NCI_Signaling_events_regulated_by_Ret_tyrosine_kinase_Main_Pathway - NCI 1.2	0.465077	0.491058
ATM_Pathway - Primary 1.4	0.552122	0.49076
CDC42_Pathway - Cytoskeleton 1.2	0.378133	0.490383
KEGG_Collecting_duct_acid_secretion_Main_Pathway - KEGG Adjusted 1.5	0.485996	0.49004
reactome_Presynaptic_function_of_Kainate_receptors_Main_Pathway - Reactome 1.3	0.326385	0.48933
NCI_Notch_mediated_HES_HEY_network_Main_Pathway - NCI 1.2	0.470581	0.486837
KEGG_Glutamatergic_synapse_Main_Pathway - KEGG Adjusted 1.5	0.581765	0.486688
reactome_EPH_ephrin_mediated_repulsion_of_cells_Main_Pathway - Reactome 1.3	0.417598	0.484977
IGF1R_Signaling_Pathway_Cell_Survival - Primary 1.4	0.461446	0.484582
Chemokine_Ligand_2_Signaling - Cytoskeleton 1.2	0.379578	0.484451
NCI_Netrin_mediated_signaling_events_Main_Pathway - NCI 1.2	0.473802	0.483907
NCI_ErbB2_ErbB3_signaling_events_Main_Pathway - NCI 1.2	0.516144	0.48374
KEGG_Glycosphingolipid_biosynthesis_ganglio_series_Main_Pathway - KEGG Adjusted 1.5	0.52388	0.482538
KEGG_Lysosome_Main_Pathway - KEGG Adjusted 1.5	0.420524	0.481002
KEGG_Fanconi_anemia_Main_Pathway - KEGG Adjusted 1.5	0.495162	0.480423
reactome_Interaction_With_The_Zona_Pellucida_Main_Pathway - Reactome 1.3	0.489198	0.479736
KEGG_Dilated_cardiomyopathy_Main_Pathway - KEGG Adjusted 1.5	0.487703	0.479379
KEGG_Hypertrophic_cardiomyopathy_HCM__Main_Pathway - KEGG Adjusted 1.5	0.487703	0.479379
reactome_Signaling_by_constitutively_active_EGFR_Main_Pathway - Reactome 1.3	0.559149	0.478598
biocarta_role_of_erk5_in_neuronal_survival_Pathway_(cell_survival) - Biocarta 1.2	0.500596	0.477992
NCI_Endothelins_Pathway_(cAMP_biosynthetic_process) - NCI 1.2	0.462045	0.47751
NCI_CD40_CD40L_signaling_Main_Pathway - NCI 1.2	0.491133	0.477106
KEGG_Glycerophospholipid_metabolism_Main_Pathway - KEGG Adjusted 1.5	0.348669	0.476518
ICOS_signaling_in_T-helper_cells - Cytoskeleton 1.2	0.501615	0.472596
biocarta_role_of_pi3k_subunit_p85_in_regulation_of_actin_organization_and_cell_migration_Main_Pathway - Biocarta 1.2	0.424036	0.472473
KEGG_Phagosome_Main_Pathway - KEGG Adjusted 1.5	0.322072	0.472227
NCI_ErbB2_ErbB3_signaling_events_Pathway_(myelination) - NCI 1.2	0.441367	0.469998
NCI_BARD1_signaling_events_Pathway_(DNA_repair) - NCI 1.2	0.479882	0.469796
KEGG_Pantothenate_and_CoA_biosynthesis_Main_Pathway - KEGG Adjusted 1.5	0.587021	0.468857
NCI_Signaling_events_mediated_by_focal_adhesion_kinase_Pathway_(cell_migration) - NCI 1.2	0.277749	0.468103
reactome_RNA_Polymerase_III_Chain_Elongation_Main_Pathway - Reactome 1.3	0.504869	0.467708
RANK_Signaling_in_Osteoclasts_Pathway_Resorption - Primary 1.4	0.468507	0.466286
KEGG_Regulation_of_lipolysis_in_adipocytes_Main_Pathway - KEGG Adjusted 1.5	0.500338	0.465944
reactome_regulation_of_FZD_by_ubiquitination_Main_Pathway - Reactome 1.3	0.495578	0.465593
chondroitin_sulfate_biosynthesis - Metabolism 1.4	0.44729	0.463615
dermatan_sulfate_biosynthesis - Metabolism 1.4	0.44729	0.463615
NCI_E_cadherin_signaling_in_keratinocytes_Pathway_(adherens_junction_organization) - NCI 1.2	0.510353	0.462259
reactome_Activation_of_NF_kappaB_in_B_cells_Main_Pathway - Reactome 1.3	0.466205	0.457371
biocarta_melanocyte_development_and_pigmentation_Main_Pathway - Biocarta 1.2	0.497463	0.456748
reactome_RNA_Polymerase_III_Transcription_Initiation_From_Type_3_Promoter_Main_Pathway - Reactome 1.3	0.474646	0.452782
reactome_pre_mRNA_splicing_Main_Pathway - Reactome 1.3	0.450128	0.44943
IGF1R_Signaling_Pathway_Cell_Proliferation_Diferentiation_and_Apoptosis - Primary 1.4	0.397788	0.449351
reactome_Deposition_of_new_CENPA_containing_nucleosomes_at_the_centromere_Main_Pathway - Reactome 1.3	0.470993	0.448719
reactome_Insulin_receptor_recycling_Main_Pathway - Reactome 1.3	0.463516	0.446665
reactome_Deadenylation_of_mRNA_Main_Pathway - Reactome 1.3	0.451274	0.446402
biocarta_proteasome_complex_Pathway_(Pathway_degradation_of_PSMA1) - Biocarta 1.2	0.466945	0.445981
adenosine_deoxyribonucleotides_ide_novoi_biosynthesis - Metabolism 1.4	0.469614	0.445384
KEGG_Type_I_diabetes_mellitus_Main_Pathway - KEGG Adjusted 1.5	0.489939	0.441953
NCI_Neurotrophic_factor_mediated_Trk_receptor_signaling_Pathway_(Schwann_cell_development) - NCI 1.2	0.405433	0.440856
NCI_E_cadherin_signaling_in_keratinocytes_Pathway_(apoptosis) - NCI 1.2	0.419918	0.440602
NCI_E_cadherin_signaling_in_the_nascent_adherens_junction_Pathway_(regulation_of_actin_nucleation) - NCI 1.2	0.385032	0.440558
Gamma-Aminobutyric_Acid_A_Receptor_Pathway - Cytoskeleton 1.2	0.432893	0.439426
NCI_Beta2_integrin_cell_surface_interactions_Main_Pathway - NCI 1.2	0.416928	0.43897
reactome_repression_of_WNT_target_genes_Main_Pathway - Reactome 1.3	0.456523	0.438786
biocarta_inactivation_of_gsk3_by_akt_causes_accumulation_of_b_catenin_in_alveolar_macrophages_Main_Pathway - Biocarta 1.2	0.458148	0.438119
reactome_RIP_mediated_NFkB_activation_via_ZBP1_Main_Pathway - Reactome 1.3	0.465576	0.437346
reactome_Signaling_by_NOTCH4_Main_Pathway - Reactome 1.3	0.496041	0.437303
reactome_ABCA_transporters_in_lipid_homeostasis_Main_Pathway - Reactome 1.3	0.39797	0.437083
reactome_temp_Nuclear_Receptor_transcription_pathway - Reactome 1.3	0.469261	0.437074
NCI_Arf6_trafficking_events_Pathway_(calcium_ion_dependent_exocytosis) - NCI 1.2	0.468494	0.437039
NCI_Sphingosine_1_phosphate_S1P_Main_Pathway - NCI 1.2	0.409679	0.431037
AHR_Pathway - Primary 1.4	0.480669	0.430195
KEGG_Pathogenic_Escherichia_coli_infection_Main_Pathway - KEGG Adjusted 1.5	0.26465	0.429914
IL-10_Pathway_Translational_Modulation - Primary 1.4	0.446714	0.429598
reactome_Detoxification_of_Reactive_Oxygen_Species_Main_Pathway - Reactome 1.3	0.524824	0.429396
reactome_Dual_incision_reaction_in_GG_NER_Main_Pathway - Reactome 1.3	0.422082	0.425386
KEGG_RNA_polymerase_Main_Pathway - KEGG Adjusted 1.5	0.44874	0.422139
NCI_ALK1_signaling_events_Main_Pathway - NCI 1.2	0.379332	0.421341
reactome_Platelet_sensitization_by_LDL_Main_Pathway - Reactome 1.3	0.378333	0.421332
NCI_N_cadherin_signaling_events_Pathway_(regulation_of_cell_cell_adhesion) - NCI 1.2	0.41276	0.419586
FAK_Pathway - Cytoskeleton 1.2	0.350203	0.419366
NCI_Signaling_mediated_by_p38_gamma_and_p38_delta_Main_Pathway - NCI 1.2	0.503504	0.416365
NCI_Signaling_events_mediated_by_Hepatocyte_Growth_Factor_Receptor_c_Met__Main_Pathway - NCI 1.2	0.410523	0.415374
NCI_ATM_Main_Pathway - NCI 1.2	0.485732	0.414716
KEGG_Spliceosome_Main_Pathway - KEGG Adjusted 1.5	0.436197	0.414075
KEGG_Nicotinate_and_nicotinamide_metabolism_Main_Pathway - KEGG Adjusted 1.5	0.478042	0.413794
KEGG_Salivary_secretion_Main_Pathway - KEGG Adjusted 1.5	0.554391	0.405686
biocarta_skeletal_muscle_hypertrophy_is_regulated_via_akt_mtor_Main_Pathway - Biocarta 1.2	0.42308	0.405441
NCI_EPHA_forward_signaling_Pathway_(cell_cell_adhesion) - NCI 1.2	0.328053	0.405309
NCI_EPHA_forward_signaling_Pathway_(regulation_of_stress_fiber_assembly) - NCI 1.2	0.328053	0.405309
reactome_Activation_of_G_protein_gated_Potassium_channels_Main_Pathway - Reactome 1.3	0.388611	0.404361
reactome_Inhibition_of_voltage_gated_Ca2_channels_via_Gbeta_gamma_subunits_Main_Pathway - Reactome 1.3	0.388611	0.404361
NCI_Arf6_trafficking_events_Pathway_(clathrin_coat_assembly) - NCI 1.2	0.437951	0.402571
reactome_E2F_mediated_regulation_of_DNA_replication_Main_Pathway - Reactome 1.3	0.590188	0.402447
reactome_Sphingolipid_de_novo_biosynthesis_Main_Pathway - Reactome 1.3	0.219261	0.401246
NCI_AP_1_transcription_factor_network_Main_Pathway - NCI 1.2	0.392321	0.400614
NCI_Notch_signaling_Main_Pathway - NCI 1.2	0.486259	0.400105
KEGG_Basal_transcription_factors_Main_Pathway - KEGG Adjusted 1.5	0.360813	0.398912
biocarta_how_does_salmonella_hijack_a_cell_Pathway_(lamellipodium_assembly) - Biocarta 1.2	0.330515	0.398614
KEGG_TNF_signaling_Main_Pathway - KEGG Adjusted 1.5	0.443421	0.397262
reactome_Signaling_by_NOTCH3_Main_Pathway - Reactome 1.3	0.434604	0.396762
reactome_Synthesis_of_glycosylphosphatidylinositol_GPI__Main_Pathway - Reactome 1.3	0.391805	0.396437
reactome_Activation_of_the_AP_1_family_of_transcription_factors_Main_Pathway - Reactome 1.3	0.46043	0.385223
reactome_Synthesis_of_PC_Main_Pathway - Reactome 1.3	0.0395799	0.385144
NCI_Signaling_events_mediated_by_HDAC_Class_I_Main_Pathway - NCI 1.2	0.332733	0.384047
reactome_temp_Post-translational_modification_synthesis_of_GPI-anchored_proteins - Reactome 1.3	0.453489	0.383854
reactome_Degradation_of_beta_catenin_by_the_destruction_complex_Main_Pathway - Reactome 1.3	0.359588	0.382889
reactome_Hyaluronan_uptake_and_degradation_Main_Pathway - Reactome 1.3	0.428645	0.382248
KEGG_Arginine_and_proline_metabolism_Main_Pathway - KEGG Adjusted 1.5	0.406321	0.380897
reactome_ERK_MAPK_targets_Main_Pathway - Reactome 1.3	0.4148	0.379414
reactome_ADP_signalling_through_P2Y_purinoceptor_12_Main_Pathway - Reactome 1.3	0.344154	0.375956
KEGG_Alcoholism_Main_Pathway - KEGG Adjusted 1.5	0.342637	0.375184
KEGG_Protein_processing_in_endoplasmic_reticulum_Main_Pathway - KEGG Adjusted 1.5	0.360413	0.374316
KEGG_Glycosphingolipid_biosynthesis_globo_series_Main_Pathway - KEGG Adjusted 1.5	0.385325	0.373447
NCI_Signaling_events_mediated_by_HDAC_Class_I_Pathway_(histone_deacetylation) - NCI 1.2	0.290314	0.372052
reactome_Synthesis_secretion_and_inactivation_of_Glucagon_like_Peptide_1_GLP_1__Main_Pathway - Reactome 1.3	0.35634	0.37063
reactome_Synthesis_secretion_and_inactivation_of_Glucose_dependent_Insulinotropic_Polypeptide_GIP__Main_Pathway - Reactome 1.3	0.35634	0.37063
NCI_E_cadherin_signaling_in_keratinocytes_Pathway_(keratinocyte_differentiation) - NCI 1.2	0.358069	0.366216
reactome_Polo_like_kinase_mediated_events_Main_Pathway - Reactome 1.3	0.367421	0.365821
reactome_Prostacyclin_signalling_through_prostacyclin_receptor_Main_Pathway - Reactome 1.3	0.30493	0.365804
NCI_EPHA2_forward_signaling_Main_Pathway - NCI 1.2	0.278528	0.358959
KEGG_Pancreatic_cancer_Main_Pathway - KEGG Adjusted 1.5	0.440725	0.355914
reactome_Integrin_alphaIIb_beta3_signaling_Main_Pathway - Reactome 1.3	0.3346	0.353615
NCI_N_cadherin_signaling_events_Pathway_(actin_filament_polymerization) - NCI 1.2	0.375318	0.350448
TCA_cycle - Metabolism 1.4	0.350152	0.34907
reactome_Pre_NOTCH_Processing_in_Golgi_Main_Pathway - Reactome 1.3	0.355686	0.347885
reactome_Interleukin_1_signaling_Main_Pathway - Reactome 1.3	0.383796	0.343542
Hedgehog_Signaling_in_Mammals_no_Tubulin_Pathway - Primary 1.4	0.278533	0.343506
reactome_Processing_of_Capped_Intron_Containing_Pre_mRNA_Main_Pathway - Reactome 1.3	0.327087	0.343024
biocarta_lissencephaly_gene_lis1_in_neuronal_migration_and_development_Main_Pathway - Biocarta 1.2	0.290386	0.336618
KEGG_GABAergic_synapse_Main_Pathway - KEGG Adjusted 1.5	0.306209	0.331888
biocarta_mets_affect_on_macrophage_differentiation_Main_Pathway - Biocarta 1.2	0.356218	0.328387
Hedgehog_Signaling_in_Mammals_Pathway - Primary 1.4	0.25526	0.327299
reactome_IRAK2_mediated_activation_of_TAK1_complex_Main_Pathway - Reactome 1.3	0.290202	0.327159
reactome_IRAK2_mediated_activation_of_TAK1_complex_upon_TLR7_8_or_9_stimulation_Main_Pathway - Reactome 1.3	0.290202	0.327159
KEGG_Sphingolipid_metabolism_Main_Pathway - KEGG Adjusted 1.5	0.198133	0.325667
biocarta_mechanisms_of_transcriptional_repression_by_dna_methylation_Main_Pathway - Biocarta 1.2	0.249705	0.31805
biocarta_mechanisms_of_transcriptional_repression_by_dna_methylation_Pathway_(histone_deacetylation) - Biocarta 1.2	0.249705	0.31805
Ras_Pathway_Golgi_Trafficking_and_Vesicle_Formation - Primary 1.4	0.30723	0.312434
reactome_Iron_uptake_and_transport_Main_Pathway - Reactome 1.3	0.225406	0.309161
biocarta_lissencephaly_gene_lis1_in_neuronal_migration_and_development_Pathway_(retrograde_axon_cargo_transport) - Biocarta 1.2	0.255928	0.308345
reactome_Activated_NOTCH1_Transmits_Signal_to_the_Nucleus_Main_Pathway - Reactome 1.3	0.327126	0.297841
reactome_RNA_Polymerase_II_Pre_transcription_Events_Main_Pathway - Reactome 1.3	0.285943	0.29019
CDK5_Pathway_in_Central_Nervous_System - Cytoskeleton 1.2	0.330387	0.280256
HGF_Pathway_Regulation_of_Cytoskeleton_Cell_Polarity_and_Cell_Motility - Primary 1.4	0.248682	0.278984
reactome_AKT_phosphorylates_targets_in_the_cytosol_Main_Pathway - Reactome 1.3	0.285833	0.278808
Angiotensin-PTK2B_Pathway - Cytoskeleton 1.2	0.266656	0.277027
reactome_RNA_Polymerase_II_Transcription_Elongation_Main_Pathway - Reactome 1.3	0.258794	0.274754
biocarta_multi_step_regulation_of_transcription_by_pitx2_Main_Pathway - Biocarta 1.2	0.289693	0.271753
KEGG_Circadian_rhythm_Main_Pathway - KEGG Adjusted 1.5	0.306197	0.263048
NCI_N_cadherin_signaling_events_Pathway_(myoblast_differentiation) - NCI 1.2	0.303083	0.258696
reactome_Intrinsic_Pathway_Main_Pathway - Reactome 1.3	0.23782	0.255669
biocarta_oxidative_stress_induced_gene_expression_via_nrf2_Main_Pathway - Biocarta 1.2	0.289734	0.253405
reactome_Synthesis_secretion_and_deacylation_of_Ghrelin_Main_Pathway - Reactome 1.3	0.30094	0.248561
reactome_RNA_Pol_II_CTD_phosphorylation_and_interaction_with_CE_Main_Pathway - Reactome 1.3	0.204573	0.215988
KEGG_Hedgehog_signaling_Main_Pathway - KEGG Adjusted 1.5	0.256196	0.208854
reactome_RNA_Polymerase_II_HIV_Promoter_Escape_Main_Pathway - Reactome 1.3	0.180604	0.206336
reactome_RNA_Polymerase_II_Promoter_Escape_Main_Pathway - Reactome 1.3	0.180604	0.206336
KEGG_Complement_and_coagulation_cascades_Main_Pathway - KEGG Adjusted 1.5	0.203808	0.181064
reactome_Activation_of_the_phototransduction_cascade_Main_Pathway - Reactome 1.3	0.118625	0.169837
AHR_Pathway_Cath_D_expression_via_SP1 - Primary 1.4	0.315326	0.160811
reactome_Abortive_elongation_of_HIV_1_transcript_in_the_absence_of_Tat_Main_Pathway - Reactome 1.3	0.168011	0.159003
reactome_Dual_incision_reaction_in_TC_NER_Main_Pathway - Reactome 1.3	0.0859803	0.133898
AHR_Pathway_C-myc_expression_via_RELA - Primary 1.4	0.308109	0.117594
reactome_ERKs_are_inactivated_Main_Pathway - Reactome 1.3	0.145896	0.104554
AHR_Pathway_PS2_Gene_expression_via_ESR1 - Primary 1.4	0.2556	0.0851615
KEGG_PPAR_signaling_Main_Pathway - KEGG Adjusted 1.5	NA	NA

## Sheet: Ovarian_Cancer
Pathway	Pearson	Spearman
KEGG_Aldosterone_regulated_sodium_reabsorption_Main_Pathway - KEGG Adjusted 1.5	0.690467	0.904524
Tumour_Infiltration_Pathway - Primary 1.4	0.832112	0.873324
biocarta_lck_and_fyn_tyrosine_kinases_in_initiation_of_tcr_activation_Main_Pathway - Biocarta 1.2	0.730082	0.840484
biocarta_the_co_stimulatory_signal_during_t_cell_activation_Pathway_(T_cell_activation) - Biocarta 1.2	0.722237	0.826055
HGF_Pathway_Cell_Cycle_Progression - Primary 1.4	0.801313	0.82502
TRAF_Pathway_Direct_Antimicrobial_Response_and_Cell-Mediated_Immunity_and_Apoptosis_of_Host_Cell - Primary 1.4	0.773035	0.819287
reactome_Interleukin_2_signaling_Main_Pathway - Reactome 1.3	0.76022	0.816191
NAD_ide_novoi_biosynthesis - Metabolism 1.4	0.717497	0.811892
KEGG_Glycosaminoglycan_biosynthesis_keratan_sulfate_Main_Pathway - KEGG Adjusted 1.5	0.729949	0.809428
biocarta_keratinocyte_differentiation_Main_Pathway - Biocarta 1.2	0.75032	0.799411
reactome_ABC_family_proteins_mediated_transport_Main_Pathway - Reactome 1.3	0.722896	0.794544
NCI_EPHA2_forward_signaling_Main_Pathway - NCI 1.2	0.792611	0.791798
reactome_Interferon_gamma_signaling_Main_Pathway - Reactome 1.3	0.796731	0.790763
reactome_Pyrimidine_catabolism_Main_Pathway - Reactome 1.3	0.753621	0.787864
biocarta_role_of_mef2d_in_t_cell_apoptosis_Main_Pathway - Biocarta 1.2	0.743677	0.784711
KEGG_Gap_junction_Main_Pathway - KEGG Adjusted 1.5	0.764517	0.783182
NCI_ErbB1_downstream_signaling_Main_Pathway - NCI 1.2	0.728803	0.781558
reactome_Insulin_receptor_recycling_Main_Pathway - Reactome 1.3	0.765421	0.780793
biocarta_keratinocyte_differentiation_Pathway_(apoptosis) - Biocarta 1.2	0.763816	0.779933
reactome_Activation_of_ATR_in_response_to_replication_stress_Main_Pathway - Reactome 1.3	0.746945	0.77592
TNF_Signaling_Pathway - Primary 1.4	0.795919	0.773945
reactome_Activation_of_the_pre_replicative_complex_Main_Pathway - Reactome 1.3	0.728945	0.767511
NCI_Neurotrophic_factor_mediated_Trk_receptor_signaling_Pathway_(neuron_projection_morphogenesis) - NCI 1.2	0.7577	0.767367
NCI_ErbB1_downstream_signaling_Pathway_(cell_proliferation) - NCI 1.2	0.763792	0.765759
NCI_BCR_signaling_Pathway_(cytokine_secretion) - NCI 1.2	0.701156	0.764389
reactome_Activation_of_gene_expression_by_SREBF_SREBP__Main_Pathway - Reactome 1.3	0.751064	0.763688
NCI_Atypical_NF_kappaB_Main_Pathway - NCI 1.2	0.752267	0.758783
KEGG_Adipocytokine_signaling_Main_Pathway - KEGG Adjusted 1.5	0.762381	0.756394
NCI_Signaling_events_mediated_by_VEGFR1_and_VEGFR2_Pathway_(cell_proliferation) - NCI 1.2	0.750872	0.756076
3-phosphoinositide_degradation - Metabolism 1.4	0.76536	0.756028
biocarta_mapkinase_signaling_Main_Pathway - Biocarta 1.2	0.744453	0.750104
KEGG_Steroid_biosynthesis_Main_Pathway - KEGG Adjusted 1.5	0.758036	0.747969
reactome_Downstream_signal_transduction_Main_Pathway - Reactome 1.3	0.784871	0.747746
UTP_and_CTP_ide_novoi_biosynthesis - Metabolism 1.4	0.716867	0.745724
IL-10_Pathway - Primary 1.4	0.764737	0.745358
KEGG_Type_I_diabetes_mellitus_Main_Pathway - KEGG Adjusted 1.5	0.643837	0.744561
KEGG_Synthesis_and_degradation_of_ketone_bodies_Main_Pathway - KEGG Adjusted 1.5	0.748418	0.743032
biocarta_regulation_of_pgc_1a_Main_Pathway - Biocarta 1.2	0.670765	0.741615
KEGG_Phagosome_Main_Pathway - KEGG Adjusted 1.5	0.728143	0.740819
reactome_Polymerase_switching_Main_Pathway - Reactome 1.3	0.751995	0.740532
reactome_Polymerase_switching_on_the_C_strand_of_the_telomere_Main_Pathway - Reactome 1.3	0.751995	0.740532
TRAF_Pathway - Primary 1.4	0.738549	0.735499
biocarta_t_cell_receptor_signaling_Main_Pathway - Biocarta 1.2	0.67788	0.733445
KEGG_Nicotinate_and_nicotinamide_metabolism_Main_Pathway - KEGG Adjusted 1.5	0.685383	0.729224
CDK5_Signaling_in_Neurons - Cytoskeleton 1.2	0.736045	0.725115
KEGG_Neurotrophin_signaling_Main_Pathway - KEGG Adjusted 1.5	0.69844	0.723889
Ephrin-mediated_Signaling_Events_During_Cell_Adhesion - Cytoskeleton 1.2	0.712916	0.723587
reactome_Interleukin_receptor_SHC_signaling_Main_Pathway - Reactome 1.3	0.687042	0.722169
NCI_Neurotrophic_factor_mediated_Trk_receptor_signaling_Main_Pathway - NCI 1.2	0.710623	0.721548
biocarta_hiv_1_nef_negative_effector_of_fas_and_tnf_Pathway_(Pathway_protein_ubiquitination_of_CHUK) - Biocarta 1.2	0.725748	0.718895
FCGR3A-mediated_phagocytosis - Cytoskeleton 1.2	0.696972	0.718745
CDP-diacylglycerol_biosynthesis - Metabolism 1.4	0.731934	0.718602
NCI_JNK_signaling_in_the_CD4_TCR_Main_Pathway - NCI 1.2	0.711886	0.718251
reactome_IRAK1_recruits_IKK_complex_Main_Pathway - Reactome 1.3	0.700733	0.715292
reactome_IRAK1_recruits_IKK_complex_upon_TLR7_8_or_9_stimulation_Main_Pathway - Reactome 1.3	0.700733	0.715292
NCI_ErbB1_downstream_signaling_Pathway_(ruffle_organization) - NCI 1.2	0.672601	0.714142
biocarta_induction_of_apoptosis_through_dr3_and_dr4_5_death_receptors_Pathway_(Pathway_degradation_of_CASP3_CASP10_CASP10) - Biocarta 1.2	0.706518	0.71384
KEGG_Pathogenic_Escherichia_coli_infection_Main_Pathway - KEGG Adjusted 1.5	0.66723	0.712566
reactome_Downstream_TCR_signaling_Main_Pathway - Reactome 1.3	0.646842	0.71247
HGF_Pathway_Gene_Expression_via_JUN_STAT3_FOS_ELK1_ETS2 - Primary 1.4	0.692045	0.711738
NCI_Signaling_events_mediated_by_TCPTP_Main_Pathway - NCI 1.2	0.714184	0.710814
reactome_RIG_I_MDA5_mediated_induction_of_IFN_alpha_beta_pathways_Main_Pathway - Reactome 1.3	0.703681	0.709158
FN1_Influence_on_Cell_Motility_via_Integrins - Cytoskeleton 1.2	0.680664	0.708138
TNF_Signaling_Pathway_Apoptosis - Primary 1.4	0.707808	0.707979
KEGG_Histidine_metabolism_Main_Pathway - KEGG Adjusted 1.5	0.707688	0.705749
bile_acid_biosynthesis_neutral_pathway - Metabolism 1.4	0.701994	0.703042
NCI_Netrin_mediated_signaling_events_Main_Pathway - NCI 1.2	0.67513	0.700892
NCI_ALK1_signaling_events_Pathway_(endothelial_cell_proliferation) - NCI 1.2	0.689804	0.700351
NCI_ALK2_signaling_events_Main_Pathway - NCI 1.2	0.689804	0.700351
RANK_Signaling_in_Osteoclasts_Pathway_Inhibition_of_Death - Primary 1.4	0.688797	0.695015
IGF1R_Signaling_Pathway_Protein_Synthesis - Primary 1.4	0.693014	0.694776
Ras_Pathway_Apoptosis - Primary 1.4	0.705105	0.694107
KEGG_Hepatitis_C_Main_Pathway - KEGG Adjusted 1.5	0.642952	0.69355
reactome_Signaling_by_constitutively_active_EGFR_Main_Pathway - Reactome 1.3	0.711706	0.693327
KEGG_Fc_epsilon_RI_signaling_Main_Pathway - KEGG Adjusted 1.5	0.709822	0.692053
reactome_Insulin_processing_Main_Pathway - Reactome 1.3	0.621129	0.69183
KEGG_Bacterial_invasion_of_epithelial_cells_Main_Pathway - KEGG Adjusted 1.5	0.661176	0.689728
TRAF_Pathway_Apoptosis - Primary 1.4	0.775314	0.689154
HMGB1_signaling_through_RAGE - Cytoskeleton 1.2	0.665121	0.688501
KEGG_Legionellosis_Main_Pathway - KEGG Adjusted 1.5	0.68496	0.688005
NCI_Nongenotropic_Androgen_signaling_Pathway_(apoptosis) - NCI 1.2	0.644529	0.687036
STAT3_Pathway_Growth_Arrest_and_Differentiation - Primary 1.4	0.68887	0.686813
KEGG_RNA_transport_Main_Pathway - KEGG Adjusted 1.5	0.706587	0.686781
biocarta_induction_of_apoptosis_through_dr3_and_dr4_5_death_receptors_Main_Pathway - Biocarta 1.2	0.727318	0.686335
KEGG_VEGF_signaling_Main_Pathway - KEGG Adjusted 1.5	0.672388	0.683755
NCI_LKB1_signaling_events_Pathway_(establishment_of_cell_polarity) - NCI 1.2	0.687841	0.682688
reactome_Smooth_Muscle_Contraction_Main_Pathway - Reactome 1.3	0.643799	0.681558
cholesterol_biosynthesis_I - Metabolism 1.4	0.682499	0.681191
cholesterol_biosynthesis_II_via_2425-dihydrolanosterol - Metabolism 1.4	0.682499	0.681191
cholesterol_biosynthesis_III_via_desmosterol - Metabolism 1.4	0.682499	0.681191
NCI_Arf6_signaling_events_Main_Pathway - NCI 1.2	0.710985	0.680538
reactome_Acetylcholine_regulates_insulin_secretion_Main_Pathway - Reactome 1.3	0.658761	0.679423
Ras_Pathway_Cell-Cell_Junctions - Primary 1.4	0.672633	0.679153
D-imyoi-inositol_134-trisphosphate_biosynthesis - Metabolism 1.4	0.656826	0.678595
NCI_Signaling_mediated_by_p38_gamma_and_p38_delta_Main_Pathway - NCI 1.2	0.690667	0.677799
IGF1R_Signaling_Pathway_Apoptosis - Primary 1.4	0.669563	0.677688
biocarta_melanocyte_development_and_pigmentation_Main_Pathway - Biocarta 1.2	0.7022	0.677385
KEGG_Bladder_cancer_Main_Pathway - KEGG Adjusted 1.5	0.7022	0.677385
TNF_Signaling_Pathway_Gene_Expression_and_Cell_Survival_via_FOS_NFKB2_JUN_ELK1_ATF6 - Primary 1.4	0.638355	0.676589
reactome_Hyaluronan_uptake_and_degradation_Main_Pathway - Reactome 1.3	0.655139	0.676238
KEGG_Huntington_s_disease_Main_Pathway - KEGG Adjusted 1.5	0.625119	0.676159
NCI_Signaling_events_mediated_by_TCPTP_Pathway_(G1_S_transition_of_mitotic_cell_cycle) - NCI 1.2	0.684994	0.675506
NCI_Signaling_events_mediated_by_TCPTP_Pathway_(macrophage_differentiation) - NCI 1.2	0.684994	0.675506
NCI_Signaling_events_mediated_by_TCPTP_Pathway_(MAPKKK_cascade) - NCI 1.2	0.684994	0.675506
NCI_Signaling_events_mediated_by_TCPTP_Pathway_(regulation_of_gluconeogenesis) - NCI 1.2	0.684994	0.675506
reactome_repression_of_WNT_target_genes_Main_Pathway - Reactome 1.3	0.683902	0.674916
Development_of_Immune_Synapse - Cytoskeleton 1.2	0.690692	0.674582
gamma-linolenate_biosynthesis - Metabolism 1.4	0.634883	0.672639
NCI_Signaling_events_mediated_by_the_Hedgehog_family_Pathway_(receptor_mediated_endocytosis) - NCI 1.2	0.578261	0.671553
KEGG_Osteoclast_differentiation_Main_Pathway - KEGG Adjusted 1.5	0.692824	0.671046
reactome_Signaling_by_SCF_KIT_Main_Pathway - Reactome 1.3	0.686096	0.669581
KEGG_Melanoma_Main_Pathway - KEGG Adjusted 1.5	0.65876	0.668419
KEGG_Gastric_acid_secretion_Main_Pathway - KEGG Adjusted 1.5	0.681794	0.666237
reactome_RNA_Polymerase_II_Pre_transcription_Events_Main_Pathway - Reactome 1.3	0.660656	0.665456
reactome_RNA_Polymerase_II_Transcription_Elongation_Main_Pathway - Reactome 1.3	0.660656	0.665456
reactome_Sphingolipid_de_novo_biosynthesis_Main_Pathway - Reactome 1.3	0.735647	0.665138
KEGG_Base_excision_repair_Main_Pathway - KEGG Adjusted 1.5	0.688401	0.663832
NCI_Signaling_events_mediated_by_Stem_cell_factor_receptor_c_Kit__Main_Pathway - NCI 1.2	0.656799	0.662908
reactome_DNA_Damage_Telomere_Stress_Induced_Senescence_Main_Pathway - Reactome 1.3	0.683969	0.662335
NCI_ErbB2_ErbB3_signaling_events_Main_Pathway - NCI 1.2	0.614727	0.662287
KEGG_p53_signaling_Main_Pathway - KEGG Adjusted 1.5	0.668057	0.660339
KEGG_Leukocyte_transendothelial_migration_Main_Pathway - KEGG Adjusted 1.5	0.659629	0.660201
KEGG_Protein_processing_in_endoplasmic_reticulum_Main_Pathway - KEGG Adjusted 1.5	0.622882	0.659866
KEGG_Folate_biosynthesis_Main_Pathway - KEGG Adjusted 1.5	0.681098	0.659118
VEGF_Pathway - Primary 1.4	0.628232	0.65786
NCI_Signaling_events_mediated_by_TCPTP_Pathway_(positive_regulation_of_S_phase_of_mitotic_cell_cycle) - NCI 1.2	0.657319	0.656984
Calcium2+_Signaling - Cytoskeleton 1.2	0.644256	0.656585
CCR3_Pathway_in_Eosinophils - Cytoskeleton 1.2	0.605497	0.654786
NCI_Lissencephaly_gene_LIS1_in_neuronal_migration_and_development_Main_Pathway - NCI 1.2	0.65121	0.654197
reactome_RMTs_methylate_histone_arginines_Main_Pathway - Reactome 1.3	0.63919	0.654053
NCI_Notch_mediated_HES_HEY_network_Main_Pathway - NCI 1.2	0.707278	0.653878
D-imyoi-inositol-5-phosphate_metabolism - Metabolism 1.4	0.688338	0.651792
reactome_Synthesis_of_PC_Main_Pathway - Reactome 1.3	0.720956	0.651673
STAT3_Pathway - Primary 1.4	0.679957	0.651171
KEGG_Pantothenate_and_CoA_biosynthesis_Main_Pathway - KEGG Adjusted 1.5	0.675517	0.64617
reactome_E2F_enabled_inhibition_of_pre_replication_complex_formation_Main_Pathway - Reactome 1.3	0.60857	0.643781
D-imyoi-inositol_145-trisphosphate_degradation - Metabolism 1.4	0.66845	0.643622
reactome_ISG15_antiviral_mechanism_Main_Pathway - Reactome 1.3	0.600797	0.643176
reactome_Post_chaperonin_tubulin_folding_Main_Pathway - Reactome 1.3	0.638843	0.641519
NCI_Signaling_mediated_by_p38_alpha_and_p38_beta_Main_Pathway - NCI 1.2	0.604932	0.641249
CMP_phosphorylation - Metabolism 1.4	0.627452	0.638
NCI_Alpha_synuclein_signaling_Pathway_(neuron_apoptosis) - NCI 1.2	0.658204	0.634305
1D-imyoi-inositol_hexakisphosphate_biosynthesis_II_mammalian - Metabolism 1.4	0.699754	0.633954
biocarta_inhibition_of_cellular_proliferation_by_gleevec_Main_Pathway - Biocarta 1.2	0.636485	0.633445
CDC42_Pathway - Cytoskeleton 1.2	0.566274	0.632617
KEGG_Collecting_duct_acid_secretion_Main_Pathway - KEGG Adjusted 1.5	0.631809	0.632266
reactome_EPH_ephrin_mediated_repulsion_of_cells_Main_Pathway - Reactome 1.3	0.62491	0.632139
biocarta_il_6_signaling_Main_Pathway - Biocarta 1.2	0.620919	0.629177
HGF_Pathway_Anoikis - Primary 1.4	0.641973	0.628858
NCI_BARD1_signaling_events_Pathway_(DNA_repair) - NCI 1.2	0.643654	0.628317
Chemotaxis_Driven_by_CCL2 - Cytoskeleton 1.2	0.604394	0.627966
biocarta_il_3_signaling_Main_Pathway - Biocarta 1.2	0.692589	0.627745
Chemotaxis_Driven_by_IL-8_and_LTB4 - Cytoskeleton 1.2	0.622341	0.627393
Ras_Pathway_Gene_Expression_Cell_Proliferation_Cell_Survival_Differentiation_Development_Cell_Cycle_Control_Cell_Motility_Tumorigenesis_via_ELK4_ATF2_MEF2D_STAT2_CREB3_CCNA1_MYC_ELK1_JUN_CDK4 - Primary 1.4	0.666161	0.627186
KEGG_Progesterone_mediated_oocyte_maturation_Main_Pathway - KEGG Adjusted 1.5	0.597405	0.626533
KEGG_Amino_sugar_and_nucleotide_sugar_metabolism_Main_Pathway - KEGG Adjusted 1.5	0.604475	0.625991
NCI_BCR_signaling_Main_Pathway - NCI 1.2	0.658017	0.624956
reactome_Prolactin_receptor_signaling_Main_Pathway - Reactome 1.3	0.605883	0.624255
KEGG_Axon_guidance_Main_Pathway - KEGG Adjusted 1.5	0.644307	0.623459
KEGG_Regulation_of_lipolysis_in_adipocytes_Main_Pathway - KEGG Adjusted 1.5	0.627899	0.623332
biocarta_role_of_erbb2_in_signal_transduction_and_oncology_Main_Pathway - Biocarta 1.2	0.592728	0.623252
Cytoskeleton_Reorganization - Cytoskeleton 1.2	0.587499	0.622854
reactome_Abortive_elongation_of_HIV_1_transcript_in_the_absence_of_Tat_Main_Pathway - Reactome 1.3	0.663036	0.622806
NCI_Internalization_of_ErbB1_Main_Pathway - NCI 1.2	0.592604	0.622631
reactome_Dual_incision_reaction_in_GG_NER_Main_Pathway - Reactome 1.3	0.594264	0.621867
biocarta_role_of_pi3k_subunit_p85_in_regulation_of_actin_organization_and_cell_migration_Main_Pathway - Biocarta 1.2	0.596354	0.621516
NCI_Alpha_synuclein_signaling_Pathway_(Pathway_negative_regulation_of_transcription_via_TOR1A_SNCA_STUB1_FKBP1A) - NCI 1.2	0.638364	0.620736
NCI_Alpha_synuclein_signaling_Pathway_(Pathway_positive_regulation_of_gene_specific_transcription_via_TOR1A_SNCA_FKBP1A_STUB1) - NCI 1.2	0.638364	0.620736
adenosine_deoxyribonucleotides_ide_novoi_biosynthesis - Metabolism 1.4	0.603951	0.620624
ATM_Pathway_G2-Mitosis_progression - Primary 1.4	0.580198	0.618012
ATM_Pathway_G2_M_Checkpoint_Arrest - Primary 1.4	0.580198	0.618012
biocarta_skeletal_muscle_hypertrophy_is_regulated_via_akt_mtor_Main_Pathway - Biocarta 1.2	0.649261	0.61771
reactome_Synthesis_of_bile_acids_and_bile_salts_via_24_hydroxycholesterol_Main_Pathway - Reactome 1.3	0.524462	0.617106
reactome_Synthesis_of_bile_acids_and_bile_salts_via_27_hydroxycholesterol_Main_Pathway - Reactome 1.3	0.524462	0.617106
Akt_Signaling_Pathway_Aggregation_and_Neurodegeneration - Primary 1.4	0.616466	0.614859
NCI_Nephrin_Neph1_signaling_in_the_kidney_podocyte_Main_Pathway - NCI 1.2	0.656413	0.614079
biocarta_hypoxia_inducible_factor_in_the_cardivascular_system_Main_Pathway - Biocarta 1.2	0.591758	0.613696
ATM_Pathway_Cell_Survival - Primary 1.4	0.62977	0.612375
reactome_Signaling_by_Hippo_Main_Pathway - Reactome 1.3	0.61994	0.611881
NCI_Neurotrophic_factor_mediated_Trk_receptor_signaling_Pathway_(Schwann_cell_development) - NCI 1.2	0.59082	0.611451
reactome_RNA_Polymerase_III_Abortive_And_Retractive_Initiation_Main_Pathway - Reactome 1.3	0.602529	0.610559
KEGG_TNF_signaling_Main_Pathway - KEGG Adjusted 1.5	0.62432	0.609396
NCI_Signaling_events_mediated_by_focal_adhesion_kinase_Pathway_(negative_regulation_of_cell_adhesion_involved_in_substrate_bound_cell_migration) - NCI 1.2	0.609825	0.609094
NCI_ATM_Main_Pathway - NCI 1.2	0.577457	0.608696
reactome_temp_Post-translational_modification_synthesis_of_GPI-anchored_proteins - Reactome 1.3	0.608556	0.606068
biocarta_influence_of_ras_and_rho_proteins_on_g1_to_s_transition_Main_Pathway - Biocarta 1.2	0.664506	0.603997
NCI_Nongenotropic_Androgen_signaling_Pathway_(cell_proliferation) - NCI 1.2	0.570786	0.603934
reactome_Synthesis_of_Leukotrienes_LT_and_Eoxins_EX__Main_Pathway - Reactome 1.3	0.633179	0.602899
KEGG_Retinol_metabolism_Main_Pathway - KEGG Adjusted 1.5	0.605276	0.601736
biocarta_internal_ribosome_entry_Main_Pathway - Biocarta 1.2	0.568536	0.601019
biocarta_internal_ribosome_entry_Pathway_(translational_initiation) - Biocarta 1.2	0.568536	0.601019
guanosine_nucleotides_ide_novoi_biosynthesis - Metabolism 1.4	0.577422	0.59871
NCI_Signaling_events_mediated_by_PTP1B_Main_Pathway - NCI 1.2	0.648629	0.597388
Chemokine_Ligand_2_Signaling - Cytoskeleton 1.2	0.511709	0.597245
TGF-Beta_Pathway_Post_Transciptional_G1_Arrest - Primary 1.4	0.631935	0.597213
NCI_Signaling_events_mediated_by_focal_adhesion_kinase_Main_Pathway - NCI 1.2	0.584977	0.59664
reactome_KSRP_destabilizes_mRNA_Main_Pathway - Reactome 1.3	0.617115	0.59562
KEGG_Endocytosis_Main_Pathway - KEGG Adjusted 1.5	0.602341	0.59492
IL-10_Pathway_Translational_Modulation - Primary 1.4	0.580638	0.594442
IGF1R_Signaling_Pathway_Cell_Migration - Primary 1.4	0.633372	0.593438
reactome_Synthesis_of_Prostaglandins_PG_and_Thromboxanes_TX__Main_Pathway - Reactome 1.3	0.509141	0.593263
HGF_Pathway_Regulation_of_Cytoskeleton_Cell_Polarity_and_Cell_Motility - Primary 1.4	0.595809	0.593168
NCI_Endogenous_TLR_signaling_Main_Pathway - NCI 1.2	0.619678	0.592785
TRAF_Pathway_Gene_Expression_via_FOS_JUN - Primary 1.4	0.605096	0.591368
NCI_N_cadherin_signaling_events_Pathway_(actin_filament_polymerization) - NCI 1.2	0.564717	0.591097
NCI_N_cadherin_signaling_events_Pathway_(regulation_of_cell_cell_adhesion) - NCI 1.2	0.589422	0.590221
KEGG_Chronic_myeloid_leukemia_Main_Pathway - KEGG Adjusted 1.5	0.579273	0.590062
NCI_Aurora_A_signaling_Pathway_(spindle_assembly) - NCI 1.2	0.648846	0.589744
Ephrin-B_Pathway - Cytoskeleton 1.2	0.572792	0.589043
reactome_Synthesis_of_PIPs_at_the_early_endosome_membrane_Main_Pathway - Reactome 1.3	0.584766	0.588979
KEGG_Arginine_and_proline_metabolism_Main_Pathway - KEGG Adjusted 1.5	0.539647	0.586734
IGF1R_Signaling_Pathway_Cell_Proliferation_Diferentiation_and_Apoptosis - Primary 1.4	0.605554	0.585985
biocarta_mets_affect_on_macrophage_differentiation_Main_Pathway - Biocarta 1.2	0.592846	0.58444
biocarta_regulation_of_bad_phosphorylation_Main_Pathway - Biocarta 1.2	0.585553	0.584313
IL-2_Pathway - Primary 1.4	0.592562	0.583787
reactome_Activation_of_Rac_Main_Pathway - Reactome 1.3	0.590202	0.582051
reactome_Processing_of_Capped_Intron_Containing_Pre_mRNA_Main_Pathway - Reactome 1.3	0.54063	0.581749
KEGG_Pentose_phosphate_Main_Pathway - KEGG Adjusted 1.5	0.514997	0.581175
KEGG_Arachidonic_acid_metabolism_Main_Pathway - KEGG Adjusted 1.5	0.607708	0.580092
NCI_LPA_receptor_mediated_events_Main_Pathway - NCI 1.2	0.543396	0.578611
KEGG_Fanconi_anemia_Main_Pathway - KEGG Adjusted 1.5	0.565147	0.57705
RANK_Signaling_in_Osteoclasts_Pathway_Resorption - Primary 1.4	0.589304	0.575776
reactome_Signaling_by_FGFR1_fusion_mutants_Main_Pathway - Reactome 1.3	0.607825	0.575649
NCI_Signaling_events_mediated_by_HDAC_Class_I_Pathway_(histone_deacetylation) - NCI 1.2	0.54948	0.574948
biocarta_how_does_salmonella_hijack_a_cell_Pathway_(lamellipodium_assembly) - Biocarta 1.2	0.521647	0.574693
biocarta_map_kinase_inactivation_of_smrt_corepressor_Main_Pathway - Biocarta 1.2	0.518739	0.573929
fatty_acid_beta-oxidation_peroxisome - Metabolism 1.4	0.589285	0.573403
Gamma-Aminobutyric_Acid_A_Receptor_Pathway - Cytoskeleton 1.2	0.564802	0.572002
reactome_Dermatan_sulfate_biosynthesis_Main_Pathway - Reactome 1.3	0.526794	0.571078
Akt_Signaling_Pathway_Induction_of_Chromatin_Condensation - Primary 1.4	0.589124	0.570983
KEGG_Glyoxylate_and_dicarboxylate_metabolism_Main_Pathway - KEGG Adjusted 1.5	0.613178	0.569772
HGF_Pathway_Cell_Adhesion_and_Cell_Migration - Primary 1.4	0.579737	0.568387
Ras_Pathway - Primary 1.4	0.543134	0.568004
reactome_Interferon_alpha_beta_signaling_Main_Pathway - Reactome 1.3	0.576659	0.567973
CD16_Pathway_in_Natural_Killer_cells - Cytoskeleton 1.2	0.516698	0.567543
HIF1Alpha_Pathway_Gene_Expression_via_JUN_CREB3 - Primary 1.4	0.605837	0.566237
HIF1Alpha_Pathway_NOS_Pathway - Primary 1.4	0.605837	0.566237
HIF1Alpha_Pathway_VEGF_Pathway - Primary 1.4	0.605837	0.566237
KEGG_Selenocompound_metabolism_Main_Pathway - KEGG Adjusted 1.5	0.556939	0.564453
NCI_Aurora_B_signaling_Main_Pathway - NCI 1.2	0.551205	0.56431
NCI_Signaling_events_mediated_by_Hepatocyte_Growth_Factor_Receptor_c_Met__Pathway_(positive_regulation_of_tyrosine_phosphorylation_of_STAT_protein) - NCI 1.2	0.583527	0.5638
reactome_Purine_catabolism_Main_Pathway - Reactome 1.3	0.531176	0.563673
adenosine_ribonucleotides_ide_novoi_biosynthesis - Metabolism 1.4	0.564427	0.56302
biocarta_nfkb_activation_by_nontypeable_hemophilus_influenzae_Main_Pathway - Biocarta 1.2	0.6241	0.56071
NCI_EPO_signaling_Main_Pathway - NCI 1.2	0.565547	0.56044
biocarta_induction_of_apoptosis_through_dr3_and_dr4_5_death_receptors_Pathway_(apoptosis) - Biocarta 1.2	0.598387	0.560233
KEGG_Pertussis_Main_Pathway - KEGG Adjusted 1.5	0.555489	0.559818
KEGG_Acute_myeloid_leukemia_Main_Pathway - KEGG Adjusted 1.5	0.55101	0.557573
reactome_Signaling_by_NOTCH3_Main_Pathway - Reactome 1.3	0.571198	0.557181
reactome_Signaling_by_NOTCH4_Main_Pathway - Reactome 1.3	0.571198	0.557181
Ras_Pathway_Increased_T-cell_Adhesion - Primary 1.4	0.590203	0.554818
L-kynurenine_degradation - Metabolism 1.4	0.593387	0.55426
Chemotaxis_Driven_by_C5a - Cytoskeleton 1.2	0.570702	0.553623
Akt_Signaling_Pathway_Acetylation_of_proteins - Primary 1.4	0.552954	0.552206
Akt_Signaling_Pathway_Apoptosis - Primary 1.4	0.552954	0.552206
Akt_Signaling_Pathway_AR_mediated_apoptosis - Primary 1.4	0.552954	0.552206
Akt_Signaling_Pathway_Blocks_Apoptosis - Primary 1.4	0.552954	0.552206
Akt_Signaling_Pathway_Blood_cell_differentiation - Primary 1.4	0.552954	0.552206
Akt_Signaling_Pathway_Cell_Cycle_Progression - Primary 1.4	0.552954	0.552206
Akt_Signaling_Pathway_Elevation_of_Glucose_Import - Primary 1.4	0.552954	0.552206
Akt_Signaling_Pathway_ERK_mediated_apoptosis - Primary 1.4	0.552954	0.552206
Akt_Signaling_Pathway_Genetic_Stability - Primary 1.4	0.552954	0.552206
Akt_Signaling_Pathway_JNK_mediated_apoptosis - Primary 1.4	0.552954	0.552206
Akt_Signaling_Pathway_NF-kB_dependent_transciption - Primary 1.4	0.552954	0.552206
Akt_Signaling_Pathway_NF-kB_pathway - Primary 1.4	0.552954	0.552206
Akt_Signaling_Pathway_NFAT_degradation - Primary 1.4	0.552954	0.552206
reactome_RNA_Polymerase_III_Transcription_Initiation_From_Type_1_Promoter_Main_Pathway - Reactome 1.3	0.57979	0.550741
reactome_RNA_Polymerase_III_Transcription_Initiation_From_Type_2_Promoter_Main_Pathway - Reactome 1.3	0.57979	0.550741
NCI_N_cadherin_signaling_events_Pathway_(myoblast_differentiation) - NCI 1.2	0.497302	0.549721
NCI_Signaling_events_mediated_by_the_Hedgehog_family_Main_Pathway - NCI 1.2	0.522185	0.549721
biocarta_role_of_erk5_in_neuronal_survival_Pathway_(cell_survival) - Biocarta 1.2	0.583561	0.548137
IL-2_Pathway_Gene_Expression_via_FYN_LYN_RPS6KB1_PTK2B - Primary 1.4	0.583561	0.548137
reactome_A_tetrasaccharide_linker_sequence_is_required_for_GAG_synthesis_Main_Pathway - Reactome 1.3	0.478378	0.548033
reactome_Ion_transport_by_P_type_ATPases_Main_Pathway - Reactome 1.3	0.467911	0.547842
KEGG_Glycerophospholipid_metabolism_Main_Pathway - KEGG Adjusted 1.5	0.574737	0.547826
reactome_RIP_mediated_NFkB_activation_via_ZBP1_Main_Pathway - Reactome 1.3	0.516981	0.547301
KEGG_Endometrial_cancer_Main_Pathway - KEGG Adjusted 1.5	0.521707	0.545995
HIF1Alpha_Pathway - Primary 1.4	0.482313	0.543813
HIF1Alpha_Pathway_p53_Hypoxia_Pathway - Primary 1.4	0.482313	0.543813
KEGG_Ras_signaling_Main_Pathway - KEGG Adjusted 1.5	0.510042	0.540612
IGF1R_Signaling_Pathway - Primary 1.4	0.564704	0.540468
reactome_Synthesis_of_bile_acids_and_bile_salts_via_7alpha_hydroxycholesterol_Main_Pathway - Reactome 1.3	0.561899	0.539815
NCI_Signaling_events_mediated_by_Hepatocyte_Growth_Factor_Receptor_c_Met__Main_Pathway - NCI 1.2	0.54199	0.538063
KEGG_Tyrosine_metabolism_Main_Pathway - KEGG Adjusted 1.5	0.541641	0.537984
KEGG_Glycosphingolipid_biosynthesis_globo_series_Main_Pathway - KEGG Adjusted 1.5	0.542032	0.536264
biocarta_il_4_signaling_Main_Pathway - Biocarta 1.2	0.536507	0.535627
ATM_Pathway - Primary 1.4	0.518895	0.533604
reactome_Hormone_sensitive_lipase_HSL_mediated_triacylglycerol_hydrolysis_Main_Pathway - Reactome 1.3	0.650808	0.533174
Akt_Signaling_Pathway_Enhancement_of_Breast_Epithelial - Primary 1.4	0.517018	0.532967
KEGG_Dilated_cardiomyopathy_Main_Pathway - KEGG Adjusted 1.5	0.461941	0.531438
KEGG_Hypertrophic_cardiomyopathy_HCM__Main_Pathway - KEGG Adjusted 1.5	0.461941	0.531438
NCI_Arf6_trafficking_events_Pathway_(cell_adhesion_mediated_by_integrin) - NCI 1.2	0.576101	0.531167
reactome_DCC_mediated_attractive_signaling_Main_Pathway - Reactome 1.3	0.53906	0.529989
reactome_ERK_MAPK_targets_Main_Pathway - Reactome 1.3	0.556245	0.527218
NCI_Aurora_A_signaling_Pathway_(protein_catabolic_process) - NCI 1.2	0.522311	0.527043
Akt_Signaling_Pathway_Increased_GLUT4_translocation - Primary 1.4	0.530389	0.526835
reactome_Signaling_by_ERBB2_Main_Pathway - Reactome 1.3	0.547507	0.526565
NCI_LKB1_signaling_events_Pathway_(Pathway_positive_regulation_of_CREB_transcription_factor_activity_via_CRTC2) - NCI 1.2	0.482371	0.526374
reactome_Depolymerisation_of_the_Nuclear_Lamina_Main_Pathway - Reactome 1.3	0.527705	0.524924
NCI_Ephrin_B_reverse_signaling_Main_Pathway - NCI 1.2	0.515394	0.523539
NCI_EPHA_forward_signaling_Pathway_(proteasomal_ubiquitin_dependent_protein_catabolic_process) - NCI 1.2	0.618426	0.522918
KEGG_Propanoate_metabolism_Main_Pathway - KEGG Adjusted 1.5	0.458495	0.519939
Akt_Signaling_Pathway_Glycogen_Synthesis_and_Apoptosis - Primary 1.4	0.544104	0.518124
reactome_RNA_Polymerase_III_Transcription_Termination_Main_Pathway - Reactome 1.3	0.526941	0.517996
KEGG_Pancreatic_cancer_Main_Pathway - KEGG Adjusted 1.5	0.48503	0.513473
reactome_pre_mRNA_splicing_Main_Pathway - Reactome 1.3	0.524055	0.508887
KEGG_Lysosome_Main_Pathway - KEGG Adjusted 1.5	0.477326	0.508568
reactome_Striated_Muscle_Contraction_Main_Pathway - Reactome 1.3	0.487761	0.508218
NCI_Sphingosine_1_phosphate_S1P_Main_Pathway - NCI 1.2	0.507806	0.508043
reactome_Interleukin_1_signaling_Main_Pathway - Reactome 1.3	0.560397	0.505144
ICOS_signaling_in_T-helper_cells - Cytoskeleton 1.2	0.485962	0.504204
biocarta_mcalpain_and_friends_in_cell_motility_Main_Pathway - Biocarta 1.2	0.524372	0.504109
IL-10_Pathway_IL-10_Responsive_Genes_Transcription_of_BCLXL_Cyclin-D1_D2_D3_Pim1_c-Myc_and_P19(INK4D)_via_STAT3 - Primary 1.4	0.525605	0.503329
IL-10_Pathway_Inflammatory_Cytokine_Genes_Expression_via_STAT3 - Primary 1.4	0.525605	0.503329
NCI_Signaling_events_mediated_by_HDAC_Class_I_Main_Pathway - NCI 1.2	0.493226	0.50223
Chemotaxis_Driven_by_CCR4 - Cytoskeleton 1.2	0.503968	0.501577
Chemotaxis_of_Immune_Cells_During_Allergic_Asthma_and_Eczema_Driven_by_CCR4 - Cytoskeleton 1.2	0.503968	0.501577
reactome_RNA_Pol_II_CTD_phosphorylation_and_interaction_with_CE_Main_Pathway - Reactome 1.3	0.594422	0.500462
NCI_Nongenotropic_Androgen_signaling_Main_Pathway - NCI 1.2	0.487921	0.499315
reactome_Downregulation_of_SMAD2_3_SMAD4_transcriptional_activity_Main_Pathway - Reactome 1.3	0.510248	0.496799
reactome_Synthesis_of_very_long_chain_fatty_acyl_CoAs_Main_Pathway - Reactome 1.3	0.503411	0.496799
NCI_N_cadherin_signaling_events_Main_Pathway - NCI 1.2	0.47863	0.496178
reactome_Prefoldin_mediated_transfer_of_substrate_to_CCT_TriC_Main_Pathway - Reactome 1.3	0.456327	0.495604
NCI_Signaling_events_mediated_by_PRL_Main_Pathway - NCI 1.2	0.490333	0.49363
TGF-Beta_Pathway - Primary 1.4	0.444605	0.492785
NCI_BARD1_signaling_events_Main_Pathway - NCI 1.2	0.480277	0.492658
glutathione-mediated_detoxification - Metabolism 1.4	0.606781	0.491416
Akt_Pathway_Regulation_by_GH - Cytoskeleton 1.2	0.465592	0.491145
reactome_Synthesis_of_PIPs_at_the_plasma_membrane_Main_Pathway - Reactome 1.3	0.502794	0.491018
KEGG_Taste_transduction_Main_Pathway - KEGG Adjusted 1.5	0.466499	0.490444
KEGG_Colorectal_cancer_Main_Pathway - KEGG Adjusted 1.5	0.489246	0.490349
KEGG_Sphingolipid_metabolism_Main_Pathway - KEGG Adjusted 1.5	0.488387	0.489951
NCI_LKB1_signaling_events_Main_Pathway - NCI 1.2	0.480294	0.487928
KEGG_Spliceosome_Main_Pathway - KEGG Adjusted 1.5	0.483104	0.487673
biocarta_stathmin_and_breast_cancer_resistance_to_antimicrotubule_agents_Main_Pathway - Biocarta 1.2	0.515314	0.487625
reactome_DSCAM_interactions_Main_Pathway - Reactome 1.3	0.675494	0.486097
NCI_Signaling_events_regulated_by_Ret_tyrosine_kinase_Pathway_(lamellipodium_assembly) - NCI 1.2	0.553026	0.485157
reactome_ECM_proteoglycans_Main_Pathway - Reactome 1.3	0.474545	0.483931
NCI_Alpha6_beta4_integrin_ligand_interactions_Main_Pathway - NCI 1.2	0.487761	0.481016
NCI_Arf1_Main_Pathway - NCI 1.2	0.506698	0.480968
biocarta_lissencephaly_gene_lis1_in_neuronal_migration_and_development_Pathway_(retrograde_axon_cargo_transport) - Biocarta 1.2	0.436209	0.480236
reactome_Synthesis_secretion_and_deacylation_of_Ghrelin_Main_Pathway - Reactome 1.3	0.43642	0.48014
reactome_Synthesis_secretion_and_inactivation_of_Glucagon_like_Peptide_1_GLP_1__Main_Pathway - Reactome 1.3	0.43642	0.48014
reactome_Synthesis_secretion_and_inactivation_of_Glucose_dependent_Insulinotropic_Polypeptide_GIP__Main_Pathway - Reactome 1.3	0.43642	0.48014
reactome_RNA_Polymerase_III_Chain_Elongation_Main_Pathway - Reactome 1.3	0.494416	0.477528
reactome_RNA_Polymerase_III_Transcription_Initiation_From_Type_3_Promoter_Main_Pathway - Reactome 1.3	0.494416	0.477528
reactome_AKT_phosphorylates_targets_in_the_cytosol_Main_Pathway - Reactome 1.3	0.47216	0.476828
biocarta_regulation_of_ck1_cdk5_by_type_1_glutamate_receptors_Main_Pathway - Biocarta 1.2	0.559982	0.47592
reactome_Acetylcholine_Neurotransmitter_Release_Cycle_Main_Pathway - Reactome 1.3	0.648925	0.474675
reactome_Dopamine_Neurotransmitter_Release_Cycle_Main_Pathway - Reactome 1.3	0.648925	0.474675
TCA_cycle - Metabolism 1.4	0.503334	0.474486
NCI_Beta5_beta6_beta7_and_beta8_integrin_cell_surface_interactions_Main_Pathway - NCI 1.2	0.446947	0.473706
reactome_EPHB_mediated_forward_signaling_Main_Pathway - Reactome 1.3	0.420755	0.473483
KEGG_Salivary_secretion_Main_Pathway - KEGG Adjusted 1.5	0.476627	0.473021
IGF1R_Signaling_Pathway_Cell_Survival - Primary 1.4	0.417477	0.471986
FAK_Pathway - Cytoskeleton 1.2	0.458499	0.47197
Cell_Adhesion_Regulated_by_CDHs - Cytoskeleton 1.2	0.548252	0.470712
NCI_EPHA_forward_signaling_Main_Pathway - NCI 1.2	0.579363	0.468737
D-imyoi-inositol_145-trisphosphate_biosynthesis - Metabolism 1.4	0.51423	0.468355
reactome_Activation_of_Matrix_Metalloproteinases_Main_Pathway - Reactome 1.3	0.462712	0.465934
reactome_Activation_of_the_AP_1_family_of_transcription_factors_Main_Pathway - Reactome 1.3	0.475613	0.464182
KEGG_Tight_junction_Main_Pathway - KEGG Adjusted 1.5	0.482662	0.461984
biocarta_integrin_signaling_Main_Pathway - Biocarta 1.2	0.448292	0.461905
KEGG_Thyroid_hormone_signaling_Main_Pathway - KEGG Adjusted 1.5	0.519434	0.461331
reactome_Initial_triggering_of_complement_Main_Pathway - Reactome 1.3	0.42821	0.460392
reactome_Degradation_of_the_extracellular_matrix_Main_Pathway - Reactome 1.3	0.5258	0.459803
NCI_Endothelins_Main_Pathway - NCI 1.2	0.463033	0.456824
KEGG_Glutamatergic_synapse_Main_Pathway - KEGG Adjusted 1.5	0.492871	0.456665
biocarta_insulin_signaling_Main_Pathway - Biocarta 1.2	0.550818	0.455885
TGF-Beta_Pathway_Transciption_Arrested_Growth_Apoptosis - Primary 1.4	0.492085	0.447492
TGF-Beta_Pathway_Transciption_Cell_Growth_and_Mobility_and_Angiogenesis - Primary 1.4	0.492085	0.447492
IGF1R_Signaling_Pathway_Gene_Expression_Proliferation_Growth_Survival_via_NFAT5_CREB3 - Primary 1.4	0.461104	0.44738
reactome_snRNP_Assembly_Main_Pathway - Reactome 1.3	0.424811	0.442809
reactome_Pre_NOTCH_Processing_in_Golgi_Main_Pathway - Reactome 1.3	0.539323	0.44273
Akt_Signaling_Pathway_Cell_Survival - Primary 1.4	0.453746	0.442316
NCI_ALK1_signaling_events_Main_Pathway - NCI 1.2	0.430204	0.441217
biocarta_inactivation_of_gsk3_by_akt_causes_accumulation_of_b_catenin_in_alveolar_macrophages_Main_Pathway - Biocarta 1.2	0.522362	0.440962
NCI_EPHA_forward_signaling_Pathway_(cell_cell_adhesion) - NCI 1.2	0.51478	0.438573
NCI_EPHA_forward_signaling_Pathway_(regulation_of_stress_fiber_assembly) - NCI 1.2	0.51478	0.438573
reactome_Synthesis_of_PIPs_at_the_Golgi_membrane_Main_Pathway - Reactome 1.3	0.424966	0.433795
NCI_Nectin_adhesion_Main_Pathway - NCI 1.2	0.413931	0.433254
NCI_Aurora_A_signaling_Pathway_(centrosome_duplication) - NCI 1.2	0.549847	0.432951
reactome_temp_Nuclear_Receptor_transcription_pathway - Reactome 1.3	0.471312	0.43261
reactome_Polo_like_kinase_mediated_events_Main_Pathway - Reactome 1.3	0.445082	0.43201
reactome_p75NTR_recruits_signalling_complexes_Main_Pathway - Reactome 1.3	0.416715	0.431709
biocarta_repression_of_pain_sensation_by_the_transcriptional_regulator_dream_Main_Pathway - Biocarta 1.2	0.349715	0.431295
reactome_Synthesis_of_PA_Main_Pathway - Reactome 1.3	0.521004	0.430116
biocarta_regulators_of_bone_mineralization_Main_Pathway - Biocarta 1.2	0.379594	0.429161
HGF_Pathway_Cell_Scattering - Primary 1.4	0.403503	0.427966
HGF_Pathway_Cell_Survival - Primary 1.4	0.403503	0.427966
TGF-Beta_Pathway_Epithelial_Mesenchymal_Transdifferentiation - Primary 1.4	0.403503	0.427966
reactome_temp_Immunoregulatory_interactions_between_a_Lymphoid_and_a_non-Lymphoid_cell - Reactome 1.3	0.426736	0.427775
biocarta_mechanism_of_protein_import_into_the_nucleus_Main_Pathway - Biocarta 1.2	0.429238	0.427695
reactome_Keratan_sulfate_biosynthesis_Main_Pathway - Reactome 1.3	0.38298	0.426915
NCI_Ephrin_B_reverse_signaling_Pathway_(angiogenesis) - NCI 1.2	0.438402	0.423755
NCI_Ephrin_B_reverse_signaling_Pathway_(cell_adhesion) - NCI 1.2	0.438402	0.423755
NCI_Ephrin_B_reverse_signaling_Pathway_(endothelial_cell_migration) - NCI 1.2	0.438402	0.423755
KEGG_Glycosphingolipid_biosynthesis_ganglio_series_Main_Pathway - KEGG Adjusted 1.5	0.485499	0.416197
reactome_Activated_NOTCH1_Transmits_Signal_to_the_Nucleus_Main_Pathway - Reactome 1.3	0.428937	0.414063
3-phosphoinositide_biosynthesis - Metabolism 1.4	0.388169	0.413728
KEGG_Protein_export_Main_Pathway - KEGG Adjusted 1.5	0.373471	0.41255
biocarta_mechanisms_of_transcriptional_repression_by_dna_methylation_Main_Pathway - Biocarta 1.2	0.394518	0.411706
biocarta_mechanisms_of_transcriptional_repression_by_dna_methylation_Pathway_(histone_deacetylation) - Biocarta 1.2	0.394518	0.411706
NCI_Endogenous_TLR_signaling_Pathway_(regulation_of_apoptosis) - NCI 1.2	0.485928	0.408648
NCI_Endogenous_TLR_signaling_Pathway_(regulation_of_cell_proliferation) - NCI 1.2	0.485928	0.408648
NCI_Endogenous_TLR_signaling_Pathway_(regulation_of_interleukin_1_beta_production) - NCI 1.2	0.485928	0.408648
NCI_Signaling_events_regulated_by_Ret_tyrosine_kinase_Main_Pathway - NCI 1.2	0.398248	0.407453
FGFR_Signaling - Cytoskeleton 1.2	0.376208	0.406147
reactome_ERKs_are_inactivated_Main_Pathway - Reactome 1.3	0.441696	0.405049
KEGG_Morphine_addiction_Main_Pathway - KEGG Adjusted 1.5	0.38899	0.400462
reactome_Processing_of_Intronless_Pre_mRNAs_Main_Pathway - Reactome 1.3	0.432077	0.400223
KEGG_Basal_transcription_factors_Main_Pathway - KEGG Adjusted 1.5	0.379125	0.395238
CDK5_Pathway_in_Central_Nervous_System - Cytoskeleton 1.2	0.308523	0.3932
KEGG_Wnt_signaling_Main_Pathway - KEGG Adjusted 1.5	0.348756	0.390397
NCI_Signaling_events_mediated_by_VEGFR1_and_VEGFR2_Main_Pathway - NCI 1.2	0.378931	0.388963
reactome_Deadenylation_of_mRNA_Main_Pathway - Reactome 1.3	0.356523	0.387801
KEGG_Insulin_secretion_Main_Pathway - KEGG Adjusted 1.5	0.427321	0.387211
reactome_EPHA_mediated_growth_cone_collapse_Main_Pathway - Reactome 1.3	0.386555	0.387148
NCI_Integrins_in_angiogenesis_Main_Pathway - NCI 1.2	0.353309	0.383755
KEGG_Hedgehog_signaling_Main_Pathway - KEGG Adjusted 1.5	0.404564	0.383596
reactome_Platelet_sensitization_by_LDL_Main_Pathway - Reactome 1.3	0.37985	0.380491
biocarta_keratinocyte_differentiation_Pathway_(keratinocyte_differentiation) - Biocarta 1.2	0.39591	0.380239
KEGG_Transcriptional_misregulation_in_cancer_Main_Pathway - KEGG Adjusted 1.5	0.383036	0.376541
biocarta_rho_selective_guanine_exchange_factor_akap13_mediates_stress_fiber_formation_Main_Pathway - Biocarta 1.2	0.368844	0.375251
Ubiquitin-Proteasome_Dependent_Proteolysis_Pathway - Primary 1.4	0.336394	0.375187
NCI_ErbB2_ErbB3_signaling_events_Pathway_(myelination) - NCI 1.2	0.407602	0.374709
KEGG_Peroxisome_Main_Pathway - KEGG Adjusted 1.5	0.370116	0.373085
NCI_Signaling_events_mediated_by_focal_adhesion_kinase_Pathway_(cell_migration) - NCI 1.2	0.417316	0.369693
biocarta_lissencephaly_gene_lis1_in_neuronal_migration_and_development_Main_Pathway - Biocarta 1.2	0.445954	0.36294
NCI_Integrins_in_angiogenesis_Pathway_(angiogenesis) - NCI 1.2	0.264728	0.361172
reactome_Dual_incision_reaction_in_TC_NER_Main_Pathway - Reactome 1.3	0.416044	0.36001
reactome_DARPP_32_events_Main_Pathway - Reactome 1.3	0.332003	0.354611
Extracellular_Matrix_Remodeling_during_Adhesion - Cytoskeleton 1.2	0.333526	0.351409
KEGG_Renin_angiotensin_system_Main_Pathway - KEGG Adjusted 1.5	0.429484	0.350629
CXC_Chemokine_Receptor_Pathway - Cytoskeleton 1.2	0.348892	0.348591
Hedgehog_Signaling_in_Mammals_Pathway - Primary 1.4	0.383111	0.346504
NCI_EPHA_forward_signaling_Pathway_(axon_guidance) - NCI 1.2	0.55955	0.344322
reactome_IRF3_mediated_induction_of_type_I_IFN_Main_Pathway - Reactome 1.3	0.304047	0.341392
reactome_Integrin_cell_surface_interactions_Main_Pathway - Reactome 1.3	0.274798	0.327043
reactome_EGFR_downregulation_Main_Pathway - Reactome 1.3	0.330836	0.326613
Ras_Pathway_Golgi_Trafficking_and_Vesicle_Formation - Primary 1.4	0.30117	0.326183
AHR_Pathway_C-myc_expression_via_RELA - Primary 1.4	0.433117	0.325753
reactome_Activation_of_PPARGC1A_PGC_1alpha_by_phosphorylation_Main_Pathway - Reactome 1.3	0.391155	0.323778
NCI_LPA_receptor_mediated_events_Pathway_(cAMP_biosynthetic_process) - NCI 1.2	0.296282	0.321341
reactome_Downregulation_of_TGF_beta_receptor_signaling_Main_Pathway - Reactome 1.3	0.315747	0.318363
NCI_Notch_signaling_Main_Pathway - NCI 1.2	0.275459	0.318124
reactome_APC_C_Cdc20_mediated_degradation_of_Cyclin_B_Main_Pathway - Reactome 1.3	0.330671	0.316372
Akt_Signaling_Pathway - Primary 1.4	0.272211	0.313219
NCI_E_cadherin_signaling_in_keratinocytes_Pathway_(adherens_junction_organization) - NCI 1.2	0.310169	0.312725
reactome_regulation_of_FZD_by_ubiquitination_Main_Pathway - Reactome 1.3	0.344287	0.304029
NCI_Arf6_trafficking_events_Pathway_(calcium_ion_dependent_exocytosis) - NCI 1.2	0.357656	0.299889
Hedgehog_Signaling_in_Mammals_no_Tubulin_Pathway - Primary 1.4	0.333433	0.29965
reactome_APC_C_Cdc20_mediated_degradation_of_Securin_Main_Pathway - Reactome 1.3	0.259864	0.299013
reactome_APC_C_Cdh1_mediated_degradation_of_Cdc20_and_other_APC_C_Cdh1_targeted_proteins_in_late_mitosis_early_G1_Main_Pathway - Reactome 1.3	0.259864	0.299013
KEGG_Complement_and_coagulation_cascades_Main_Pathway - KEGG Adjusted 1.5	0.223826	0.297595
SMAD_Signaling_Network_Pathway - Primary 1.4	0.324627	0.294967
NCI_E_cadherin_signaling_in_keratinocytes_Pathway_(apoptosis) - NCI 1.2	0.253699	0.294187
NCI_E_cadherin_signaling_in_keratinocytes_Pathway_(keratinocyte_differentiation) - NCI 1.2	0.253699	0.294187
NCI_Arf6_trafficking_events_Pathway_(clathrin_coat_assembly) - NCI 1.2	0.313381	0.291703
IL-2_Pathway_Apoptosis_Inhibition - Primary 1.4	0.258807	0.290854
TRAF_Pathway_Cell_Survival - Primary 1.4	0.258807	0.290854
NCI_Beta1_integrin_cell_surface_interactions_Main_Pathway - NCI 1.2	0.276492	0.284042
reactome_Deposition_of_new_CENPA_containing_nucleosomes_at_the_centromere_Main_Pathway - Reactome 1.3	0.319802	0.282497
NCI_Signaling_events_mediated_by_VEGFR1_and_VEGFR2_Pathway_(focal_adhesion_assembly) - NCI 1.2	0.211744	0.280905
NCI_Beta2_integrin_cell_surface_interactions_Main_Pathway - NCI 1.2	0.195901	0.280395
reactome_Activation_of_NF_kappaB_in_B_cells_Main_Pathway - Reactome 1.3	0.252512	0.278882
AHR_Pathway_Cath_D_expression_via_SP1 - Primary 1.4	0.371877	0.276557
AHR_Pathway_PS2_Gene_expression_via_ESR1 - Primary 1.4	0.371877	0.276557
KEGG_Ubiquitin_mediated_proteolysis_Main_Pathway - KEGG Adjusted 1.5	0.253385	0.276413
NCI_Beta3_integrin_cell_surface_interactions_Main_Pathway - NCI 1.2	0.247313	0.275442
NCI_E_cadherin_signaling_in_the_nascent_adherens_junction_Pathway_(regulation_of_actin_nucleation) - NCI 1.2	0.309506	0.274518
NCI_E_cadherin_signaling_in_the_nascent_adherens_junction_Main_Pathway - NCI 1.2	0.250431	0.272305
NCI_E_cadherin_signaling_in_keratinocytes_Main_Pathway - NCI 1.2	0.256467	0.263704
reactome_Dissolution_of_Fibrin_Clot_Main_Pathway - Reactome 1.3	0.247298	0.26122
KEGG_GABAergic_synapse_Main_Pathway - KEGG Adjusted 1.5	0.300891	0.256904
reactome_Iron_uptake_and_transport_Main_Pathway - Reactome 1.3	0.252065	0.254738
AHR_Pathway - Primary 1.4	0.319721	0.250311
reactome_Detoxification_of_Reactive_Oxygen_Species_Main_Pathway - Reactome 1.3	0.24854	0.2491
reactome_Activation_of_DNA_fragmentation_factor_Main_Pathway - Reactome 1.3	0.173259	0.247109
reactome_Degradation_of_beta_catenin_by_the_destruction_complex_Main_Pathway - Reactome 1.3	0.216845	0.244561
NCI_CD40_CD40L_signaling_Main_Pathway - NCI 1.2	0.265223	0.241918
NCI_Signaling_events_mediated_by_VEGFR1_and_VEGFR2_Pathway_(angiogenesis) - NCI 1.2	0.226342	0.231852
NCI_Signaling_events_mediated_by_VEGFR1_and_VEGFR2_Pathway_(regulation_of_vascular_permeability) - NCI 1.2	0.226342	0.231852
reactome_APC_C_Cdc20_mediated_degradation_of_mitotic_proteins_Main_Pathway - Reactome 1.3	0.29719	0.226198
reactome_Inactivation_of_APC_C_via_direct_inhibition_of_the_APC_C_complex_Main_Pathway - Reactome 1.3	0.29719	0.226198
reactome_ADP_signalling_through_P2Y_purinoceptor_1_Main_Pathway - Reactome 1.3	0.240687	0.216977
biocarta_proteasome_complex_Pathway_(Pathway_degradation_of_PSMA1) - Biocarta 1.2	0.128224	0.215385
reactome_Intrinsic_Pathway_Main_Pathway - Reactome 1.3	0.159222	0.198089
NCI_Endothelins_Pathway_(cAMP_biosynthetic_process) - NCI 1.2	0.219309	0.195811
reactome_Activation_of_IRF3_IRF7_mediated_by_TBK1_IKK_epsilon_Main_Pathway - Reactome 1.3	0.225916	0.194999
NCI_Notch_signaling_Pathway_(Bergmann_glial_cell_differentiation) - NCI 1.2	0.185479	0.190428
NCI_Notch_signaling_Pathway_(oligodendrocyte_development) - NCI 1.2	0.185479	0.190428
KEGG_RNA_polymerase_Main_Pathway - KEGG Adjusted 1.5	0.253725	0.188055
reactome_RNA_Polymerase_II_HIV_Promoter_Escape_Main_Pathway - Reactome 1.3	0.253725	0.188055
reactome_RNA_Polymerase_II_Promoter_Escape_Main_Pathway - Reactome 1.3	0.253725	0.188055
reactome_Inhibition_of_replication_initiation_of_damaged_DNA_by_RB1_E2F1_Main_Pathway - Reactome 1.3	0.239866	0.180989
Angiotensin-PTK2B_Pathway - Cytoskeleton 1.2	0.200703	0.177019
biocarta_multi_step_regulation_of_transcription_by_pitx2_Main_Pathway - Biocarta 1.2	0.240965	0.17635
reactome_Activation_of_the_phototransduction_cascade_Main_Pathway - Reactome 1.3	0.152577	0.164268
reactome_Integrin_alphaIIb_beta3_signaling_Main_Pathway - Reactome 1.3	0.0616408	0.159118
reactome_ADP_signalling_through_P2Y_purinoceptor_12_Main_Pathway - Reactome 1.3	0.20645	0.158927
KEGG_Alcoholism_Main_Pathway - KEGG Adjusted 1.5	0.129217	0.083182
reactome_APC_Cdc20_mediated_degradation_of_Nek2A_Main_Pathway - Reactome 1.3	0.0600485	0.0501991
reactome_Activation_of_G_protein_gated_Potassium_channels_Main_Pathway - Reactome 1.3	0.1031	-0.00444338
reactome_Inhibition_of_voltage_gated_Ca2_channels_via_Gbeta_gamma_subunits_Main_Pathway - Reactome 1.3	0.1031	-0.00444338
reactome_Presynaptic_function_of_Kainate_receptors_Main_Pathway - Reactome 1.3	0.1031	-0.00444338
reactome_Prostacyclin_signalling_through_prostacyclin_receptor_Main_Pathway - Reactome 1.3	0.119023	-0.00582895
reactome_ABCA_transporters_in_lipid_homeostasis_Main_Pathway - Reactome 1.3	-0.0322214	-0.0173435
reactome_IRAK2_mediated_activation_of_TAK1_complex_Main_Pathway - Reactome 1.3	0.0200546	-0.0444609
reactome_IRAK2_mediated_activation_of_TAK1_complex_upon_TLR7_8_or_9_stimulation_Main_Pathway - Reactome 1.3	0.0200546	-0.0444609
biocarta_il_7_signal_transduction_Main_Pathway - Biocarta 1.2	NA	NA
biocarta_oxidative_stress_induced_gene_expression_via_nrf2_Main_Pathway - Biocarta 1.2	NA	NA
chondroitin_sulfate_biosynthesis - Metabolism 1.4	NA	NA
chondroitin_sulfate_biosynthesis_late_stages - Metabolism 1.4	NA	NA
dermatan_sulfate_biosynthesis - Metabolism 1.4	NA	NA
heparan_sulfate_biosynthesis - Metabolism 1.4	NA	NA
heparan_sulfate_biosynthesis_late_stages - Metabolism 1.4	NA	NA
KEGG_alpha_Linolenic_acid_metabolism_Main_Pathway - KEGG Adjusted 1.5	NA	NA
KEGG_Circadian_rhythm_Main_Pathway - KEGG Adjusted 1.5	NA	NA
KEGG_Linoleic_acid_metabolism_Main_Pathway - KEGG Adjusted 1.5	NA	NA
KEGG_PPAR_signaling_Main_Pathway - KEGG Adjusted 1.5	NA	NA
KEGG_Thyroid_hormone_synthesis_Main_Pathway - KEGG Adjusted 1.5	NA	NA
NCI_AP_1_transcription_factor_network_Main_Pathway - NCI 1.2	NA	NA
NCI_Neurotrophic_factor_mediated_Trk_receptor_signaling_Pathway_(MAPKKK_cascade) - NCI 1.2	NA	NA
reactome_Activated_point_mutants_of_FGFR2_Main_Pathway - Reactome 1.3	NA	NA
reactome_E2F_mediated_regulation_of_DNA_replication_Main_Pathway - Reactome 1.3	NA	NA
reactome_Interaction_With_The_Zona_Pellucida_Main_Pathway - Reactome 1.3	NA	NA
reactome_Interleukin_7_signaling_Main_Pathway - Reactome 1.3	NA	NA
reactome_Signaling_by_BMP_Main_Pathway - Reactome 1.3	NA	NA
reactome_Signaling_by_FGFR_mutants_Main_Pathway - Reactome 1.3	NA	NA
reactome_Signaling_by_NODAL_Main_Pathway - Reactome 1.3	NA	NA
reactome_Synthesis_of_glycosylphosphatidylinositol_GPI__Main_Pathway - Reactome 1.3	NA	NA

## Sheet: Pancreatic_Ductal_Adenocarcinom
Pathway	Pearson	Spearman
KEGG_Histidine_metabolism_Main_Pathway - KEGG Adjusted 1.5	0.634364	0.615286
L-kynurenine_degradation - Metabolism 1.4	0.605796	0.605919
NCI_Beta5_beta6_beta7_and_beta8_integrin_cell_surface_interactions_Main_Pathway - NCI 1.2	0.590401	0.577884
Extracellular_Matrix_Remodeling_during_Adhesion - Cytoskeleton 1.2	0.602672	0.571387
NCI_Signaling_events_mediated_by_Hepatocyte_Growth_Factor_Receptor_c_Met__Pathway_(positive_regulation_of_tyrosine_phosphorylation_of_STAT_protein) - NCI 1.2	0.575247	0.566856
biocarta_t_cell_receptor_signaling_Main_Pathway - Biocarta 1.2	0.565594	0.562216
KEGG_Synthesis_and_degradation_of_ketone_bodies_Main_Pathway - KEGG Adjusted 1.5	0.559315	0.561344
biocarta_repression_of_pain_sensation_by_the_transcriptional_regulator_dream_Main_Pathway - Biocarta 1.2	0.511238	0.55103
KEGG_Glycosphingolipid_biosynthesis_ganglio_series_Main_Pathway - KEGG Adjusted 1.5	0.51767	0.541448
Tumour_Infiltration_Pathway - Primary 1.4	0.628148	0.539236
biocarta_the_co_stimulatory_signal_during_t_cell_activation_Pathway_(T_cell_activation) - Biocarta 1.2	0.536192	0.535992
D-imyoi-inositol-5-phosphate_metabolism - Metabolism 1.4	0.578331	0.535759
NCI_E_cadherin_signaling_in_keratinocytes_Pathway_(adherens_junction_organization) - NCI 1.2	0.520816	0.533953
NCI_Beta1_integrin_cell_surface_interactions_Main_Pathway - NCI 1.2	0.530777	0.533752
NCI_BCR_signaling_Main_Pathway - NCI 1.2	0.522162	0.519102
NCI_Alpha6_beta4_integrin_ligand_interactions_Main_Pathway - NCI 1.2	0.563578	0.517389
KEGG_Taste_transduction_Main_Pathway - KEGG Adjusted 1.5	0.564406	0.515607
Akt_Signaling_Pathway - Primary 1.4	0.480162	0.515205
KEGG_Base_excision_repair_Main_Pathway - KEGG Adjusted 1.5	0.576366	0.512662
NCI_JNK_signaling_in_the_CD4_TCR_Main_Pathway - NCI 1.2	0.666246	0.511887
KEGG_Regulation_of_lipolysis_in_adipocytes_Main_Pathway - KEGG Adjusted 1.5	0.578773	0.510636
KEGG_Huntington_s_disease_Main_Pathway - KEGG Adjusted 1.5	0.527944	0.509983
KEGG_RNA_transport_Main_Pathway - KEGG Adjusted 1.5	0.5354	0.507733
NCI_Atypical_NF_kappaB_Main_Pathway - NCI 1.2	0.493302	0.506637
biocarta_regulation_of_pgc_1a_Main_Pathway - Biocarta 1.2	0.392645	0.50588
biocarta_mechanism_of_protein_import_into_the_nucleus_Main_Pathway - Biocarta 1.2	0.562734	0.503281
NCI_Alpha_synuclein_signaling_Pathway_(Pathway_negative_regulation_of_transcription_via_TOR1A_SNCA_STUB1_FKBP1A) - NCI 1.2	0.535563	0.502534
NCI_Alpha_synuclein_signaling_Pathway_(Pathway_positive_regulation_of_gene_specific_transcription_via_TOR1A_SNCA_FKBP1A_STUB1) - NCI 1.2	0.535563	0.502534
NAD_ide_novoi_biosynthesis - Metabolism 1.4	0.451523	0.495086
cholesterol_biosynthesis_I - Metabolism 1.4	0.545674	0.493695
cholesterol_biosynthesis_II_via_2425-dihydrolanosterol - Metabolism 1.4	0.545674	0.493695
cholesterol_biosynthesis_III_via_desmosterol - Metabolism 1.4	0.545674	0.493695
KEGG_Peroxisome_Main_Pathway - KEGG Adjusted 1.5	0.512303	0.491137
KEGG_Type_I_diabetes_mellitus_Main_Pathway - KEGG Adjusted 1.5	0.365366	0.490778
NCI_Integrins_in_angiogenesis_Main_Pathway - NCI 1.2	0.474161	0.490176
NCI_EPO_signaling_Main_Pathway - NCI 1.2	0.484827	0.489471
biocarta_inhibition_of_cellular_proliferation_by_gleevec_Main_Pathway - Biocarta 1.2	0.453192	0.48879
NCI_Nongenotropic_Androgen_signaling_Pathway_(cell_proliferation) - NCI 1.2	0.531639	0.48633
NCI_ALK1_signaling_events_Main_Pathway - NCI 1.2	0.488527	0.48339
KEGG_Ubiquitin_mediated_proteolysis_Main_Pathway - KEGG Adjusted 1.5	0.511198	0.479428
biocarta_keratinocyte_differentiation_Pathway_(keratinocyte_differentiation) - Biocarta 1.2	0.571793	0.478322
KEGG_Axon_guidance_Main_Pathway - KEGG Adjusted 1.5	0.41058	0.477589
NCI_LKB1_signaling_events_Pathway_(establishment_of_cell_polarity) - NCI 1.2	0.483541	0.47757
dermatan_sulfate_biosynthesis - Metabolism 1.4	0.473926	0.476044
heparan_sulfate_biosynthesis - Metabolism 1.4	0.493227	0.474317
KEGG_p53_signaling_Main_Pathway - KEGG Adjusted 1.5	0.500608	0.473346
IGF1R_Signaling_Pathway_Apoptosis - Primary 1.4	0.469925	0.473141
KEGG_Amino_sugar_and_nucleotide_sugar_metabolism_Main_Pathway - KEGG Adjusted 1.5	0.457758	0.472404
NCI_Notch_signaling_Pathway_(oligodendrocyte_development) - NCI 1.2	0.466773	0.471139
NCI_Integrins_in_angiogenesis_Pathway_(angiogenesis) - NCI 1.2	0.416884	0.469505
KEGG_Thyroid_hormone_signaling_Main_Pathway - KEGG Adjusted 1.5	0.481226	0.460932
Cytoskeleton_Reorganization - Cytoskeleton 1.2	0.456297	0.458925
NCI_Notch_signaling_Pathway_(Bergmann_glial_cell_differentiation) - NCI 1.2	0.439088	0.458314
biocarta_rho_selective_guanine_exchange_factor_akap13_mediates_stress_fiber_formation_Main_Pathway - Biocarta 1.2	0.488217	0.456106
NCI_Nongenotropic_Androgen_signaling_Main_Pathway - NCI 1.2	0.488913	0.454571
NCI_Nongenotropic_Androgen_signaling_Pathway_(apoptosis) - NCI 1.2	0.49901	0.453535
NCI_N_cadherin_signaling_events_Main_Pathway - NCI 1.2	0.451867	0.45227
IGF1R_Signaling_Pathway_Gene_Expression_Proliferation_Growth_Survival_via_NFAT5_CREB3 - Primary 1.4	0.424487	0.450511
biocarta_mcalpain_and_friends_in_cell_motility_Main_Pathway - Biocarta 1.2	0.428561	0.449068
KEGG_Glycosaminoglycan_biosynthesis_keratan_sulfate_Main_Pathway - KEGG Adjusted 1.5	0.436222	0.446973
KEGG_Renin_angiotensin_system_Main_Pathway - KEGG Adjusted 1.5	0.420457	0.446534
KEGG_Salivary_secretion_Main_Pathway - KEGG Adjusted 1.5	0.45095	0.445442
NCI_Neurotrophic_factor_mediated_Trk_receptor_signaling_Pathway_(MAPKKK_cascade) - NCI 1.2	0.419192	0.445237
KEGG_Osteoclast_differentiation_Main_Pathway - KEGG Adjusted 1.5	0.461222	0.443673
NCI_Signaling_events_mediated_by_TCPTP_Pathway_(G1_S_transition_of_mitotic_cell_cycle) - NCI 1.2	0.443947	0.442353
NCI_Signaling_events_mediated_by_TCPTP_Pathway_(MAPKKK_cascade) - NCI 1.2	0.443947	0.442353
NCI_Alpha_synuclein_signaling_Pathway_(neuron_apoptosis) - NCI 1.2	0.460041	0.440131
NCI_Nephrin_Neph1_signaling_in_the_kidney_podocyte_Main_Pathway - NCI 1.2	0.401107	0.439706
NCI_Signaling_events_regulated_by_Ret_tyrosine_kinase_Pathway_(lamellipodium_assembly) - NCI 1.2	0.420806	0.437938
KEGG_Retinol_metabolism_Main_Pathway - KEGG Adjusted 1.5	0.424025	0.435851
Development_of_Immune_Synapse - Cytoskeleton 1.2	0.466585	0.432752
KEGG_Tyrosine_metabolism_Main_Pathway - KEGG Adjusted 1.5	0.42913	0.432715
KEGG_Collecting_duct_acid_secretion_Main_Pathway - KEGG Adjusted 1.5	0.446935	0.43069
KEGG_Aldosterone_regulated_sodium_reabsorption_Main_Pathway - KEGG Adjusted 1.5	0.367897	0.429887
NCI_Signaling_events_mediated_by_TCPTP_Pathway_(positive_regulation_of_S_phase_of_mitotic_cell_cycle) - NCI 1.2	0.45058	0.429289
IGF1R_Signaling_Pathway_Cell_Migration - Primary 1.4	0.457141	0.429266
NCI_BCR_signaling_Pathway_(cytokine_secretion) - NCI 1.2	0.39936	0.428916
D-imyoi-inositol_145-trisphosphate_biosynthesis - Metabolism 1.4	0.408655	0.427469
gamma-linolenate_biosynthesis - Metabolism 1.4	0.408188	0.427255
heparan_sulfate_biosynthesis_late_stages - Metabolism 1.4	0.451362	0.42339
UTP_and_CTP_ide_novoi_biosynthesis - Metabolism 1.4	0.49676	0.423348
biocarta_il_3_signaling_Main_Pathway - Biocarta 1.2	0.433756	0.423087
NCI_Aurora_A_signaling_Pathway_(spindle_assembly) - NCI 1.2	0.469702	0.421215
Ras_Pathway - Primary 1.4	0.373141	0.420193
NCI_Aurora_A_signaling_Pathway_(centrosome_duplication) - NCI 1.2	0.477418	0.419717
NCI_N_cadherin_signaling_events_Pathway_(regulation_of_cell_cell_adhesion) - NCI 1.2	0.380202	0.419629
KEGG_Insulin_secretion_Main_Pathway - KEGG Adjusted 1.5	0.416552	0.417454
NCI_Signaling_events_mediated_by_focal_adhesion_kinase_Pathway_(negative_regulation_of_cell_adhesion_involved_in_substrate_bound_cell_migration) - NCI 1.2	0.429768	0.415354
NCI_LPA_receptor_mediated_events_Pathway_(cAMP_biosynthetic_process) - NCI 1.2	0.467493	0.415335
CDP-diacylglycerol_biosynthesis - Metabolism 1.4	0.39319	0.413347
NCI_Signaling_events_mediated_by_Stem_cell_factor_receptor_c_Kit__Main_Pathway - NCI 1.2	0.418109	0.412479
KEGG_Dilated_cardiomyopathy_Main_Pathway - KEGG Adjusted 1.5	0.39218	0.41141
KEGG_Hypertrophic_cardiomyopathy_HCM__Main_Pathway - KEGG Adjusted 1.5	0.39218	0.41141
NCI_Beta3_integrin_cell_surface_interactions_Main_Pathway - NCI 1.2	0.383901	0.411107
KEGG_Lysosome_Main_Pathway - KEGG Adjusted 1.5	0.437067	0.409758
NCI_EPHA_forward_signaling_Main_Pathway - NCI 1.2	0.358491	0.404493
KEGG_Alcoholism_Main_Pathway - KEGG Adjusted 1.5	0.386518	0.404092
Ras_Pathway_Increased_T-cell_Adhesion - Primary 1.4	0.441358	0.401768
CMP_phosphorylation - Metabolism 1.4	0.471285	0.401142
CXC_Chemokine_Receptor_Pathway - Cytoskeleton 1.2	0.384492	0.398884
biocarta_regulation_of_ck1_cdk5_by_type_1_glutamate_receptors_Main_Pathway - Biocarta 1.2	0.476904	0.39733
NCI_LKB1_signaling_events_Pathway_(Pathway_positive_regulation_of_CREB_transcription_factor_activity_via_CRTC2) - NCI 1.2	0.39612	0.395467
NCI_Arf6_trafficking_events_Pathway_(cell_adhesion_mediated_by_integrin) - NCI 1.2	0.4185	0.394893
NCI_EPHA_forward_signaling_Pathway_(axon_guidance) - NCI 1.2	0.413654	0.393012
NCI_Notch_signaling_Main_Pathway - NCI 1.2	0.366299	0.391645
KEGG_Protein_export_Main_Pathway - KEGG Adjusted 1.5	0.24714	0.389797
IL-10_Pathway_IL-10_Responsive_Genes_Transcription_of_BCLXL_Cyclin-D1_D2_D3_Pim1_c-Myc_and_P19(INK4D)_via_STAT3 - Primary 1.4	0.382416	0.387361
IL-10_Pathway_Inflammatory_Cytokine_Genes_Expression_via_STAT3 - Primary 1.4	0.382416	0.387361
KEGG_Propanoate_metabolism_Main_Pathway - KEGG Adjusted 1.5	0.255986	0.386885
NCI_Arf6_signaling_events_Main_Pathway - NCI 1.2	0.389566	0.386805
KEGG_Fc_epsilon_RI_signaling_Main_Pathway - KEGG Adjusted 1.5	0.483168	0.384724
HGF_Pathway_Cell_Adhesion_and_Cell_Migration - Primary 1.4	0.425452	0.384336
NCI_N_cadherin_signaling_events_Pathway_(actin_filament_polymerization) - NCI 1.2	0.348666	0.384042
HGF_Pathway_Cell_Cycle_Progression - Primary 1.4	0.414405	0.3819
KEGG_Pantothenate_and_CoA_biosynthesis_Main_Pathway - KEGG Adjusted 1.5	0.391519	0.380757
KEGG_Sphingolipid_metabolism_Main_Pathway - KEGG Adjusted 1.5	0.415976	0.380537
IL-2_Pathway - Primary 1.4	0.398953	0.380211
KEGG_Acute_myeloid_leukemia_Main_Pathway - KEGG Adjusted 1.5	0.371769	0.377289
KEGG_Leukocyte_transendothelial_migration_Main_Pathway - KEGG Adjusted 1.5	0.357181	0.376771
NCI_Signaling_events_mediated_by_TCPTP_Pathway_(regulation_of_gluconeogenesis) - NCI 1.2	0.389597	0.375926
NCI_Netrin_mediated_signaling_events_Main_Pathway - NCI 1.2	0.369379	0.371605
adenosine_ribonucleotides_ide_novoi_biosynthesis - Metabolism 1.4	0.423879	0.370937
KEGG_Gap_junction_Main_Pathway - KEGG Adjusted 1.5	0.343886	0.369911
HGF_Pathway_Gene_Expression_via_JUN_STAT3_FOS_ELK1_ETS2 - Primary 1.4	0.36192	0.367978
bile_acid_biosynthesis_neutral_pathway - Metabolism 1.4	0.344179	0.366868
biocarta_map_kinase_inactivation_of_smrt_corepressor_Main_Pathway - Biocarta 1.2	0.377655	0.365678
NCI_EPHA_forward_signaling_Pathway_(cell_cell_adhesion) - NCI 1.2	0.362852	0.365258
NCI_EPHA_forward_signaling_Pathway_(regulation_of_stress_fiber_assembly) - NCI 1.2	0.362852	0.365258
biocarta_role_of_mef2d_in_t_cell_apoptosis_Main_Pathway - Biocarta 1.2	0.16622	0.364487
IGF1R_Signaling_Pathway - Primary 1.4	0.36252	0.364455
TRAF_Pathway_Direct_Antimicrobial_Response_and_Cell-Mediated_Immunity_and_Apoptosis_of_Host_Cell - Primary 1.4	0.308329	0.363437
NCI_EPHA_forward_signaling_Pathway_(proteasomal_ubiquitin_dependent_protein_catabolic_process) - NCI 1.2	0.378977	0.362803
NCI_Signaling_events_mediated_by_the_Hedgehog_family_Pathway_(receptor_mediated_endocytosis) - NCI 1.2	0.367326	0.362541
NCI_Endothelins_Main_Pathway - NCI 1.2	0.3461	0.361589
NCI_LKB1_signaling_events_Main_Pathway - NCI 1.2	0.380635	0.358318
KEGG_GABAergic_synapse_Main_Pathway - KEGG Adjusted 1.5	0.355542	0.357496
RANK_Signaling_in_Osteoclasts_Pathway_Resorption - Primary 1.4	0.341118	0.356824
biocarta_il_7_signal_transduction_Main_Pathway - Biocarta 1.2	0.496533	0.356166
KEGG_VEGF_signaling_Main_Pathway - KEGG Adjusted 1.5	0.377531	0.355905
KEGG_Nicotinate_and_nicotinamide_metabolism_Main_Pathway - KEGG Adjusted 1.5	0.321169	0.355461
KEGG_Arachidonic_acid_metabolism_Main_Pathway - KEGG Adjusted 1.5	0.389665	0.353898
fatty_acid_beta-oxidation_peroxisome - Metabolism 1.4	0.427995	0.353553
NCI_Signaling_events_mediated_by_TCPTP_Pathway_(macrophage_differentiation) - NCI 1.2	0.371084	0.351961
NCI_E_cadherin_signaling_in_keratinocytes_Main_Pathway - NCI 1.2	0.327228	0.351238
TNF_Signaling_Pathway_Apoptosis - Primary 1.4	0.385342	0.348802
NCI_ErbB1_downstream_signaling_Pathway_(cell_proliferation) - NCI 1.2	0.340629	0.348787
NCI_ATM_Main_Pathway - NCI 1.2	0.450046	0.348293
glutathione-mediated_detoxification - Metabolism 1.4	0.141286	0.347961
HGF_Pathway_Anoikis - Primary 1.4	0.397191	0.347336
KEGG_Bacterial_invasion_of_epithelial_cells_Main_Pathway - KEGG Adjusted 1.5	0.343975	0.346384
HGF_Pathway_Cell_Scattering - Primary 1.4	0.392805	0.345395
HGF_Pathway_Cell_Survival - Primary 1.4	0.392805	0.345395
biocarta_il_6_signaling_Main_Pathway - Biocarta 1.2	0.488775	0.345189
NCI_E_cadherin_signaling_in_keratinocytes_Pathway_(keratinocyte_differentiation) - NCI 1.2	0.340419	0.343887
CDK5_Signaling_in_Neurons - Cytoskeleton 1.2	0.378718	0.34371
KEGG_Adipocytokine_signaling_Main_Pathway - KEGG Adjusted 1.5	0.312303	0.342641
KEGG_Spliceosome_Main_Pathway - KEGG Adjusted 1.5	0.3686	0.34224
SMAD_Signaling_Network_Pathway - Primary 1.4	0.267392	0.342221
HMGB1_signaling_through_RAGE - Cytoskeleton 1.2	0.317609	0.339365
NCI_Endothelins_Pathway_(cAMP_biosynthetic_process) - NCI 1.2	0.378944	0.337293
KEGG_Wnt_signaling_Main_Pathway - KEGG Adjusted 1.5	0.337133	0.334511
NCI_Signaling_events_mediated_by_HDAC_Class_I_Main_Pathway - NCI 1.2	0.382106	0.333615
KEGG_Ras_signaling_Main_Pathway - KEGG Adjusted 1.5	0.341325	0.332121
NCI_Aurora_B_signaling_Main_Pathway - NCI 1.2	0.392462	0.331025
NCI_Internalization_of_ErbB1_Main_Pathway - NCI 1.2	0.326972	0.328789
NCI_Signaling_events_mediated_by_focal_adhesion_kinase_Pathway_(cell_migration) - NCI 1.2	0.296766	0.328355
IL-2_Pathway_Apoptosis_Inhibition - Primary 1.4	0.364886	0.326624
biocarta_regulators_of_bone_mineralization_Main_Pathway - Biocarta 1.2	0.331652	0.326134
Chemotaxis_Driven_by_CCR4 - Cytoskeleton 1.2	0.340775	0.32521
Chemotaxis_of_Immune_Cells_During_Allergic_Asthma_and_Eczema_Driven_by_CCR4 - Cytoskeleton 1.2	0.340775	0.32521
NCI_ALK1_signaling_events_Pathway_(endothelial_cell_proliferation) - NCI 1.2	0.304487	0.325056
NCI_ErbB2_ErbB3_signaling_events_Pathway_(myelination) - NCI 1.2	0.305772	0.322358
Cell_Adhesion_Regulated_by_CDHs - Cytoskeleton 1.2	0.321667	0.321667
biocarta_internal_ribosome_entry_Main_Pathway - Biocarta 1.2	0.385095	0.321285
biocarta_internal_ribosome_entry_Pathway_(translational_initiation) - Biocarta 1.2	0.385095	0.321285
Ras_Pathway_Gene_Expression_Cell_Proliferation_Cell_Survival_Differentiation_Development_Cell_Cycle_Control_Cell_Motility_Tumorigenesis_via_ELK4_ATF2_MEF2D_STAT2_CREB3_CCNA1_MYC_ELK1_JUN_CDK4 - Primary 1.4	0.373297	0.321261
NCI_Endogenous_TLR_signaling_Pathway_(regulation_of_apoptosis) - NCI 1.2	0.336003	0.318909
NCI_Endogenous_TLR_signaling_Pathway_(regulation_of_cell_proliferation) - NCI 1.2	0.336003	0.318909
NCI_Endogenous_TLR_signaling_Pathway_(regulation_of_interleukin_1_beta_production) - NCI 1.2	0.336003	0.318909
NCI_Ephrin_B_reverse_signaling_Pathway_(angiogenesis) - NCI 1.2	0.343295	0.3182
NCI_Ephrin_B_reverse_signaling_Pathway_(endothelial_cell_migration) - NCI 1.2	0.343295	0.3182
TRAF_Pathway_Apoptosis - Primary 1.4	0.369008	0.316837
KEGG_Tight_junction_Main_Pathway - KEGG Adjusted 1.5	0.304441	0.316767
NCI_Ephrin_B_reverse_signaling_Pathway_(cell_adhesion) - NCI 1.2	0.329033	0.314377
Calcium2+_Signaling - Cytoskeleton 1.2	0.317058	0.314065
ATM_Pathway_G2-Mitosis_progression - Primary 1.4	0.40657	0.313262
ATM_Pathway_G2_M_Checkpoint_Arrest - Primary 1.4	0.40657	0.313262
KEGG_Endocytosis_Main_Pathway - KEGG Adjusted 1.5	0.305414	0.312861
KEGG_Protein_processing_in_endoplasmic_reticulum_Main_Pathway - KEGG Adjusted 1.5	0.302644	0.312156
NCI_Aurora_A_signaling_Pathway_(protein_catabolic_process) - NCI 1.2	0.339541	0.307643
biocarta_role_of_erk5_in_neuronal_survival_Pathway_(cell_survival) - Biocarta 1.2	0.280878	0.306966
KEGG_Selenocompound_metabolism_Main_Pathway - KEGG Adjusted 1.5	0.246125	0.305407
NCI_Signaling_events_mediated_by_the_Hedgehog_family_Main_Pathway - NCI 1.2	0.301437	0.305025
KEGG_Glycosphingolipid_biosynthesis_globo_series_Main_Pathway - KEGG Adjusted 1.5	0.298679	0.304422
KEGG_Glutamatergic_synapse_Main_Pathway - KEGG Adjusted 1.5	0.306956	0.303419
biocarta_insulin_signaling_Main_Pathway - Biocarta 1.2	0.263088	0.299961
NCI_Signaling_events_mediated_by_PTP1B_Main_Pathway - NCI 1.2	0.269429	0.299037
KEGG_Arginine_and_proline_metabolism_Main_Pathway - KEGG Adjusted 1.5	0.273187	0.298995
TGF-Beta_Pathway_Epithelial_Mesenchymal_Transdifferentiation - Primary 1.4	0.345772	0.298785
NCI_ALK2_signaling_events_Main_Pathway - NCI 1.2	0.293985	0.29871
FCGR3A-mediated_phagocytosis - Cytoskeleton 1.2	0.338825	0.298304
KEGG_Morphine_addiction_Main_Pathway - KEGG Adjusted 1.5	0.413702	0.297856
NCI_Signaling_events_mediated_by_VEGFR1_and_VEGFR2_Pathway_(cell_proliferation) - NCI 1.2	0.449107	0.297525
STAT3_Pathway - Primary 1.4	0.315947	0.296843
RANK_Signaling_in_Osteoclasts_Pathway_Inhibition_of_Death - Primary 1.4	0.298406	0.296442
KEGG_Pentose_phosphate_Main_Pathway - KEGG Adjusted 1.5	0.300275	0.296391
Ephrin-mediated_Signaling_Events_During_Cell_Adhesion - Cytoskeleton 1.2	0.288782	0.295252
ATM_Pathway_Cell_Survival - Primary 1.4	0.289877	0.294813
KEGG_Hepatitis_C_Main_Pathway - KEGG Adjusted 1.5	0.277383	0.294034
KEGG_Transcriptional_misregulation_in_cancer_Main_Pathway - KEGG Adjusted 1.5	0.317135	0.293614
NCI_EPHA2_forward_signaling_Main_Pathway - NCI 1.2	0.320113	0.292419
NCI_Ephrin_B_reverse_signaling_Main_Pathway - NCI 1.2	0.283069	0.292419
NCI_Signaling_events_mediated_by_TCPTP_Main_Pathway - NCI 1.2	0.329163	0.291425
KEGG_Neurotrophin_signaling_Main_Pathway - KEGG Adjusted 1.5	0.341496	0.290944
FAK_Pathway - Cytoskeleton 1.2	0.263882	0.290771
TGF-Beta_Pathway - Primary 1.4	0.271743	0.288186
NCI_Sphingosine_1_phosphate_S1P_Main_Pathway - NCI 1.2	0.320949	0.287546
TNF_Signaling_Pathway - Primary 1.4	0.23733	0.287509
D-imyoi-inositol_145-trisphosphate_degradation - Metabolism 1.4	0.248805	0.286641
Hedgehog_Signaling_in_Mammals_Pathway - Primary 1.4	0.300762	0.286482
NCI_N_cadherin_signaling_events_Pathway_(myoblast_differentiation) - NCI 1.2	0.336857	0.286044
KEGG_RNA_polymerase_Main_Pathway - KEGG Adjusted 1.5	0.254154	0.285652
3-phosphoinositide_degradation - Metabolism 1.4	0.275314	0.283061
NCI_Endogenous_TLR_signaling_Main_Pathway - NCI 1.2	0.3279	0.28301
IL-10_Pathway - Primary 1.4	0.279531	0.282819
KEGG_Gastric_acid_secretion_Main_Pathway - KEGG Adjusted 1.5	0.37282	0.281078
Akt_Signaling_Pathway_Cell_Survival - Primary 1.4	0.31678	0.279897
NCI_E_cadherin_signaling_in_the_nascent_adherens_junction_Main_Pathway - NCI 1.2	0.274634	0.279024
KEGG_Melanoma_Main_Pathway - KEGG Adjusted 1.5	0.271138	0.277494
NCI_E_cadherin_signaling_in_keratinocytes_Pathway_(apoptosis) - NCI 1.2	0.303052	0.275995
biocarta_oxidative_stress_induced_gene_expression_via_nrf2_Main_Pathway - Biocarta 1.2	0.210566	0.275977
TRAF_Pathway_Cell_Survival - Primary 1.4	0.305036	0.274553
KEGG_Legionellosis_Main_Pathway - KEGG Adjusted 1.5	0.336433	0.274007
NCI_Neurotrophic_factor_mediated_Trk_receptor_signaling_Main_Pathway - NCI 1.2	0.246528	0.27376
NCI_ErbB1_downstream_signaling_Pathway_(ruffle_organization) - NCI 1.2	0.30706	0.272743
FN1_Influence_on_Cell_Motility_via_Integrins - Cytoskeleton 1.2	0.302615	0.272663
NCI_Signaling_events_mediated_by_focal_adhesion_kinase_Main_Pathway - NCI 1.2	0.280316	0.271492
NCI_Nectin_adhesion_Main_Pathway - NCI 1.2	0.289561	0.267618
IGF1R_Signaling_Pathway_Protein_Synthesis - Primary 1.4	0.268228	0.266461
biocarta_stathmin_and_breast_cancer_resistance_to_antimicrotubule_agents_Main_Pathway - Biocarta 1.2	0.368099	0.266083
KEGG_Progesterone_mediated_oocyte_maturation_Main_Pathway - KEGG Adjusted 1.5	0.340027	0.264795
biocarta_regulation_of_bad_phosphorylation_Main_Pathway - Biocarta 1.2	0.30694	0.263044
Gamma-Aminobutyric_Acid_A_Receptor_Pathway - Cytoskeleton 1.2	0.265386	0.261117
AHR_Pathway - Primary 1.4	0.271141	0.260664
Ras_Pathway_Apoptosis - Primary 1.4	0.234948	0.260412
CCR3_Pathway_in_Eosinophils - Cytoskeleton 1.2	0.277931	0.25792
NCI_Neurotrophic_factor_mediated_Trk_receptor_signaling_Pathway_(neuron_projection_morphogenesis) - NCI 1.2	0.254202	0.256459
biocarta_keratinocyte_differentiation_Main_Pathway - Biocarta 1.2	0.291674	0.255493
biocarta_il_4_signaling_Main_Pathway - Biocarta 1.2	0.280184	0.252959
TGF-Beta_Pathway_Post_Transciptional_G1_Arrest - Primary 1.4	0.336334	0.252646
chondroitin_sulfate_biosynthesis - Metabolism 1.4	0.295858	0.249359
Chemotaxis_Driven_by_C5a - Cytoskeleton 1.2	0.242348	0.249249
Hedgehog_Signaling_in_Mammals_no_Tubulin_Pathway - Primary 1.4	0.242942	0.248609
CDC42_Pathway - Cytoskeleton 1.2	0.237818	0.2432
NCI_ErbB1_downstream_signaling_Main_Pathway - NCI 1.2	0.263212	0.242015
3-phosphoinositide_biosynthesis - Metabolism 1.4	0.270872	0.24152
NCI_Signaling_events_regulated_by_Ret_tyrosine_kinase_Main_Pathway - NCI 1.2	0.233449	0.239877
KEGG_Steroid_biosynthesis_Main_Pathway - KEGG Adjusted 1.5	0.334103	0.239732
Ubiquitin-Proteasome_Dependent_Proteolysis_Pathway - Primary 1.4	0.283982	0.235084
VEGF_Pathway - Primary 1.4	0.257226	0.233684
biocarta_integrin_signaling_Main_Pathway - Biocarta 1.2	0.242813	0.232251
TGF-Beta_Pathway_Transciption_Arrested_Growth_Apoptosis - Primary 1.4	0.243882	0.229922
TGF-Beta_Pathway_Transciption_Cell_Growth_and_Mobility_and_Angiogenesis - Primary 1.4	0.243882	0.229922
KEGG_Pathogenic_Escherichia_coli_infection_Main_Pathway - KEGG Adjusted 1.5	0.274613	0.226683
NCI_ErbB2_ErbB3_signaling_events_Main_Pathway - NCI 1.2	0.218523	0.224859
STAT3_Pathway_Growth_Arrest_and_Differentiation - Primary 1.4	0.209987	0.222908
KEGG_Complement_and_coagulation_cascades_Main_Pathway - KEGG Adjusted 1.5	0.223319	0.222208
biocarta_mechanisms_of_transcriptional_repression_by_dna_methylation_Main_Pathway - Biocarta 1.2	0.244382	0.222054
biocarta_mechanisms_of_transcriptional_repression_by_dna_methylation_Pathway_(histone_deacetylation) - Biocarta 1.2	0.244382	0.222054
ATM_Pathway - Primary 1.4	0.216465	0.220546
NCI_Arf6_trafficking_events_Pathway_(calcium_ion_dependent_exocytosis) - NCI 1.2	0.247124	0.220397
NCI_Signaling_events_mediated_by_VEGFR1_and_VEGFR2_Main_Pathway - NCI 1.2	0.207657	0.220392
KEGG_Phagosome_Main_Pathway - KEGG Adjusted 1.5	0.201639	0.21944
biocarta_melanocyte_development_and_pigmentation_Main_Pathway - Biocarta 1.2	0.172757	0.219412
TCA_cycle - Metabolism 1.4	0.249216	0.217261
KEGG_alpha_Linolenic_acid_metabolism_Main_Pathway - KEGG Adjusted 1.5	0.177982	0.216463
KEGG_Linoleic_acid_metabolism_Main_Pathway - KEGG Adjusted 1.5	0.177982	0.216463
NCI_Signaling_mediated_by_p38_alpha_and_p38_beta_Main_Pathway - NCI 1.2	0.223528	0.21531
NCI_BARD1_signaling_events_Main_Pathway - NCI 1.2	0.251067	0.213
CDK5_Pathway_in_Central_Nervous_System - Cytoskeleton 1.2	0.252289	0.211571
NCI_LPA_receptor_mediated_events_Main_Pathway - NCI 1.2	0.240628	0.211366
biocarta_induction_of_apoptosis_through_dr3_and_dr4_5_death_receptors_Main_Pathway - Biocarta 1.2	0.264287	0.21089
biocarta_proteasome_complex_Pathway_(Pathway_degradation_of_PSMA1) - Biocarta 1.2	0.207852	0.21061
KEGG_Glycerophospholipid_metabolism_Main_Pathway - KEGG Adjusted 1.5	0.295544	0.210246
biocarta_mets_affect_on_macrophage_differentiation_Main_Pathway - Biocarta 1.2	0.145516	0.209107
NCI_Arf6_trafficking_events_Pathway_(clathrin_coat_assembly) - NCI 1.2	0.217098	0.20725
biocarta_hypoxia_inducible_factor_in_the_cardivascular_system_Main_Pathway - Biocarta 1.2	0.208152	0.206578
NCI_Arf1_Main_Pathway - NCI 1.2	0.214905	0.205131
KEGG_Basal_transcription_factors_Main_Pathway - KEGG Adjusted 1.5	0.210453	0.204095
IL-10_Pathway_Translational_Modulation - Primary 1.4	0.248755	0.203969
KEGG_Folate_biosynthesis_Main_Pathway - KEGG Adjusted 1.5	0.195842	0.202937
Ras_Pathway_Golgi_Trafficking_and_Vesicle_Formation - Primary 1.4	0.208567	0.202471
KEGG_Chronic_myeloid_leukemia_Main_Pathway - KEGG Adjusted 1.5	0.246782	0.201295
NCI_Signaling_events_mediated_by_VEGFR1_and_VEGFR2_Pathway_(regulation_of_vascular_permeability) - NCI 1.2	0.234825	0.199353
Akt_Signaling_Pathway_Aggregation_and_Neurodegeneration - Primary 1.4	0.275562	0.198205
biocarta_hiv_1_nef_negative_effector_of_fas_and_tnf_Pathway_(Pathway_protein_ubiquitination_of_CHUK) - Biocarta 1.2	0.15482	0.196796
NCI_Lissencephaly_gene_LIS1_in_neuronal_migration_and_development_Main_Pathway - NCI 1.2	0.245962	0.196212
Ephrin-B_Pathway - Cytoskeleton 1.2	0.240476	0.192754
biocarta_influence_of_ras_and_rho_proteins_on_g1_to_s_transition_Main_Pathway - Biocarta 1.2	0.185113	0.190612
Akt_Signaling_Pathway_Enhancement_of_Breast_Epithelial - Primary 1.4	0.192013	0.18916
Chemotaxis_Driven_by_CCL2 - Cytoskeleton 1.2	0.175667	0.186019
biocarta_induction_of_apoptosis_through_dr3_and_dr4_5_death_receptors_Pathway_(apoptosis) - Biocarta 1.2	0.267884	0.183807
KEGG_Pertussis_Main_Pathway - KEGG Adjusted 1.5	0.15601	0.183256
NCI_Signaling_events_mediated_by_VEGFR1_and_VEGFR2_Pathway_(angiogenesis) - NCI 1.2	0.221595	0.181296
Chemotaxis_Driven_by_IL-8_and_LTB4 - Cytoskeleton 1.2	0.208576	0.181114
TRAF_Pathway - Primary 1.4	0.177578	0.181114
biocarta_role_of_erbb2_in_signal_transduction_and_oncology_Main_Pathway - Biocarta 1.2	0.261806	0.178062
Akt_Signaling_Pathway_Blocks_Apoptosis - Primary 1.4	0.208766	0.176144
Ras_Pathway_Cell-Cell_Junctions - Primary 1.4	0.195238	0.174053
biocarta_nfkb_activation_by_nontypeable_hemophilus_influenzae_Main_Pathway - Biocarta 1.2	0.148213	0.173348
NCI_Notch_mediated_HES_HEY_network_Main_Pathway - NCI 1.2	0.126949	0.172602
Akt_Signaling_Pathway_JNK_mediated_apoptosis - Primary 1.4	0.226224	0.171379
Akt_Signaling_Pathway_ERK_mediated_apoptosis - Primary 1.4	0.190253	0.171192
Akt_Pathway_Regulation_by_GH - Cytoskeleton 1.2	0.178907	0.170875
biocarta_induction_of_apoptosis_through_dr3_and_dr4_5_death_receptors_Pathway_(Pathway_degradation_of_CASP3_CASP10_CASP10) - Biocarta 1.2	0.215181	0.17073
IL-2_Pathway_Gene_Expression_via_FYN_LYN_RPS6KB1_PTK2B - Primary 1.4	0.32851	0.169465
biocarta_mapkinase_signaling_Main_Pathway - Biocarta 1.2	0.200913	0.168187
AHR_Pathway_C-myc_expression_via_RELA - Primary 1.4	0.166277	0.168149
KEGG_Endometrial_cancer_Main_Pathway - KEGG Adjusted 1.5	0.210957	0.166889
NCI_Signaling_events_mediated_by_Hepatocyte_Growth_Factor_Receptor_c_Met__Main_Pathway - NCI 1.2	0.212903	0.164672
KEGG_Colorectal_cancer_Main_Pathway - KEGG Adjusted 1.5	0.276014	0.16386
Akt_Signaling_Pathway_Induction_of_Chromatin_Condensation - Primary 1.4	0.197072	0.163627
Akt_Signaling_Pathway_Cell_Cycle_Progression - Primary 1.4	0.174263	0.163422
NCI_Signaling_events_mediated_by_HDAC_Class_I_Pathway_(histone_deacetylation) - NCI 1.2	0.212003	0.161443
NCI_Neurotrophic_factor_mediated_Trk_receptor_signaling_Pathway_(Schwann_cell_development) - NCI 1.2	0.232316	0.157508
KEGG_PPAR_signaling_Main_Pathway - KEGG Adjusted 1.5	0.0729322	0.155876
KEGG_Fanconi_anemia_Main_Pathway - KEGG Adjusted 1.5	0.283015	0.154064
KEGG_Glyoxylate_and_dicarboxylate_metabolism_Main_Pathway - KEGG Adjusted 1.5	0.127231	0.15146
AHR_Pathway_Cath_D_expression_via_SP1 - Primary 1.4	0.165884	0.145094
TNF_Signaling_Pathway_Gene_Expression_and_Cell_Survival_via_FOS_NFKB2_JUN_ELK1_ATF6 - Primary 1.4	0.158345	0.144483
AHR_Pathway_PS2_Gene_expression_via_ESR1 - Primary 1.4	0.146959	0.143937
Akt_Signaling_Pathway_NF-kB_pathway - Primary 1.4	0.121742	0.14158
biocarta_skeletal_muscle_hypertrophy_is_regulated_via_akt_mtor_Main_Pathway - Biocarta 1.2	0.167519	0.140539
ICOS_signaling_in_T-helper_cells - Cytoskeleton 1.2	0.118171	0.137435
TRAF_Pathway_Gene_Expression_via_FOS_JUN - Primary 1.4	0.171775	0.136768
Akt_Signaling_Pathway_Glycogen_Synthesis_and_Apoptosis - Primary 1.4	0.190095	0.133702
D-imyoi-inositol_134-trisphosphate_biosynthesis - Metabolism 1.4	0.155954	0.132087
Akt_Signaling_Pathway_Apoptosis - Primary 1.4	0.171593	0.124307
Akt_Signaling_Pathway_AR_mediated_apoptosis - Primary 1.4	0.171593	0.124307
Akt_Signaling_Pathway_Blood_cell_differentiation - Primary 1.4	0.171593	0.124307
Akt_Signaling_Pathway_Elevation_of_Glucose_Import - Primary 1.4	0.171593	0.124307
Akt_Signaling_Pathway_Genetic_Stability - Primary 1.4	0.171593	0.124307
Akt_Signaling_Pathway_NF-kB_dependent_transciption - Primary 1.4	0.171593	0.124307
NCI_AP_1_transcription_factor_network_Main_Pathway - NCI 1.2	0.143859	0.121931
NCI_Signaling_events_mediated_by_VEGFR1_and_VEGFR2_Pathway_(focal_adhesion_assembly) - NCI 1.2	0.0927162	0.121245
biocarta_keratinocyte_differentiation_Pathway_(apoptosis) - Biocarta 1.2	0.143236	0.119729
NCI_Signaling_events_mediated_by_PRL_Main_Pathway - NCI 1.2	0.201046	0.114711
biocarta_inactivation_of_gsk3_by_akt_causes_accumulation_of_b_catenin_in_alveolar_macrophages_Main_Pathway - Biocarta 1.2	0.122057	0.112966
HIF1Alpha_Pathway - Primary 1.4	0.0748822	0.112859
KEGG_TNF_signaling_Main_Pathway - KEGG Adjusted 1.5	0.154014	0.109433
1D-imyoi-inositol_hexakisphosphate_biosynthesis_II_mammalian - Metabolism 1.4	0.141795	0.106451
Angiotensin-PTK2B_Pathway - Cytoskeleton 1.2	0.068859	0.100407
NCI_Signaling_mediated_by_p38_gamma_and_p38_delta_Main_Pathway - NCI 1.2	0.194045	0.0988108
IGF1R_Signaling_Pathway_Cell_Proliferation_Diferentiation_and_Apoptosis - Primary 1.4	0.106867	0.0980221
biocarta_lissencephaly_gene_lis1_in_neuronal_migration_and_development_Pathway_(retrograde_axon_cargo_transport) - Biocarta 1.2	0.144068	0.096314
NCI_Beta2_integrin_cell_surface_interactions_Main_Pathway - NCI 1.2	0.0930164	0.0887393
NCI_CD40_CD40L_signaling_Main_Pathway - NCI 1.2	0.114514	0.0881746
biocarta_multi_step_regulation_of_transcription_by_pitx2_Main_Pathway - Biocarta 1.2	0.0770086	0.0873532
guanosine_nucleotides_ide_novoi_biosynthesis - Metabolism 1.4	0.175278	0.084945
Akt_Signaling_Pathway_Acetylation_of_proteins - Primary 1.4	0.113071	0.0836149
CD16_Pathway_in_Natural_Killer_cells - Cytoskeleton 1.2	0.124274	0.0834842
NCI_BARD1_signaling_events_Pathway_(DNA_repair) - NCI 1.2	0.142091	0.0832929
Chemokine_Ligand_2_Signaling - Cytoskeleton 1.2	0.0996812	0.0774124
FGFR_Signaling - Cytoskeleton 1.2	0.112794	0.0772584
HIF1Alpha_Pathway_p53_Hypoxia_Pathway - Primary 1.4	0.0295133	0.0759656
Akt_Signaling_Pathway_Increased_GLUT4_translocation - Primary 1.4	0.138362	0.0683256
NCI_E_cadherin_signaling_in_the_nascent_adherens_junction_Pathway_(regulation_of_actin_nucleation) - NCI 1.2	0.141699	0.0666502
HIF1Alpha_Pathway_Gene_Expression_via_JUN_CREB3 - Primary 1.4	0.0732534	0.0635886
HIF1Alpha_Pathway_NOS_Pathway - Primary 1.4	0.0610422	0.0556359
HIF1Alpha_Pathway_VEGF_Pathway - Primary 1.4	0.0610422	0.0556359
IGF1R_Signaling_Pathway_Cell_Survival - Primary 1.4	0.0675149	0.0551039
Akt_Signaling_Pathway_NFAT_degradation - Primary 1.4	0.0442659	0.0546605
biocarta_how_does_salmonella_hijack_a_cell_Pathway_(lamellipodium_assembly) - Biocarta 1.2	0.0673494	0.0531157
biocarta_role_of_pi3k_subunit_p85_in_regulation_of_actin_organization_and_cell_migration_Main_Pathway - Biocarta 1.2	0.0790507	0.0500448
KEGG_Bladder_cancer_Main_Pathway - KEGG Adjusted 1.5	0.107162	0.0451957
adenosine_deoxyribonucleotides_ide_novoi_biosynthesis - Metabolism 1.4	0.0444656	0.0305645
KEGG_Pancreatic_cancer_Main_Pathway - KEGG Adjusted 1.5	0.0602227	0.0236246
biocarta_lissencephaly_gene_lis1_in_neuronal_migration_and_development_Main_Pathway - Biocarta 1.2	0.0755639	0.0235499
HGF_Pathway_Regulation_of_Cytoskeleton_Cell_Polarity_and_Cell_Motility - Primary 1.4	0.0442147	0.0210857
KEGG_Hedgehog_signaling_Main_Pathway - KEGG Adjusted 1.5	0.0115735	-0.0112849
KEGG_Circadian_rhythm_Main_Pathway - KEGG Adjusted 1.5	-0.113596	-0.0617359
biocarta_lck_and_fyn_tyrosine_kinases_in_initiation_of_tcr_activation_Main_Pathway - Biocarta 1.2	NA	NA
chondroitin_sulfate_biosynthesis_late_stages - Metabolism 1.4	NA	NA
KEGG_Thyroid_hormone_synthesis_Main_Pathway - KEGG Adjusted 1.5	NA	NA

## Sheet: Uterine_Corpus_Endometrial_Carc
Pathway	Pearson	Spearman
Tumour_Infiltration_Pathway - Primary 1.4	0.816576	0.768969
NCI_Signaling_events_mediated_by_PTP1B_Main_Pathway - NCI 1.2	0.718286	0.744916
L-kynurenine_degradation - Metabolism 1.4	0.67721	0.735597
reactome_Interleukin_receptor_SHC_signaling_Main_Pathway - Reactome 1.3	0.723116	0.732662
NCI_N_cadherin_signaling_events_Pathway_(regulation_of_cell_cell_adhesion) - NCI 1.2	0.670746	0.728888
reactome_Pyrimidine_catabolism_Main_Pathway - Reactome 1.3	0.702171	0.726605
reactome_ISG15_antiviral_mechanism_Main_Pathway - Reactome 1.3	0.79286	0.7253
NCI_Aurora_A_signaling_Pathway_(protein_catabolic_process) - NCI 1.2	0.67261	0.719091
FCGR3A-mediated_phagocytosis - Cytoskeleton 1.2	0.65133	0.711508
ATM_Pathway_G2-Mitosis_progression - Primary 1.4	0.586162	0.707443
ATM_Pathway_G2_M_Checkpoint_Arrest - Primary 1.4	0.586162	0.707443
NCI_N_cadherin_signaling_events_Pathway_(actin_filament_polymerization) - NCI 1.2	0.6481	0.703681
Development_of_Immune_Synapse - Cytoskeleton 1.2	0.700337	0.702924
KEGG_Amino_sugar_and_nucleotide_sugar_metabolism_Main_Pathway - KEGG Adjusted 1.5	0.682648	0.699103
reactome_Activation_of_the_pre_replicative_complex_Main_Pathway - Reactome 1.3	0.690144	0.69668
reactome_Depolymerisation_of_the_Nuclear_Lamina_Main_Pathway - Reactome 1.3	0.637599	0.69548
reactome_Activation_of_ATR_in_response_to_replication_stress_Main_Pathway - Reactome 1.3	0.704961	0.693873
reactome_Interleukin_2_signaling_Main_Pathway - Reactome 1.3	0.677699	0.690751
NCI_Lissencephaly_gene_LIS1_in_neuronal_migration_and_development_Main_Pathway - NCI 1.2	0.670559	0.690553
reactome_Polymerase_switching_Main_Pathway - Reactome 1.3	0.69821	0.688992
reactome_Polymerase_switching_on_the_C_strand_of_the_telomere_Main_Pathway - Reactome 1.3	0.69821	0.688992
reactome_Purine_catabolism_Main_Pathway - Reactome 1.3	0.717333	0.688888
NAD_ide_novoi_biosynthesis - Metabolism 1.4	0.665272	0.684764
IGF1R_Signaling_Pathway_Gene_Expression_Proliferation_Growth_Survival_via_NFAT5_CREB3 - Primary 1.4	0.543529	0.682248
KEGG_Osteoclast_differentiation_Main_Pathway - KEGG Adjusted 1.5	0.654987	0.679348
biocarta_mechanism_of_protein_import_into_the_nucleus_Main_Pathway - Biocarta 1.2	0.68171	0.67654
reactome_Interaction_With_The_Zona_Pellucida_Main_Pathway - Reactome 1.3	0.725479	0.663995
reactome_Insulin_receptor_recycling_Main_Pathway - Reactome 1.3	0.628576	0.66325
reactome_Activation_of_gene_expression_by_SREBF_SREBP__Main_Pathway - Reactome 1.3	0.616198	0.662959
reactome_Smooth_Muscle_Contraction_Main_Pathway - Reactome 1.3	0.515634	0.661118
KEGG_Histidine_metabolism_Main_Pathway - KEGG Adjusted 1.5	0.610888	0.656913
KEGG_Arachidonic_acid_metabolism_Main_Pathway - KEGG Adjusted 1.5	0.65955	0.655877
adenosine_ribonucleotides_ide_novoi_biosynthesis - Metabolism 1.4	0.596268	0.652732
reactome_snRNP_Assembly_Main_Pathway - Reactome 1.3	0.657337	0.65173
D-imyoi-inositol_145-trisphosphate_degradation - Metabolism 1.4	0.614169	0.651369
NCI_N_cadherin_signaling_events_Main_Pathway - NCI 1.2	0.543523	0.644112
reactome_RIG_I_MDA5_mediated_induction_of_IFN_alpha_beta_pathways_Main_Pathway - Reactome 1.3	0.672719	0.640105
IL-2_Pathway - Primary 1.4	0.568593	0.63788
NCI_JNK_signaling_in_the_CD4_TCR_Main_Pathway - NCI 1.2	0.571223	0.628154
NCI_Aurora_A_signaling_Pathway_(spindle_assembly) - NCI 1.2	0.606322	0.628026
3-phosphoinositide_degradation - Metabolism 1.4	0.605147	0.626826
NCI_Aurora_A_signaling_Pathway_(centrosome_duplication) - NCI 1.2	0.651906	0.626791
NCI_Beta5_beta6_beta7_and_beta8_integrin_cell_surface_interactions_Main_Pathway - NCI 1.2	0.603783	0.626546
reactome_E2F_enabled_inhibition_of_pre_replication_complex_formation_Main_Pathway - Reactome 1.3	0.619304	0.624729
reactome_Synthesis_of_bile_acids_and_bile_salts_via_27_hydroxycholesterol_Main_Pathway - Reactome 1.3	0.698064	0.624589
KEGG_Legionellosis_Main_Pathway - KEGG Adjusted 1.5	0.560618	0.62184
biocarta_keratinocyte_differentiation_Main_Pathway - Biocarta 1.2	0.580707	0.621246
NCI_Aurora_B_signaling_Main_Pathway - NCI 1.2	0.609217	0.618987
reactome_Signaling_by_SCF_KIT_Main_Pathway - Reactome 1.3	0.649841	0.616238
biocarta_regulation_of_bad_phosphorylation_Main_Pathway - Biocarta 1.2	0.617791	0.614421
KEGG_Huntington_s_disease_Main_Pathway - KEGG Adjusted 1.5	0.658642	0.613605
NCI_EPO_signaling_Main_Pathway - NCI 1.2	0.520537	0.612301
VEGF_Pathway - Primary 1.4	0.548672	0.612277
reactome_Synthesis_of_Prostaglandins_PG_and_Thromboxanes_TX__Main_Pathway - Reactome 1.3	0.586385	0.610868
NCI_Neurotrophic_factor_mediated_Trk_receptor_signaling_Pathway_(Schwann_cell_development) - NCI 1.2	0.65403	0.608561
NCI_Signaling_events_mediated_by_focal_adhesion_kinase_Main_Pathway - NCI 1.2	0.46761	0.606488
KEGG_Leukocyte_transendothelial_migration_Main_Pathway - KEGG Adjusted 1.5	0.585337	0.605312
reactome_Interferon_gamma_signaling_Main_Pathway - Reactome 1.3	0.505192	0.604799
FN1_Influence_on_Cell_Motility_via_Integrins - Cytoskeleton 1.2	0.56625	0.60424
RANK_Signaling_in_Osteoclasts_Pathway_Resorption - Primary 1.4	0.613433	0.604042
NCI_Signaling_events_mediated_by_the_Hedgehog_family_Pathway_(receptor_mediated_endocytosis) - NCI 1.2	0.599051	0.601514
KEGG_Bacterial_invasion_of_epithelial_cells_Main_Pathway - KEGG Adjusted 1.5	0.512314	0.601409
KEGG_Base_excision_repair_Main_Pathway - KEGG Adjusted 1.5	0.648891	0.601037
reactome_Synthesis_of_bile_acids_and_bile_salts_via_24_hydroxycholesterol_Main_Pathway - Reactome 1.3	0.718101	0.599336
KEGG_Collecting_duct_acid_secretion_Main_Pathway - KEGG Adjusted 1.5	0.601412	0.598824
NCI_Signaling_events_mediated_by_VEGFR1_and_VEGFR2_Main_Pathway - NCI 1.2	0.450748	0.597624
reactome_Polo_like_kinase_mediated_events_Main_Pathway - Reactome 1.3	0.613541	0.595294
KEGG_Tyrosine_metabolism_Main_Pathway - KEGG Adjusted 1.5	0.640079	0.593687
D-imyoi-inositol-5-phosphate_metabolism - Metabolism 1.4	0.638902	0.591136
biocarta_il_6_signaling_Main_Pathway - Biocarta 1.2	0.591617	0.590437
glutathione-mediated_detoxification - Metabolism 1.4	0.594329	0.590157
reactome_Striated_Muscle_Contraction_Main_Pathway - Reactome 1.3	0.407446	0.585871
STAT3_Pathway_Growth_Arrest_and_Differentiation - Primary 1.4	0.539954	0.585242
reactome_Signaling_by_NOTCH3_Main_Pathway - Reactome 1.3	0.570851	0.582877
Ephrin-mediated_Signaling_Events_During_Cell_Adhesion - Cytoskeleton 1.2	0.579778	0.580687
biocarta_regulation_of_ck1_cdk5_by_type_1_glutamate_receptors_Main_Pathway - Biocarta 1.2	0.549808	0.577798
KEGG_Glycosaminoglycan_biosynthesis_keratan_sulfate_Main_Pathway - KEGG Adjusted 1.5	0.515325	0.575038
KEGG_Linoleic_acid_metabolism_Main_Pathway - KEGG Adjusted 1.5	0.616814	0.574246
NCI_Nongenotropic_Androgen_signaling_Pathway_(apoptosis) - NCI 1.2	0.490011	0.573547
biocarta_stathmin_and_breast_cancer_resistance_to_antimicrotubule_agents_Main_Pathway - Biocarta 1.2	0.575732	0.572976
KEGG_RNA_transport_Main_Pathway - KEGG Adjusted 1.5	0.570786	0.572895
Akt_Signaling_Pathway_Glycogen_Synthesis_and_Apoptosis - Primary 1.4	0.572129	0.571462
KEGG_Progesterone_mediated_oocyte_maturation_Main_Pathway - KEGG Adjusted 1.5	0.560236	0.569214
D-imyoi-inositol_134-trisphosphate_biosynthesis - Metabolism 1.4	0.558655	0.568061
biocarta_regulation_of_pgc_1a_Main_Pathway - Biocarta 1.2	0.432919	0.566337
KEGG_Aldosterone_regulated_sodium_reabsorption_Main_Pathway - KEGG Adjusted 1.5	0.540496	0.565347
reactome_Post_chaperonin_tubulin_folding_Main_Pathway - Reactome 1.3	0.567954	0.565102
Akt_Signaling_Pathway_JNK_mediated_apoptosis - Primary 1.4	0.549437	0.564508
heparan_sulfate_biosynthesis_late_stages - Metabolism 1.4	0.651773	0.563425
NCI_Nongenotropic_Androgen_signaling_Pathway_(cell_proliferation) - NCI 1.2	0.436634	0.561724
NCI_Arf6_trafficking_events_Pathway_(calcium_ion_dependent_exocytosis) - NCI 1.2	0.561742	0.561561
biocarta_induction_of_apoptosis_through_dr3_and_dr4_5_death_receptors_Pathway_(Pathway_degradation_of_CASP3_CASP10_CASP10) - Biocarta 1.2	0.610064	0.561526
KEGG_Dilated_cardiomyopathy_Main_Pathway - KEGG Adjusted 1.5	0.43561	0.560594
KEGG_Hypertrophic_cardiomyopathy_HCM__Main_Pathway - KEGG Adjusted 1.5	0.43561	0.560594
NCI_Alpha_synuclein_signaling_Pathway_(Pathway_negative_regulation_of_transcription_via_TOR1A_SNCA_STUB1_FKBP1A) - NCI 1.2	0.56274	0.560245
NCI_Alpha_synuclein_signaling_Pathway_(Pathway_positive_regulation_of_gene_specific_transcription_via_TOR1A_SNCA_FKBP1A_STUB1) - NCI 1.2	0.56274	0.560245
biocarta_regulators_of_bone_mineralization_Main_Pathway - Biocarta 1.2	0.524386	0.560128
NCI_Neurotrophic_factor_mediated_Trk_receptor_signaling_Pathway_(neuron_projection_morphogenesis) - NCI 1.2	0.515673	0.559231
NCI_BCR_signaling_Main_Pathway - NCI 1.2	0.512849	0.557659
NCI_Arf6_trafficking_events_Pathway_(clathrin_coat_assembly) - NCI 1.2	0.54276	0.557379
bile_acid_biosynthesis_neutral_pathway - Metabolism 1.4	0.508021	0.556191
NCI_Alpha_synuclein_signaling_Pathway_(neuron_apoptosis) - NCI 1.2	0.543703	0.55385
KEGG_Folate_biosynthesis_Main_Pathway - KEGG Adjusted 1.5	0.588131	0.552266
Akt_Signaling_Pathway_Increased_GLUT4_translocation - Primary 1.4	0.545171	0.551345
biocarta_t_cell_receptor_signaling_Main_Pathway - Biocarta 1.2	0.436816	0.550134
KEGG_Pantothenate_and_CoA_biosynthesis_Main_Pathway - KEGG Adjusted 1.5	0.537969	0.549086
TGF-Beta_Pathway - Primary 1.4	0.432514	0.546814
KEGG_VEGF_signaling_Main_Pathway - KEGG Adjusted 1.5	0.443284	0.545579
reactome_APC_C_Cdc20_mediated_degradation_of_mitotic_proteins_Main_Pathway - Reactome 1.3	0.548382	0.544193
reactome_Inactivation_of_APC_C_via_direct_inhibition_of_the_APC_C_complex_Main_Pathway - Reactome 1.3	0.548382	0.544193
KEGG_Glutamatergic_synapse_Main_Pathway - KEGG Adjusted 1.5	0.512801	0.543588
1D-imyoi-inositol_hexakisphosphate_biosynthesis_II_mammalian - Metabolism 1.4	0.566542	0.543436
KEGG_Arginine_and_proline_metabolism_Main_Pathway - KEGG Adjusted 1.5	0.508229	0.542295
KEGG_alpha_Linolenic_acid_metabolism_Main_Pathway - KEGG Adjusted 1.5	0.558963	0.541817
biocarta_insulin_signaling_Main_Pathway - Biocarta 1.2	0.375394	0.541526
biocarta_role_of_mef2d_in_t_cell_apoptosis_Main_Pathway - Biocarta 1.2	0.546633	0.541433
reactome_Iron_uptake_and_transport_Main_Pathway - Reactome 1.3	0.477298	0.540757
NCI_Atypical_NF_kappaB_Main_Pathway - NCI 1.2	0.55747	0.538847
KEGG_Phagosome_Main_Pathway - KEGG Adjusted 1.5	0.538656	0.537857
Ras_Pathway_Cell-Cell_Junctions - Primary 1.4	0.447346	0.537169
Chemotaxis_Driven_by_IL-8_and_LTB4 - Cytoskeleton 1.2	0.526005	0.536913
KEGG_Retinol_metabolism_Main_Pathway - KEGG Adjusted 1.5	0.542976	0.534898
reactome_DNA_Damage_Telomere_Stress_Induced_Senescence_Main_Pathway - Reactome 1.3	0.521377	0.5347
biocarta_induction_of_apoptosis_through_dr3_and_dr4_5_death_receptors_Main_Pathway - Biocarta 1.2	0.586355	0.533815
reactome_DSCAM_interactions_Main_Pathway - Reactome 1.3	0.554099	0.533745
NCI_Signaling_events_regulated_by_Ret_tyrosine_kinase_Main_Pathway - NCI 1.2	0.413135	0.533663
reactome_APC_C_Cdc20_mediated_degradation_of_Cyclin_B_Main_Pathway - Reactome 1.3	0.541435	0.5318
NCI_Signaling_events_mediated_by_VEGFR1_and_VEGFR2_Pathway_(regulation_of_vascular_permeability) - NCI 1.2	0.475874	0.531299
CDK5_Signaling_in_Neurons - Cytoskeleton 1.2	0.561553	0.530437
IGF1R_Signaling_Pathway - Primary 1.4	0.50717	0.530274
guanosine_nucleotides_ide_novoi_biosynthesis - Metabolism 1.4	0.605969	0.529598
SMAD_Signaling_Network_Pathway - Primary 1.4	0.505591	0.529156
fatty_acid_beta-oxidation_peroxisome - Metabolism 1.4	0.522151	0.528445
NCI_Signaling_events_mediated_by_VEGFR1_and_VEGFR2_Pathway_(focal_adhesion_assembly) - NCI 1.2	0.478507	0.526045
biocarta_induction_of_apoptosis_through_dr3_and_dr4_5_death_receptors_Pathway_(apoptosis) - Biocarta 1.2	0.571166	0.525941
NCI_Beta1_integrin_cell_surface_interactions_Main_Pathway - NCI 1.2	0.473038	0.525812
reactome_DARPP_32_events_Main_Pathway - Reactome 1.3	0.50428	0.525812
reactome_DCC_mediated_attractive_signaling_Main_Pathway - Reactome 1.3	0.500603	0.524927
biocarta_il_3_signaling_Main_Pathway - Biocarta 1.2	0.439284	0.524554
reactome_APC_Cdc20_mediated_degradation_of_Nek2A_Main_Pathway - Reactome 1.3	0.528251	0.524205
Ras_Pathway_Apoptosis - Primary 1.4	0.466942	0.523832
Chemotaxis_Driven_by_CCR4 - Cytoskeleton 1.2	0.505522	0.521444
Chemotaxis_of_Immune_Cells_During_Allergic_Asthma_and_Eczema_Driven_by_CCR4 - Cytoskeleton 1.2	0.505522	0.521444
reactome_Initial_triggering_of_complement_Main_Pathway - Reactome 1.3	0.46216	0.521083
NCI_Arf1_Main_Pathway - NCI 1.2	0.50385	0.520035
KEGG_Pathogenic_Escherichia_coli_infection_Main_Pathway - KEGG Adjusted 1.5	0.541831	0.519581
NCI_Neurotrophic_factor_mediated_Trk_receptor_signaling_Pathway_(MAPKKK_cascade) - NCI 1.2	0.502888	0.519336
gamma-linolenate_biosynthesis - Metabolism 1.4	0.530314	0.518381
CCR3_Pathway_in_Eosinophils - Cytoskeleton 1.2	0.513495	0.518206
reactome_Signaling_by_FGFR_mutants_Main_Pathway - Reactome 1.3	0.355173	0.517449
reactome_Activated_point_mutants_of_FGFR2_Main_Pathway - Reactome 1.3	0.257303	0.517448
NCI_ErbB1_downstream_signaling_Main_Pathway - NCI 1.2	0.469466	0.516319
NCI_ErbB1_downstream_signaling_Pathway_(ruffle_organization) - NCI 1.2	0.55285	0.516144
TRAF_Pathway_Apoptosis - Primary 1.4	0.501524	0.516075
NCI_Endogenous_TLR_signaling_Pathway_(regulation_of_apoptosis) - NCI 1.2	0.523157	0.515981
NCI_Endogenous_TLR_signaling_Pathway_(regulation_of_cell_proliferation) - NCI 1.2	0.523157	0.515981
NCI_Endogenous_TLR_signaling_Pathway_(regulation_of_interleukin_1_beta_production) - NCI 1.2	0.523157	0.515981
reactome_RMTs_methylate_histone_arginines_Main_Pathway - Reactome 1.3	0.583614	0.515609
KEGG_Fc_epsilon_RI_signaling_Main_Pathway - KEGG Adjusted 1.5	0.575246	0.515154
Chemokine_Ligand_2_Signaling - Cytoskeleton 1.2	0.545034	0.514572
reactome_EPHB_mediated_forward_signaling_Main_Pathway - Reactome 1.3	0.572151	0.513151
NCI_ALK1_signaling_events_Pathway_(endothelial_cell_proliferation) - NCI 1.2	0.472539	0.51272
reactome_Signaling_by_NOTCH4_Main_Pathway - Reactome 1.3	0.492317	0.511485
biocarta_il_4_signaling_Main_Pathway - Biocarta 1.2	0.458463	0.511427
NCI_Endogenous_TLR_signaling_Main_Pathway - NCI 1.2	0.497807	0.511043
reactome_Dermatan_sulfate_biosynthesis_Main_Pathway - Reactome 1.3	0.373682	0.510565
reactome_Signaling_by_constitutively_active_EGFR_Main_Pathway - Reactome 1.3	0.394775	0.510204
biocarta_hiv_1_nef_negative_effector_of_fas_and_tnf_Pathway_(Pathway_protein_ubiquitination_of_CHUK) - Biocarta 1.2	0.554971	0.510064
Akt_Signaling_Pathway_Apoptosis - Primary 1.4	0.514546	0.509994
NCI_Signaling_events_mediated_by_Stem_cell_factor_receptor_c_Kit__Main_Pathway - NCI 1.2	0.446146	0.506733
NCI_Signaling_events_mediated_by_VEGFR1_and_VEGFR2_Pathway_(angiogenesis) - NCI 1.2	0.443524	0.506733
KEGG_Peroxisome_Main_Pathway - KEGG Adjusted 1.5	0.523417	0.505964
NCI_Signaling_events_mediated_by_Hepatocyte_Growth_Factor_Receptor_c_Met__Pathway_(positive_regulation_of_tyrosine_phosphorylation_of_STAT_protein) - NCI 1.2	0.355937	0.503821
NCI_Signaling_events_regulated_by_Ret_tyrosine_kinase_Pathway_(lamellipodium_assembly) - NCI 1.2	0.352521	0.503494
reactome_Hormone_sensitive_lipase_HSL_mediated_triacylglycerol_hydrolysis_Main_Pathway - Reactome 1.3	0.508109	0.502388
NCI_BARD1_signaling_events_Main_Pathway - NCI 1.2	0.511876	0.502365
NCI_Nongenotropic_Androgen_signaling_Main_Pathway - NCI 1.2	0.375645	0.499243
biocarta_how_does_salmonella_hijack_a_cell_Pathway_(lamellipodium_assembly) - Biocarta 1.2	0.487628	0.499115
Akt_Signaling_Pathway_Cell_Survival - Primary 1.4	0.498462	0.498987
HIF1Alpha_Pathway_NOS_Pathway - Primary 1.4	0.44163	0.498975
HIF1Alpha_Pathway_VEGF_Pathway - Primary 1.4	0.44163	0.498975
heparan_sulfate_biosynthesis - Metabolism 1.4	0.530965	0.498334
KEGG_Nicotinate_and_nicotinamide_metabolism_Main_Pathway - KEGG Adjusted 1.5	0.515004	0.495166
Cell_Adhesion_Regulated_by_CDHs - Cytoskeleton 1.2	0.488141	0.494502
IL-2_Pathway_Gene_Expression_via_FYN_LYN_RPS6KB1_PTK2B - Primary 1.4	0.493436	0.493477
reactome_Synthesis_of_bile_acids_and_bile_salts_via_7alpha_hydroxycholesterol_Main_Pathway - Reactome 1.3	0.638127	0.491054
NCI_BARD1_signaling_events_Pathway_(DNA_repair) - NCI 1.2	0.51773	0.490914
NCI_Ephrin_B_reverse_signaling_Main_Pathway - NCI 1.2	0.458318	0.490437
NCI_BCR_signaling_Pathway_(cytokine_secretion) - NCI 1.2	0.516202	0.490239
reactome_Synthesis_of_PIPs_at_the_early_endosome_membrane_Main_Pathway - Reactome 1.3	0.492167	0.489645
reactome_Interleukin_7_signaling_Main_Pathway - Reactome 1.3	0.284286	0.488305
biocarta_rho_selective_guanine_exchange_factor_akap13_mediates_stress_fiber_formation_Main_Pathway - Biocarta 1.2	0.454963	0.487804
NCI_ErbB1_downstream_signaling_Pathway_(cell_proliferation) - NCI 1.2	0.442277	0.487746
biocarta_map_kinase_inactivation_of_smrt_corepressor_Main_Pathway - Biocarta 1.2	0.455494	0.487711
NCI_Endothelins_Main_Pathway - NCI 1.2	0.432188	0.487327
IL-2_Pathway_Apoptosis_Inhibition - Primary 1.4	0.510232	0.48728
reactome_p75NTR_recruits_signalling_complexes_Main_Pathway - Reactome 1.3	0.468016	0.487268
KEGG_Synthesis_and_degradation_of_ketone_bodies_Main_Pathway - KEGG Adjusted 1.5	0.479407	0.486838
NCI_Alpha6_beta4_integrin_ligand_interactions_Main_Pathway - NCI 1.2	0.549376	0.486395
NCI_E_cadherin_signaling_in_keratinocytes_Pathway_(adherens_junction_organization) - NCI 1.2	0.515046	0.484659
reactome_Acetylcholine_regulates_insulin_secretion_Main_Pathway - Reactome 1.3	0.496218	0.48226
IL-10_Pathway - Primary 1.4	0.44976	0.482027
Ras_Pathway_Gene_Expression_Cell_Proliferation_Cell_Survival_Differentiation_Development_Cell_Cycle_Control_Cell_Motility_Tumorigenesis_via_ELK4_ATF2_MEF2D_STAT2_CREB3_CCNA1_MYC_ELK1_JUN_CDK4 - Primary 1.4	0.512956	0.481316
adenosine_deoxyribonucleotides_ide_novoi_biosynthesis - Metabolism 1.4	0.528039	0.480023
Chemotaxis_Driven_by_CCL2 - Cytoskeleton 1.2	0.487962	0.479022
Akt_Signaling_Pathway_ERK_mediated_apoptosis - Primary 1.4	0.49399	0.476937
KEGG_Pentose_phosphate_Main_Pathway - KEGG Adjusted 1.5	0.498713	0.475492
KEGG_Ras_signaling_Main_Pathway - KEGG Adjusted 1.5	0.445365	0.474898
NCI_Beta3_integrin_cell_surface_interactions_Main_Pathway - NCI 1.2	0.438664	0.474572
reactome_Platelet_sensitization_by_LDL_Main_Pathway - Reactome 1.3	0.451837	0.474316
HGF_Pathway_Anoikis - Primary 1.4	0.459379	0.473745
reactome_RIP_mediated_NFkB_activation_via_ZBP1_Main_Pathway - Reactome 1.3	0.45054	0.472848
Akt_Signaling_Pathway - Primary 1.4	0.47607	0.471765
Calcium2+_Signaling - Cytoskeleton 1.2	0.403511	0.471706
KEGG_p53_signaling_Main_Pathway - KEGG Adjusted 1.5	0.455823	0.470635
reactome_Presynaptic_function_of_Kainate_receptors_Main_Pathway - Reactome 1.3	0.365861	0.467769
NCI_Netrin_mediated_signaling_events_Main_Pathway - NCI 1.2	0.441355	0.467618
CXC_Chemokine_Receptor_Pathway - Cytoskeleton 1.2	0.411744	0.467548
NCI_Ephrin_B_reverse_signaling_Pathway_(cell_adhesion) - NCI 1.2	0.464608	0.466966
reactome_KSRP_destabilizes_mRNA_Main_Pathway - Reactome 1.3	0.499666	0.466383
biocarta_internal_ribosome_entry_Main_Pathway - Biocarta 1.2	0.457323	0.46601
biocarta_internal_ribosome_entry_Pathway_(translational_initiation) - Biocarta 1.2	0.457323	0.46601
reactome_ABC_family_proteins_mediated_transport_Main_Pathway - Reactome 1.3	0.470243	0.465941
Ephrin-B_Pathway - Cytoskeleton 1.2	0.47399	0.465323
Ras_Pathway - Primary 1.4	0.448904	0.464962
reactome_Dissolution_of_Fibrin_Clot_Main_Pathway - Reactome 1.3	0.428787	0.464927
reactome_Degradation_of_the_extracellular_matrix_Main_Pathway - Reactome 1.3	0.525942	0.463331
Akt_Signaling_Pathway_Enhancement_of_Breast_Epithelial - Primary 1.4	0.442413	0.462842
KEGG_Salivary_secretion_Main_Pathway - KEGG Adjusted 1.5	0.418706	0.462644
reactome_Synthesis_of_Leukotrienes_LT_and_Eoxins_EX__Main_Pathway - Reactome 1.3	0.509737	0.462038
STAT3_Pathway - Primary 1.4	0.464338	0.461712
KEGG_Sphingolipid_metabolism_Main_Pathway - KEGG Adjusted 1.5	0.446563	0.460396
Akt_Signaling_Pathway_Blood_cell_differentiation - Primary 1.4	0.464825	0.460093
Akt_Signaling_Pathway_Elevation_of_Glucose_Import - Primary 1.4	0.464825	0.460093
Akt_Signaling_Pathway_NF-kB_dependent_transciption - Primary 1.4	0.464825	0.460093
reactome_Inhibition_of_replication_initiation_of_damaged_DNA_by_RB1_E2F1_Main_Pathway - Reactome 1.3	0.490899	0.459744
KEGG_Glycosphingolipid_biosynthesis_ganglio_series_Main_Pathway - KEGG Adjusted 1.5	0.4498	0.459592
CMP_phosphorylation - Metabolism 1.4	0.473201	0.458369
reactome_Synthesis_of_very_long_chain_fatty_acyl_CoAs_Main_Pathway - Reactome 1.3	0.514228	0.457286
NCI_Arf6_signaling_events_Main_Pathway - NCI 1.2	0.330925	0.456005
Akt_Signaling_Pathway_Cell_Cycle_Progression - Primary 1.4	0.44697	0.454886
D-imyoi-inositol_145-trisphosphate_biosynthesis - Metabolism 1.4	0.477593	0.454584
UTP_and_CTP_ide_novoi_biosynthesis - Metabolism 1.4	0.52196	0.454479
reactome_ADP_signalling_through_P2Y_purinoceptor_1_Main_Pathway - Reactome 1.3	0.37587	0.453791
biocarta_repression_of_pain_sensation_by_the_transcriptional_regulator_dream_Main_Pathway - Biocarta 1.2	0.367058	0.453256
NCI_Arf6_trafficking_events_Pathway_(cell_adhesion_mediated_by_integrin) - NCI 1.2	0.455127	0.452114
reactome_Activation_of_Matrix_Metalloproteinases_Main_Pathway - Reactome 1.3	0.540937	0.451928
reactome_ECM_proteoglycans_Main_Pathway - Reactome 1.3	0.380982	0.451357
KEGG_Taste_transduction_Main_Pathway - KEGG Adjusted 1.5	0.448047	0.451206
KEGG_Renin_angiotensin_system_Main_Pathway - KEGG Adjusted 1.5	0.427558	0.450076
NCI_E_cadherin_signaling_in_keratinocytes_Main_Pathway - NCI 1.2	0.493149	0.449901
NCI_Signaling_mediated_by_p38_gamma_and_p38_delta_Main_Pathway - NCI 1.2	0.416438	0.449062
NCI_Neurotrophic_factor_mediated_Trk_receptor_signaling_Main_Pathway - NCI 1.2	0.305017	0.449039
reactome_Signaling_by_BMP_Main_Pathway - Reactome 1.3	0.400619	0.44834
reactome_temp_Nuclear_Receptor_transcription_pathway - Reactome 1.3	0.386474	0.447909
KEGG_Glyoxylate_and_dicarboxylate_metabolism_Main_Pathway - KEGG Adjusted 1.5	0.400768	0.447606
Cytoskeleton_Reorganization - Cytoskeleton 1.2	0.3899	0.447327
NCI_LKB1_signaling_events_Pathway_(Pathway_positive_regulation_of_CREB_transcription_factor_activity_via_CRTC2) - NCI 1.2	0.450902	0.446686
HGF_Pathway_Regulation_of_Cytoskeleton_Cell_Polarity_and_Cell_Motility - Primary 1.4	0.342087	0.445044
NCI_Signaling_events_mediated_by_HDAC_Class_I_Main_Pathway - NCI 1.2	0.428018	0.444356
NCI_ATM_Main_Pathway - NCI 1.2	0.440474	0.4441
reactome_Interferon_alpha_beta_signaling_Main_Pathway - Reactome 1.3	0.502267	0.443949
NCI_Notch_signaling_Pathway_(Bergmann_glial_cell_differentiation) - NCI 1.2	0.368732	0.443797
reactome_Acetylcholine_Neurotransmitter_Release_Cycle_Main_Pathway - Reactome 1.3	0.444644	0.442737
reactome_Dopamine_Neurotransmitter_Release_Cycle_Main_Pathway - Reactome 1.3	0.444644	0.442737
HGF_Pathway_Gene_Expression_via_JUN_STAT3_FOS_ELK1_ETS2 - Primary 1.4	0.242235	0.441887
NCI_Signaling_events_mediated_by_focal_adhesion_kinase_Pathway_(cell_migration) - NCI 1.2	0.350846	0.438963
reactome_Downstream_signal_transduction_Main_Pathway - Reactome 1.3	0.453005	0.43788
NCI_LPA_receptor_mediated_events_Pathway_(cAMP_biosynthetic_process) - NCI 1.2	0.355969	0.437647
reactome_Activation_of_PPARGC1A_PGC_1alpha_by_phosphorylation_Main_Pathway - Reactome 1.3	0.325856	0.436983
reactome_Prolactin_receptor_signaling_Main_Pathway - Reactome 1.3	0.36367	0.436517
Extracellular_Matrix_Remodeling_during_Adhesion - Cytoskeleton 1.2	0.462976	0.436133
Akt_Signaling_Pathway_AR_mediated_apoptosis - Primary 1.4	0.410722	0.435946
TRAF_Pathway_Direct_Antimicrobial_Response_and_Cell-Mediated_Immunity_and_Apoptosis_of_Host_Cell - Primary 1.4	0.461693	0.435946
TNF_Signaling_Pathway_Gene_Expression_and_Cell_Survival_via_FOS_NFKB2_JUN_ELK1_ATF6 - Primary 1.4	0.430336	0.435679
reactome_Hyaluronan_uptake_and_degradation_Main_Pathway - Reactome 1.3	0.465817	0.435492
KEGG_Glycerophospholipid_metabolism_Main_Pathway - KEGG Adjusted 1.5	0.439356	0.432871
NCI_E_cadherin_signaling_in_keratinocytes_Pathway_(apoptosis) - NCI 1.2	0.420341	0.432755
NCI_Notch_signaling_Pathway_(oligodendrocyte_development) - NCI 1.2	0.363422	0.431998
NCI_ALK1_signaling_events_Main_Pathway - NCI 1.2	0.388393	0.431939
biocarta_mcalpain_and_friends_in_cell_motility_Main_Pathway - Biocarta 1.2	0.330781	0.431858
TNF_Signaling_Pathway_Apoptosis - Primary 1.4	0.465514	0.430192
reactome_Activation_of_Rac_Main_Pathway - Reactome 1.3	0.36029	0.428433
reactome_Signaling_by_FGFR1_fusion_mutants_Main_Pathway - Reactome 1.3	0.396665	0.428352
Akt_Signaling_Pathway_Aggregation_and_Neurodegeneration - Primary 1.4	0.413699	0.428107
Ubiquitin-Proteasome_Dependent_Proteolysis_Pathway - Primary 1.4	0.425614	0.427979
KEGG_Gap_junction_Main_Pathway - KEGG Adjusted 1.5	0.292815	0.425708
HGF_Pathway_Cell_Adhesion_and_Cell_Migration - Primary 1.4	0.431304	0.425533
KEGG_Protein_processing_in_endoplasmic_reticulum_Main_Pathway - KEGG Adjusted 1.5	0.34846	0.425475
Akt_Signaling_Pathway_Acetylation_of_proteins - Primary 1.4	0.442917	0.424252
AHR_Pathway_C-myc_expression_via_RELA - Primary 1.4	0.41213	0.424205
NCI_EPHA2_forward_signaling_Main_Pathway - NCI 1.2	0.435674	0.423425
NCI_Beta2_integrin_cell_surface_interactions_Main_Pathway - NCI 1.2	0.40486	0.422132
NCI_Signaling_events_mediated_by_TCPTP_Pathway_(G1_S_transition_of_mitotic_cell_cycle) - NCI 1.2	0.434651	0.421503
NCI_Signaling_events_mediated_by_TCPTP_Pathway_(MAPKKK_cascade) - NCI 1.2	0.434651	0.421503
KEGG_Transcriptional_misregulation_in_cancer_Main_Pathway - KEGG Adjusted 1.5	0.395304	0.42113
reactome_Dual_incision_reaction_in_GG_NER_Main_Pathway - Reactome 1.3	0.448052	0.419476
KEGG_Spliceosome_Main_Pathway - KEGG Adjusted 1.5	0.411159	0.418334
reactome_ERK_MAPK_targets_Main_Pathway - Reactome 1.3	0.452695	0.418055
NCI_Signaling_events_mediated_by_TCPTP_Pathway_(regulation_of_gluconeogenesis) - NCI 1.2	0.420582	0.417402
RANK_Signaling_in_Osteoclasts_Pathway_Inhibition_of_Death - Primary 1.4	0.388424	0.416308
NCI_Ephrin_B_reverse_signaling_Pathway_(angiogenesis) - NCI 1.2	0.428966	0.414875
NCI_Ephrin_B_reverse_signaling_Pathway_(endothelial_cell_migration) - NCI 1.2	0.428966	0.414875
reactome_Activated_NOTCH1_Transmits_Signal_to_the_Nucleus_Main_Pathway - Reactome 1.3	0.369173	0.413873
CDC42_Pathway - Cytoskeleton 1.2	0.440371	0.412417
NCI_Notch_signaling_Main_Pathway - NCI 1.2	0.367587	0.410833
HGF_Pathway_Cell_Cycle_Progression - Primary 1.4	0.382976	0.409563
KEGG_Colorectal_cancer_Main_Pathway - KEGG Adjusted 1.5	0.380594	0.408981
NCI_Signaling_events_mediated_by_the_Hedgehog_family_Main_Pathway - NCI 1.2	0.433803	0.407688
CD16_Pathway_in_Natural_Killer_cells - Cytoskeleton 1.2	0.433231	0.40707
cholesterol_biosynthesis_I - Metabolism 1.4	0.478974	0.406535
cholesterol_biosynthesis_II_via_2425-dihydrolanosterol - Metabolism 1.4	0.478974	0.406535
cholesterol_biosynthesis_III_via_desmosterol - Metabolism 1.4	0.478974	0.406535
KEGG_Steroid_biosynthesis_Main_Pathway - KEGG Adjusted 1.5	0.452085	0.405894
NCI_AP_1_transcription_factor_network_Main_Pathway - NCI 1.2	0.36739	0.405743
KEGG_Selenocompound_metabolism_Main_Pathway - KEGG Adjusted 1.5	0.406954	0.405312
biocarta_integrin_signaling_Main_Pathway - Biocarta 1.2	0.306597	0.402854
reactome_Synthesis_of_PIPs_at_the_plasma_membrane_Main_Pathway - Reactome 1.3	0.370777	0.4024
TNF_Signaling_Pathway - Primary 1.4	0.443421	0.401398
IGF1R_Signaling_Pathway_Apoptosis - Primary 1.4	0.31051	0.399592
NCI_Signaling_events_mediated_by_HDAC_Class_I_Pathway_(histone_deacetylation) - NCI 1.2	0.366996	0.399255
NCI_Integrins_in_angiogenesis_Main_Pathway - NCI 1.2	0.415026	0.398591
NCI_LKB1_signaling_events_Pathway_(establishment_of_cell_polarity) - NCI 1.2	0.267374	0.398404
HIF1Alpha_Pathway_Gene_Expression_via_JUN_CREB3 - Primary 1.4	0.348184	0.397903
Akt_Signaling_Pathway_Induction_of_Chromatin_Condensation - Primary 1.4	0.410882	0.397798
NCI_LPA_receptor_mediated_events_Main_Pathway - NCI 1.2	0.329996	0.397694
HMGB1_signaling_through_RAGE - Cytoskeleton 1.2	0.360786	0.397612
reactome_Downregulation_of_SMAD2_3_SMAD4_transcriptional_activity_Main_Pathway - Reactome 1.3	0.406106	0.396063
reactome_Integrin_cell_surface_interactions_Main_Pathway - Reactome 1.3	0.363088	0.395411
AHR_Pathway_Cath_D_expression_via_SP1 - Primary 1.4	0.381498	0.393885
Akt_Signaling_Pathway_Blocks_Apoptosis - Primary 1.4	0.385206	0.393069
biocarta_role_of_pi3k_subunit_p85_in_regulation_of_actin_organization_and_cell_migration_Main_Pathway - Biocarta 1.2	0.403518	0.393046
KEGG_Pertussis_Main_Pathway - KEGG Adjusted 1.5	0.260179	0.392999
KEGG_Alcoholism_Main_Pathway - KEGG Adjusted 1.5	0.390071	0.392137
KEGG_Bladder_cancer_Main_Pathway - KEGG Adjusted 1.5	0.422818	0.391951
reactome_Activation_of_DNA_fragmentation_factor_Main_Pathway - Reactome 1.3	0.416381	0.391532
IL-10_Pathway_IL-10_Responsive_Genes_Transcription_of_BCLXL_Cyclin-D1_D2_D3_Pim1_c-Myc_and_P19(INK4D)_via_STAT3 - Primary 1.4	0.383443	0.39138
IL-10_Pathway_Inflammatory_Cytokine_Genes_Expression_via_STAT3 - Primary 1.4	0.383443	0.39138
reactome_temp_Immunoregulatory_interactions_between_a_Lymphoid_and_a_non-Lymphoid_cell - Reactome 1.3	0.380909	0.387408
biocarta_mapkinase_signaling_Main_Pathway - Biocarta 1.2	0.342874	0.386907
NCI_Signaling_events_mediated_by_VEGFR1_and_VEGFR2_Pathway_(cell_proliferation) - NCI 1.2	0.238119	0.386838
AHR_Pathway_PS2_Gene_expression_via_ESR1 - Primary 1.4	0.365837	0.385859
FAK_Pathway - Cytoskeleton 1.2	0.341253	0.385277
NCI_Nephrin_Neph1_signaling_in_the_kidney_podocyte_Main_Pathway - NCI 1.2	0.35727	0.384473
NCI_Signaling_events_mediated_by_focal_adhesion_kinase_Pathway_(negative_regulation_of_cell_adhesion_involved_in_substrate_bound_cell_migration) - NCI 1.2	0.345726	0.383157
IGF1R_Signaling_Pathway_Cell_Survival - Primary 1.4	0.38182	0.379802
biocarta_il_7_signal_transduction_Main_Pathway - Biocarta 1.2	0.362271	0.378311
Akt_Pathway_Regulation_by_GH - Cytoskeleton 1.2	0.311972	0.377833
biocarta_lck_and_fyn_tyrosine_kinases_in_initiation_of_tcr_activation_Main_Pathway - Biocarta 1.2	0.295483	0.37682
KEGG_Propanoate_metabolism_Main_Pathway - KEGG Adjusted 1.5	0.415033	0.375119
TGF-Beta_Pathway_Post_Transciptional_G1_Arrest - Primary 1.4	0.339823	0.374362
Chemotaxis_Driven_by_C5a - Cytoskeleton 1.2	0.398538	0.373687
ATM_Pathway_Cell_Survival - Primary 1.4	0.336358	0.373151
reactome_Prefoldin_mediated_transfer_of_substrate_to_CCT_TriC_Main_Pathway - Reactome 1.3	0.413961	0.372673
reactome_APC_C_Cdc20_mediated_degradation_of_Securin_Main_Pathway - Reactome 1.3	0.37418	0.372627
reactome_APC_C_Cdh1_mediated_degradation_of_Cdc20_and_other_APC_C_Cdh1_targeted_proteins_in_late_mitosis_early_G1_Main_Pathway - Reactome 1.3	0.37418	0.372627
Ras_Pathway_Increased_T-cell_Adhesion - Primary 1.4	0.387772	0.372499
chondroitin_sulfate_biosynthesis_late_stages - Metabolism 1.4	0.404118	0.371939
reactome_pre_mRNA_splicing_Main_Pathway - Reactome 1.3	0.353162	0.371823
biocarta_hypoxia_inducible_factor_in_the_cardivascular_system_Main_Pathway - Biocarta 1.2	0.350458	0.371555
reactome_Deposition_of_new_CENPA_containing_nucleosomes_at_the_centromere_Main_Pathway - Reactome 1.3	0.413871	0.37145
KEGG_Lysosome_Main_Pathway - KEGG Adjusted 1.5	0.364472	0.369959
HGF_Pathway_Cell_Scattering - Primary 1.4	0.403422	0.369645
HGF_Pathway_Cell_Survival - Primary 1.4	0.403422	0.369645
NCI_Internalization_of_ErbB1_Main_Pathway - NCI 1.2	0.309121	0.369412
TGF-Beta_Pathway_Epithelial_Mesenchymal_Transdifferentiation - Primary 1.4	0.383491	0.367699
KEGG_Complement_and_coagulation_cascades_Main_Pathway - KEGG Adjusted 1.5	0.286276	0.366535
NCI_Signaling_events_mediated_by_TCPTP_Pathway_(macrophage_differentiation) - NCI 1.2	0.36441	0.365731
NCI_Nectin_adhesion_Main_Pathway - NCI 1.2	0.374186	0.365684
reactome_IRF3_mediated_induction_of_type_I_IFN_Main_Pathway - Reactome 1.3	0.42825	0.364683
NCI_Signaling_events_mediated_by_TCPTP_Pathway_(positive_regulation_of_S_phase_of_mitotic_cell_cycle) - NCI 1.2	0.408866	0.361654
NCI_E_cadherin_signaling_in_keratinocytes_Pathway_(keratinocyte_differentiation) - NCI 1.2	0.384754	0.36014
KEGG_Gastric_acid_secretion_Main_Pathway - KEGG Adjusted 1.5	0.259971	0.359837
reactome_Processing_of_Intronless_Pre_mRNAs_Main_Pathway - Reactome 1.3	0.372158	0.357635
AHR_Pathway - Primary 1.4	0.37134	0.357496
NCI_Signaling_events_mediated_by_PRL_Main_Pathway - NCI 1.2	0.388881	0.356471
biocarta_multi_step_regulation_of_transcription_by_pitx2_Main_Pathway - Biocarta 1.2	0.41292	0.355084
KEGG_TNF_signaling_Main_Pathway - KEGG Adjusted 1.5	0.300502	0.354292
biocarta_inactivation_of_gsk3_by_akt_causes_accumulation_of_b_catenin_in_alveolar_macrophages_Main_Pathway - Biocarta 1.2	0.457128	0.354164
reactome_temp_Post-translational_modification_synthesis_of_GPI-anchored_proteins - Reactome 1.3	0.336921	0.35399
NCI_Signaling_mediated_by_p38_alpha_and_p38_beta_Main_Pathway - NCI 1.2	0.31983	0.353966
Akt_Signaling_Pathway_NF-kB_pathway - Primary 1.4	0.385764	0.353081
KEGG_PPAR_signaling_Main_Pathway - KEGG Adjusted 1.5	0.20368	0.352785
KEGG_Melanoma_Main_Pathway - KEGG Adjusted 1.5	0.245179	0.351287
CDK5_Pathway_in_Central_Nervous_System - Cytoskeleton 1.2	0.238002	0.350367
3-phosphoinositide_biosynthesis - Metabolism 1.4	0.32198	0.349295
FGFR_Signaling - Cytoskeleton 1.2	0.283845	0.34926
NCI_E_cadherin_signaling_in_the_nascent_adherens_junction_Pathway_(regulation_of_actin_nucleation) - NCI 1.2	0.377378	0.348596
KEGG_Hedgehog_signaling_Main_Pathway - KEGG Adjusted 1.5	0.313272	0.347711
Ras_Pathway_Golgi_Trafficking_and_Vesicle_Formation - Primary 1.4	0.401689	0.345626
reactome_Detoxification_of_Reactive_Oxygen_Species_Main_Pathway - Reactome 1.3	0.472892	0.344613
Akt_Signaling_Pathway_Genetic_Stability - Primary 1.4	0.382247	0.34417
reactome_RNA_Polymerase_III_Transcription_Initiation_From_Type_1_Promoter_Main_Pathway - Reactome 1.3	0.410682	0.343564
biocarta_role_of_erk5_in_neuronal_survival_Pathway_(cell_survival) - Biocarta 1.2	0.252111	0.342318
KEGG_Morphine_addiction_Main_Pathway - KEGG Adjusted 1.5	0.337672	0.34014
KEGG_Thyroid_hormone_signaling_Main_Pathway - KEGG Adjusted 1.5	0.330957	0.339895
Akt_Signaling_Pathway_NFAT_degradation - Primary 1.4	0.370576	0.339499
biocarta_inhibition_of_cellular_proliferation_by_gleevec_Main_Pathway - Biocarta 1.2	0.32598	0.337076
IGF1R_Signaling_Pathway_Cell_Migration - Primary 1.4	0.364287	0.336715
KEGG_Regulation_of_lipolysis_in_adipocytes_Main_Pathway - KEGG Adjusted 1.5	0.330087	0.335213
reactome_Synthesis_of_PIPs_at_the_Golgi_membrane_Main_Pathway - Reactome 1.3	0.373405	0.331963
ATM_Pathway - Primary 1.4	0.336407	0.331893
reactome_EPH_ephrin_mediated_repulsion_of_cells_Main_Pathway - Reactome 1.3	0.375695	0.328701
KEGG_Ubiquitin_mediated_proteolysis_Main_Pathway - KEGG Adjusted 1.5	0.34687	0.327921
NCI_E_cadherin_signaling_in_the_nascent_adherens_junction_Main_Pathway - NCI 1.2	0.336755	0.326966
KEGG_Type_I_diabetes_mellitus_Main_Pathway - KEGG Adjusted 1.5	0.366044	0.326803
reactome_Processing_of_Capped_Intron_Containing_Pre_mRNA_Main_Pathway - Reactome 1.3	0.288019	0.326581
KEGG_Insulin_secretion_Main_Pathway - KEGG Adjusted 1.5	0.356867	0.326488
reactome_RNA_Polymerase_III_Transcription_Termination_Main_Pathway - Reactome 1.3	0.319528	0.32608
biocarta_keratinocyte_differentiation_Pathway_(apoptosis) - Biocarta 1.2	0.385572	0.325358
TRAF_Pathway_Cell_Survival - Primary 1.4	0.370098	0.323809
NCI_Integrins_in_angiogenesis_Pathway_(angiogenesis) - NCI 1.2	0.267684	0.322644
biocarta_the_co_stimulatory_signal_during_t_cell_activation_Pathway_(T_cell_activation) - Biocarta 1.2	0.362101	0.322504
KEGG_GABAergic_synapse_Main_Pathway - KEGG Adjusted 1.5	0.30582	0.322469
IGF1R_Signaling_Pathway_Protein_Synthesis - Primary 1.4	0.34663	0.322271
KEGG_Fanconi_anemia_Main_Pathway - KEGG Adjusted 1.5	0.347004	0.322248
reactome_RNA_Polymerase_III_Abortive_And_Retractive_Initiation_Main_Pathway - Reactome 1.3	0.360983	0.322015
reactome_Downstream_TCR_signaling_Main_Pathway - Reactome 1.3	0.335649	0.321712
KEGG_Tight_junction_Main_Pathway - KEGG Adjusted 1.5	0.29674	0.32113
reactome_Degradation_of_beta_catenin_by_the_destruction_complex_Main_Pathway - Reactome 1.3	0.320154	0.32078
TGF-Beta_Pathway_Transciption_Arrested_Growth_Apoptosis - Primary 1.4	0.281841	0.320082
TGF-Beta_Pathway_Transciption_Cell_Growth_and_Mobility_and_Angiogenesis - Primary 1.4	0.281841	0.320082
KEGG_Neurotrophin_signaling_Main_Pathway - KEGG Adjusted 1.5	0.224318	0.318451
NCI_Sphingosine_1_phosphate_S1P_Main_Pathway - NCI 1.2	0.261694	0.318125
NCI_Signaling_events_mediated_by_TCPTP_Main_Pathway - NCI 1.2	0.389576	0.316377
biocarta_skeletal_muscle_hypertrophy_is_regulated_via_akt_mtor_Main_Pathway - Biocarta 1.2	0.358719	0.315131
NCI_EPHA_forward_signaling_Pathway_(cell_cell_adhesion) - NCI 1.2	0.274983	0.314292
NCI_EPHA_forward_signaling_Pathway_(regulation_of_stress_fiber_assembly) - NCI 1.2	0.274983	0.314292
reactome_EPHA_mediated_growth_cone_collapse_Main_Pathway - Reactome 1.3	0.31735	0.31258
reactome_Pre_NOTCH_Processing_in_Golgi_Main_Pathway - Reactome 1.3	0.317873	0.312335
NCI_EPHA_forward_signaling_Pathway_(proteasomal_ubiquitin_dependent_protein_catabolic_process) - NCI 1.2	0.293184	0.312184
biocarta_mechanisms_of_transcriptional_repression_by_dna_methylation_Main_Pathway - Biocarta 1.2	0.271664	0.309959
biocarta_mechanisms_of_transcriptional_repression_by_dna_methylation_Pathway_(histone_deacetylation) - Biocarta 1.2	0.271664	0.309959
Gamma-Aminobutyric_Acid_A_Receptor_Pathway - Cytoskeleton 1.2	0.314937	0.309715
reactome_Synthesis_of_PA_Main_Pathway - Reactome 1.3	0.370085	0.306639
biocarta_oxidative_stress_induced_gene_expression_via_nrf2_Main_Pathway - Biocarta 1.2	0.264477	0.305871
KEGG_Basal_transcription_factors_Main_Pathway - KEGG Adjusted 1.5	0.331734	0.305277
reactome_Activation_of_NF_kappaB_in_B_cells_Main_Pathway - Reactome 1.3	0.320379	0.303925
reactome_Sphingolipid_de_novo_biosynthesis_Main_Pathway - Reactome 1.3	0.268482	0.302924
reactome_RNA_Polymerase_III_Transcription_Initiation_From_Type_3_Promoter_Main_Pathway - Reactome 1.3	0.377358	0.301607
biocarta_lissencephaly_gene_lis1_in_neuronal_migration_and_development_Pathway_(retrograde_axon_cargo_transport) - Biocarta 1.2	0.270203	0.300676
NCI_EPHA_forward_signaling_Pathway_(axon_guidance) - NCI 1.2	0.258953	0.300676
IGF1R_Signaling_Pathway_Cell_Proliferation_Diferentiation_and_Apoptosis - Primary 1.4	0.250915	0.300221
NCI_N_cadherin_signaling_events_Pathway_(myoblast_differentiation) - NCI 1.2	0.334993	0.299814
biocarta_mets_affect_on_macrophage_differentiation_Main_Pathway - Biocarta 1.2	0.25529	0.299231
reactome_ERKs_are_inactivated_Main_Pathway - Reactome 1.3	0.281364	0.29788
NCI_Endothelins_Pathway_(cAMP_biosynthetic_process) - NCI 1.2	0.311509	0.297577
reactome_A_tetrasaccharide_linker_sequence_is_required_for_GAG_synthesis_Main_Pathway - Reactome 1.3	0.279394	0.29661
reactome_E2F_mediated_regulation_of_DNA_replication_Main_Pathway - Reactome 1.3	0.222398	0.294143
reactome_RNA_Polymerase_III_Transcription_Initiation_From_Type_2_Promoter_Main_Pathway - Reactome 1.3	0.373163	0.29258
ICOS_signaling_in_T-helper_cells - Cytoskeleton 1.2	0.309354	0.292301
reactome_Signaling_by_NODAL_Main_Pathway - Reactome 1.3	0.265303	0.292289
reactome_Prostacyclin_signalling_through_prostacyclin_receptor_Main_Pathway - Reactome 1.3	0.220997	0.290122
reactome_Synthesis_of_glycosylphosphatidylinositol_GPI__Main_Pathway - Reactome 1.3	0.357235	0.289866
reactome_ADP_signalling_through_P2Y_purinoceptor_12_Main_Pathway - Reactome 1.3	0.281023	0.289225
biocarta_influence_of_ras_and_rho_proteins_on_g1_to_s_transition_Main_Pathway - Biocarta 1.2	0.234746	0.289027
reactome_Activation_of_the_AP_1_family_of_transcription_factors_Main_Pathway - Reactome 1.3	0.31378	0.288748
KEGG_Endometrial_cancer_Main_Pathway - KEGG Adjusted 1.5	0.233083	0.288014
biocarta_melanocyte_development_and_pigmentation_Main_Pathway - Biocarta 1.2	0.239649	0.282434
KEGG_RNA_polymerase_Main_Pathway - KEGG Adjusted 1.5	0.361868	0.279918
chondroitin_sulfate_biosynthesis - Metabolism 1.4	0.2205	0.278998
reactome_Integrin_alphaIIb_beta3_signaling_Main_Pathway - Reactome 1.3	0.20916	0.276855
reactome_RNA_Polymerase_III_Chain_Elongation_Main_Pathway - Reactome 1.3	0.364943	0.276389
KEGG_Axon_guidance_Main_Pathway - KEGG Adjusted 1.5	0.294917	0.273943
NCI_EPHA_forward_signaling_Main_Pathway - NCI 1.2	0.265126	0.269703
Angiotensin-PTK2B_Pathway - Cytoskeleton 1.2	0.23883	0.266593
NCI_ALK2_signaling_events_Main_Pathway - NCI 1.2	0.199366	0.266407
reactome_RNA_Polymerase_II_Pre_transcription_Events_Main_Pathway - Reactome 1.3	0.313365	0.26615
TRAF_Pathway_Gene_Expression_via_FOS_JUN - Primary 1.4	0.311174	0.266069
dermatan_sulfate_biosynthesis - Metabolism 1.4	0.266013	0.265929
reactome_EGFR_downregulation_Main_Pathway - Reactome 1.3	0.262709	0.264007
HIF1Alpha_Pathway - Primary 1.4	0.302178	0.263192
KEGG_Chronic_myeloid_leukemia_Main_Pathway - KEGG Adjusted 1.5	0.188091	0.262528
NCI_Notch_mediated_HES_HEY_network_Main_Pathway - NCI 1.2	0.282114	0.260897
reactome_RNA_Polymerase_II_Transcription_Elongation_Main_Pathway - Reactome 1.3	0.308429	0.257507
NCI_CD40_CD40L_signaling_Main_Pathway - NCI 1.2	0.335696	0.253524
KEGG_Acute_myeloid_leukemia_Main_Pathway - KEGG Adjusted 1.5	0.181918	0.251485
KEGG_Hepatitis_C_Main_Pathway - KEGG Adjusted 1.5	0.191449	0.251474
TCA_cycle - Metabolism 1.4	0.231053	0.249156
NCI_ErbB2_ErbB3_signaling_events_Main_Pathway - NCI 1.2	0.20013	0.248224
KEGG_Adipocytokine_signaling_Main_Pathway - KEGG Adjusted 1.5	0.230198	0.241969
KEGG_Pancreatic_cancer_Main_Pathway - KEGG Adjusted 1.5	0.196841	0.238486
KEGG_Endocytosis_Main_Pathway - KEGG Adjusted 1.5	0.17952	0.235667
reactome_Intrinsic_Pathway_Main_Pathway - Reactome 1.3	0.197894	0.234164
reactome_Keratan_sulfate_biosynthesis_Main_Pathway - Reactome 1.3	0.23731	0.234153
reactome_Activation_of_G_protein_gated_Potassium_channels_Main_Pathway - Reactome 1.3	0.140137	0.233081
reactome_Inhibition_of_voltage_gated_Ca2_channels_via_Gbeta_gamma_subunits_Main_Pathway - Reactome 1.3	0.140137	0.233081
Hedgehog_Signaling_in_Mammals_no_Tubulin_Pathway - Primary 1.4	0.222486	0.232568
HIF1Alpha_Pathway_p53_Hypoxia_Pathway - Primary 1.4	0.254671	0.230833
biocarta_nfkb_activation_by_nontypeable_hemophilus_influenzae_Main_Pathway - Biocarta 1.2	0.201414	0.225172
IL-10_Pathway_Translational_Modulation - Primary 1.4	0.203999	0.225067
biocarta_keratinocyte_differentiation_Pathway_(keratinocyte_differentiation) - Biocarta 1.2	0.286013	0.223949
reactome_Downregulation_of_TGF_beta_receptor_signaling_Main_Pathway - Reactome 1.3	0.280559	0.222784
biocarta_proteasome_complex_Pathway_(Pathway_degradation_of_PSMA1) - Biocarta 1.2	0.214335	0.219802
KEGG_Glycosphingolipid_biosynthesis_globo_series_Main_Pathway - KEGG Adjusted 1.5	0.196658	0.219056
reactome_AKT_phosphorylates_targets_in_the_cytosol_Main_Pathway - Reactome 1.3	0.168362	0.218346
reactome_ABCA_transporters_in_lipid_homeostasis_Main_Pathway - Reactome 1.3	0.205533	0.212394
NCI_Signaling_events_mediated_by_Hepatocyte_Growth_Factor_Receptor_c_Met__Main_Pathway - NCI 1.2	0.121057	0.209354
TRAF_Pathway - Primary 1.4	0.206945	0.206453
reactome_Signaling_by_Hippo_Main_Pathway - Reactome 1.3	0.157765	0.204287
reactome_Deadenylation_of_mRNA_Main_Pathway - Reactome 1.3	0.208398	0.198812
reactome_Signaling_by_ERBB2_Main_Pathway - Reactome 1.3	0.220378	0.196273
Hedgehog_Signaling_in_Mammals_Pathway - Primary 1.4	0.218751	0.196156
KEGG_Wnt_signaling_Main_Pathway - KEGG Adjusted 1.5	0.215455	0.191776
KEGG_Circadian_rhythm_Main_Pathway - KEGG Adjusted 1.5	0.0803808	0.190646
biocarta_lissencephaly_gene_lis1_in_neuronal_migration_and_development_Main_Pathway - Biocarta 1.2	0.19695	0.189319
CDP-diacylglycerol_biosynthesis - Metabolism 1.4	0.213347	0.179534
reactome_repression_of_WNT_target_genes_Main_Pathway - Reactome 1.3	0.162052	0.17696
reactome_Activation_of_the_phototransduction_cascade_Main_Pathway - Reactome 1.3	0.0825537	0.166998
NCI_LKB1_signaling_events_Main_Pathway - NCI 1.2	0.173405	0.156785
reactome_Interleukin_1_signaling_Main_Pathway - Reactome 1.3	0.154801	0.155632
NCI_ErbB2_ErbB3_signaling_events_Pathway_(myelination) - NCI 1.2	0.145874	0.153559
reactome_regulation_of_FZD_by_ubiquitination_Main_Pathway - Reactome 1.3	0.254506	0.15272
reactome_Ion_transport_by_P_type_ATPases_Main_Pathway - Reactome 1.3	0.138142	0.131893
reactome_Synthesis_of_PC_Main_Pathway - Reactome 1.3	0.160652	0.124042
reactome_IRAK1_recruits_IKK_complex_Main_Pathway - Reactome 1.3	0.18907	0.122656
reactome_IRAK1_recruits_IKK_complex_upon_TLR7_8_or_9_stimulation_Main_Pathway - Reactome 1.3	0.18907	0.122656
reactome_Insulin_processing_Main_Pathway - Reactome 1.3	0.103312	0.121992
reactome_Activation_of_IRF3_IRF7_mediated_by_TBK1_IKK_epsilon_Main_Pathway - Reactome 1.3	0.153648	0.115061
KEGG_Protein_export_Main_Pathway - KEGG Adjusted 1.5	0.132421	0.112079
reactome_RNA_Polymerase_II_HIV_Promoter_Escape_Main_Pathway - Reactome 1.3	0.16671	0.110926
reactome_RNA_Polymerase_II_Promoter_Escape_Main_Pathway - Reactome 1.3	0.16671	0.110926
reactome_Abortive_elongation_of_HIV_1_transcript_in_the_absence_of_Tat_Main_Pathway - Reactome 1.3	0.143146	0.109482
biocarta_role_of_erbb2_in_signal_transduction_and_oncology_Main_Pathway - Biocarta 1.2	0.119178	0.0992895
reactome_IRAK2_mediated_activation_of_TAK1_complex_Main_Pathway - Reactome 1.3	0.211651	0.0926267
reactome_IRAK2_mediated_activation_of_TAK1_complex_upon_TLR7_8_or_9_stimulation_Main_Pathway - Reactome 1.3	0.211651	0.0926267
reactome_RNA_Pol_II_CTD_phosphorylation_and_interaction_with_CE_Main_Pathway - Reactome 1.3	0.183774	0.0851602
reactome_Synthesis_secretion_and_inactivation_of_Glucagon_like_Peptide_1_GLP_1__Main_Pathway - Reactome 1.3	0.0970264	0.0777752
reactome_Synthesis_secretion_and_inactivation_of_Glucose_dependent_Insulinotropic_Polypeptide_GIP__Main_Pathway - Reactome 1.3	0.0970264	0.0777752
reactome_Dual_incision_reaction_in_TC_NER_Main_Pathway - Reactome 1.3	0.139998	0.072021
reactome_Synthesis_secretion_and_deacylation_of_Ghrelin_Main_Pathway - Reactome 1.3	-0.0635803	-0.0553291
KEGG_Thyroid_hormone_synthesis_Main_Pathway - KEGG Adjusted 1.5	NA	NA
